# Supplementary material for: Predictive model of explosive detonation parameters from an equation of state based on detonation velocity
Source: Royal Society of Chemistry journal article supplement (doi:10.1039/d2cp00085g), 2022-01-01
Supplement: d2cp00085g2.pdf [file d2cp00085g2.pdf]

DEoS DATABASE

| EXPLOSIVES               | 238                                                     | CHNO Composition (mol/100g)      | Other elements (% weight X) | hierarchy | [C+H+P+S] as inerts | Average values | $Q_{DEoS}$ (cal/g) |                  | $w$ (m/s per kg/m <sup>3</sup> ) | $Do$ (m/s)   | $C$ (m/s per cal/g) | $W = \left(\frac{\partial D}{\partial \rho_0}\right)_Q$ |             |            |            |        |                    |                  |               |             |            |            |
|--------------------------|---------------------------------------------------------|----------------------------------|-----------------------------|-----------|---------------------|----------------|--------------------|------------------|----------------------------------|--------------|---------------------|---------------------------------------------------------|-------------|------------|------------|--------|--------------------|------------------|---------------|-------------|------------|------------|
|                          |                                                         |                                  |                             |           |                     |                | $Q_{DEoS}$ (cal/g) | $Q_{th}$ (cal/g) |                                  |              |                     | $\Phi_i$ (KJ)                                           | $Do$ (DEoS) | $w$ (DEoS) | $C$ (DEoS) |        |                    |                  |               |             |            |            |
| Acronym                  | Name                                                    | $\Delta H^{\circ}_{298}$ (cal/g) | reference                   | C         | H                   | N              | O                  | X: (Cl+H+P+S)    | Comp.                            | type (Xiong) | C (s)               | H2O (g)                                                 | CO2 (g)     | N2 (g)     | H2 (g)     | O2 (g) | $Q_{DEoS}$ (cal/g) | $Q_{th}$ (cal/g) | $\Phi_i$ (KJ) | $Do$ (DEoS) | $w$ (DEoS) | $C$ (DEoS) |
| abh                      | azobis(2,2',4,4',6,6'-hexanitrobiophenyl)               | 133                              | [8]                         | 2.745     | 0.686               | 1.601          | 2.745              | 0.0              | CHNO                             | 3.0          | 1.544               | 0.343                                                   | 1.201       | 0.801      | 0.000      | 0.000  | 1306               | 1460             | 5.28          | 2368        | 2.9        | 0.9        |
| AFX902                   | AFX902                                                  | -299                             | [c]                         | 1.046     | 3.745               | 3.651          | 3.745              | 3.3              | CHNOX                            | 3.0          | 1.046               | 1.826                                                   | 0.800       | 1.826      | 0.007      | 0.000  | 652                | 756              |               | 1672        | 3.7        | 1.3        |
| bchmxy                   | o,s-1,3,4,6-tetranitrooctahydroimidazo-[4,5-d]imidazole | 192                              | [3]                         | 1.360     | 2.040               | 2.720          | 2.720              | 0.0              | CHNO                             | 2.0          | 0.510               | 1.020                                                   | 0.850       | 1.360      | 0.000      | 0.000  | 1520               | 1581             | 6.92          | 2563        | 3.4        | 0.8        |
| BCHMX/GAP (84/16)        | BCHMX/GAP (84/16)                                       | 335                              | [4]                         | 1.671     | 2.669               | 2.706          | 2.459              | 0.0              | CHNO                             | 3.0          | 1.109               | 1.334                                                   | 0.562       | 1.353      | 0.000      | 0.000  | 1525               | 1635             | 6.79          | 2588        | 3.4        | 0.8        |
| BCHMX/PiB (91/9)         | BCHMX/PiB (91/9)                                        | 487                              | [c]                         | 1.827     | 2.976               | 2.475          | 2.525              | 0.0              | CHNO                             | 3.0          | 1.308               | 1.488                                                   | 0.518       | 1.238      | 0.000      | 0.000  | 1365               | 1496             | 6.39          | 2420        | 3.4        | 0.9        |
| BCHMX/SYLWARD (85/15)    | BCHMX/SYLWARD (85/15)                                   | -49                              | [3]                         | 1.549     | 2.883               | 2.346          | 2.502              | 5.6              | CHNOX                            | 3.0          | 1.018               | 1.442                                                   | 0.530       | 1.173      | 0.000      | 0.000  | 1133               | 1235             |               | 2205        | 3.4        | 1.0        |
| BCHMX/VITON (95/5)       | BCHMX/VITON (95/5)                                      | 94                               | [c]                         | 1.426     | 2.031               | 2.584          | 2.584              | 3.3              | CHNOX                            | 3.0          | 0.641               | 1.016                                                   | 0.784       | 1.292      | 0.000      | 0.000  | 1354               | 1418             |               | 2411        | 3.4        | 0.9        |
| BCHMX/VITON (97/3)       | BCHMX/VITON (97/3)                                      | 133                              | [c]                         | 1.399     | 2.035               | 2.638          | 2.638              | 2.0              | CHNOX                            | 3.0          | 0.589               | 1.017                                                   | 0.810       | 1.319      | 0.000      | 0.000  | 1424               | 1483             |               | 2473        | 3.4        | 0.9        |
| bif                      | benzotris[1,2,5]oxadiazole-1,4,7-trioxide               | 551                              | [47]                        | 2.380     | 0.000               | 2.380          | 2.380              | 0.0              | CNO                              | 3.0          | 1.190               | 0.000                                                   | 1.190       | 1.190      | 0.000      | 0.000  | 1551               | 1670             | 5.84          | 2580        | 3.2        | 0.8        |
| btne                     | bis(2,2,2-trinitroethyl) nitramine                      | -17                              | [48]                        | 1.031     | 1.031               | 2.061          | 3.607              | 0.0              | CHNO                             | 1.0          | 0.000               | 0.515                                                   | 1.031       | 1.031      | 0.000      | 0.515  | 1250               | 1250             | 6.22          | 2317        | 3.2        | 0.9        |
| BTNEN/BTF (60/40)        | BTNEN/BTF (60/40)                                       | 210                              | [c]                         | 1.570     | 0.618               | 1.189          | 3.116              | 0.0              | CHNO                             | 2.0          | 0.167               | 0.309                                                   | 1.404       | 1.094      | 0.000      | 0.000  | 1692               | 1709             | 6.86          | 2695        | 3.2        | 0.8        |
| BTNEN/HMX (30/70)        | BTNEN/HMX (30/70)                                       | 37                               | [c]                         | 1.255     | 2.100               | 2.509          | 2.973              | 0.0              | CHNO                             | 2.0          | 0.318               | 1.100                                                   | 0.936       | 1.255      | 0.000      | 0.000  | 1522               | 1554             | 7.01          | 2556        | 3.4        | 0.8        |
| BTNEN/HMX (32/68)        | BTNEN/HMX (32/68)                                       | 36                               | [c]                         | 1.248     | 2.167               | 2.496          | 2.991              | 0.0              | CHNO                             | 2.0          | 0.294               | 1.083                                                   | 0.954       | 1.248      | 0.000      | 0.000  | 1530               | 1559             | 7.03          | 2562        | 3.4        | 0.8        |
| BTNEN/RDX (56/44)        | BTNEN/RDX (56/44)                                       | 20                               | [c]                         | 1.171     | 1.766               | 2.343          | 3.209              | 0.0              | CHNO                             | 2.0          | 0.009               | 0.883                                                   | 1.163       | 1.171      | 0.000      | 0.000  | 1623               | 1624             | 7.22          | 2639        | 3.4        | 0.8        |
| btneu                    | bis(trinitroethyl) urea                                 | -199                             | [48]                        | 1.295     | 1.554               | 2.072          | 3.367              | 0.0              | CHNO                             | 1.0          | 0.000               | 0.777                                                   | 1.295       | 1.036      | 0.000      | 0.000  | 1468               | 1468             | 6.75          | 2510        | 3.3        | 0.9        |
| btcc                     | bis-(2,2,2-trinitroethyl)-carbonate                     | -388                             | [48]                        | 1.288     | 1.031               | 1.546          | 3.865              | 0.0              | CHNO                             | 1.0          | 0.000               | 0.515                                                   | 1.288       | 0.773      | 0.000      | 0.386  | 1122               | 1122             | 5.77          | 2194        | 3.1        | 1.0        |
| cl-20                    | hexanitrohexaazaisowurtzitane                           | 448                              | [4]                         | 1.369     | 1.369               | 2.739          | 2.739              | 0.0              | CHNO                             | 2.0          | 0.342               | 0.685                                                   | 1.027       | 1.369      | 0.000      | 0.000  | 1776               | 1810             | 7.31          | 2761        | 3.4        | 0.8        |
| CL20/GAP (84/16)         | CL20/GAP (84/16)                                        | 320                              | [4]                         | 1.675     | 2.092               | 2.691          | 2.505              | 0.0              | CHNO                             | 3.0          | 0.946               | 1.046                                                   | 0.729       | 1.346      | 0.000      | 0.000  | 1516               | 1611             | 6.68          | 2551        | 3.4        | 0.8        |
| CL-20/HTPB (91/9)        | CL-20/HTPB (91/9)                                       | 407                              | [c]                         | 1.890     | 2.258               | 2.500          | 2.500              | 0.0              | CHNO                             | 3.0          | 1.205               | 1.129                                                   | 0.685       | 1.250      | 0.000      | 0.000  | 1584               | 1705             | 6.68          | 2608        | 3.3        | 0.8        |
| CL-20/HTPB (92/8)        | CL-20/HTPB (92/8)                                       | 412                              | [c]                         | 1.832     | 2.159               | 2.527          | 2.526              | 0.0              | CHNO                             | 3.0          | 1.109               | 1.080                                                   | 0.723       | 1.263      | 0.000      | 0.000  | 1605               | 1716             | 6.75          | 2625        | 3.3        | 0.8        |
| CL-20/PiB (91/9)         | CL-20/PiB (91/9)                                        | 381                              | [c]                         | 1.835     | 2.366               | 2.492          | 2.542              | 0.0              | CHNO                             | 3.0          | 1.156               | 1.183                                                   | 0.679       | 1.246      | 0.000      | 0.000  | 1588               | 1704             | 6.75          | 2611        | 3.3        | 0.8        |
| CL20/SYLWARD (85/15)     | CL20/SYLWARD (85/15)                                    | -46                              | [3]                         | 1.545     | 2.298               | 2.365          | 2.540              | 5.4              | CHNOX                            | 3.0          | 0.849               | 1.149                                                   | 0.696       | 1.182      | 0.000      | 0.000  | 1187               | 1272             |               | 2257        | 3.4        | 1.0        |
| COMP B                   | COMP B                                                  | 10                               | [c]                         | 2.032     | 2.637               | 2.177          | 2.653              | 0.0              | CHNO                             | 3.0          | 1.364               | 1.318                                                   | 0.667       | 1.089      | 0.000      | 0.000  | 1263               | 1399             | 6.00          | 2328        | 3.3        | 0.9        |
| COMP C3                  | composition c3 (as single)                              | -14                              | [8][10]average              | 1.899     | 2.829               | 2.339          | 2.599              | 0.0              | CHNO                             | 3.0          | 1.307               | 1.414                                                   | 0.592       | 1.169      | 0.000      | 0.000  | 1230               | 1361             | 6.04          | 2298        | 3.3        | 0.9        |
| COMP C4                  | COMP C4                                                 | 33                               | [c]                         | 1.818     | 3.578               | 2.458          | 2.508              | 0.0              | CHNO                             | 3.0          | 1.459               | 1.789                                                   | 0.359       | 1.229      | 0.000      | 0.000  | 1260               | 1405             | 6.26          | 2325        | 3.4        | 0.9        |
| daaf                     | 3,3'-diamino-4,4'-azoxyfuran                            | 500                              | [35]                        | 1.886     | 1.886               | 3.771          | 1.414              | 0.0              | CHNO                             | 3.0          | 1.650               | 0.943                                                   | 0.236       | 1.886      | 0.000      | 0.000  | 1101               | 1266             | 5.58          | 2174        | 3.4        | 1.0        |
| DAAF/HMX/VITON (45/50/5) | DAAF/HMX/VITON (45/50/5)                                | 166                              | [c]                         | 1.658     | 2.293               | 3.048          | 1.987              | 3.3              | CHNOX                            | 3.0          | 1.237               | 1.146                                                   | 0.420       | 1.524      | 0.000      | 0.000  | 1100               | 1224             | 5.24          | 2173        | 3.4        | 1.0        |
| DAAF/HMX/VITON (60/35/5) | DAAF/HMX/VITON (60/35/5)                                | 232                              | [c]                         | 1.738     | 2.170               | 3.208          | 1.794              | 3.3              | CHNOX                            | 3.0          | 1.383               | 1.085                                                   | 0.354       | 1.604      | 0.000      | 0.000  | 1054               | 1193             |               | 2127        | 3.4        | 1.0        |
| DAAF/HMX/VITON (80/15/5) | DAAF/HMX/VITON (80/15/5)                                | 320                              | [c]                         | 1.845     | 2.007               | 3.422          | 1.537              | 3.3              | CHNOX                            | 3.0          | 1.578               | 1.004                                                   | 0.266       | 1.711      | 0.000      | 0.000  | 993                | 1151             |               | 2064        | 3.4        | 1.0        |
| DAAF/RDX/VITON (60/35/5) | DAAF/RDX/VITON (60/35/5)                                | 234                              | [c]                         | 1.738     | 2.170               | 3.208          | 1.794              | 3.3              | CHNOX                            | 3.0          | 1.383               | 1.085                                                   | 0.354       | 1.604      | 0.000      | 0.000  | 1056               | 1195             |               | 2129        | 3.4        | 1.0        |
| DAAF/RDX/VITON (80/15/5) | DAAF/RDX/VITON (80/15/5)                                | 321                              | [c]                         | 1.845     | 2.007               | 3.422          | 1.537              | 3.3              | CHNOX                            | 3.0          | 1.578               | 1.004                                                   | 0.266       | 1.711      | 0.000      | 0.000  | 994                | 1151             |               | 2065        | 3.4        | 1.0        |
| DAAF/VITON (95/5)        | DAAF/VITON (95/5)                                       | 386                              | [c]                         | 1.925     | 1.885               | 3.583          | 1.344              | 3.3              | CHNOX                            | 3.0          | 1.724               | 0.942                                                   | 0.201       | 1.791      | 0.000      | 0.000  | 947                | 1119             |               | 2016        | 3.4        | 1.1        |
| datb                     | 1,3-diamino-2,4,6-trinitrobenzene                       | -120                             | [8]                         | 2.468     | 2.056               | 2.056          | 2.468              | 0.0              | CHNO                             | 3.0          | 1.748               | 1.028                                                   | 0.720       | 1.028      | 0.000      | 0.000  | 976                | 1151             | 5.02          | 2047        | 3.1        | 1.0        |
| degn                     | diethyleneglycol dinitrate                              | -507                             | [8]                         | 2.040     | 4.079               | 1.020          | 3.569              | 0.0              | CHNO                             | 3.0          | 1.275               | 2.040                                                   | 0.765       | 0.510      | 0.000      | 0.000  | 1264               | 1391             | 6.25          | 2329        | 3.3        | 0.9        |
| dina                     | di(2-nitroethyl)-nitramine                              | -314                             | [8]                         | 1.666     | 3.32                | 1.666          | 3.32               | 0.0              | CHNO                             | 3.0          | 0.833               | 1.666                                                   | 0.833       | 0.833      | 0.000      | 0.000  | 1349               | 1432             | 6.55          | 2406        | 3.4        | 0.9        |
| dipam                    | (2,2',4,4',6,6'-hexanitro-1,1'-biphenyl)-3,3'-diamine   | -44                              | [8]                         | 2.642     | 1.321               | 1.761          | 2.642              | 0.0              | CHNO                             | 3.0          | 1.651               | 0.660                                                   | 0.991       | 0.881      | 0.000      | 0.000  | 1104               | 1269             | 5.08          | 2177        | 3.0        | 1.0        |
| dipetn                   | dipentaerythritol hexanitrate                           | -446                             | [8]                         | 1.907     | 3.052               | 1.144          | 3.624              | 0.0              | CHNO                             | 2.0          | 0.858               | 1.526                                                   | 1.049       | 0.572      | 0.000      | 0.000  | 1307               | 1423             | 6.34          | 2395        | 3.2        | 0.9        |
| dipicrylamine            | hexanitrodiphenylamine                                  | -23                              | [48]                        | 2.732     | 1.138               | 1.594          | 2.732              | 0.0              | CHNO                             | 3.0          | 1.651               | 0.569                                                   | 1.081       | 0.797      | 0.000      | 0.000  | 1204               | 1369             | 5.18          | 2273        | 2.9        | 0.9        |
| dmitnb                   | dinitrophenoxylethylnitrate                             | -243                             | [48]                        | 2.929     | 2.563               | 1.098          | 2.929              | 0.0              | CHNO                             | 3.0          | 2.105               | 1.281                                                   | 0.824       | 0.549      | 0.000      | 0.000  | 1062               | 1272             | 5.02          | 2135        | 3.0        | 1.0        |
| dmitp                    | ethyl picrate                                           | -187                             | [48]                        | 3.111     | 2.722               | 1.777          | 2.722              | 0.0              | CHNO                             | 3.0          | 2.430               | 1.361                                                   | 0.681       | 0.583      | 0.000      | 0.000  | 997                | 1240             | 4.80          | 2069        | 2.9        | 1.0        |
| dnaf                     | dinitrodiazefuroxan                                     | 554                              | [47]                        | 1.388     | 0.000               | 2.777          | 2.777              | 0.0              | CHNO                             | 1.0          | 0.000               | 0.000                                                   | 1.388       | 1.388      | 0.000      | 0.000  | 1860               | 1860             | 7.19          | 2825        | 3.5        | 0.8        |
| DNAM/RDX/NTO (40/20/40)  | DNAM/RDX/NTO (40/20/40)                                 | -163                             | [c]                         | 2.298     | 2.367               | 2.174          | 2.472              | 0.0              | CHNO                             | 3.0          | 1.654               | 1.183                                                   | 0.644       | 1.087      | 0.000      | 0.000  | 1127               | 1272             | 5.13          | 2032        | 3.2        | 1.1        |
| dnb                      | dinitrobenzol                                           | -37                              | [8]                         | 3.569     | 2.379               | 1.190          | 2.379              | 0.0              | CHNO                             | 3.0          | 2.974               | 1.190                                                   | 0.595       | 0.595      | 0.000      | 0.000  | 913                | 1210             | 4.30          | 1979        | 2.8        | 1.1        |
| dnmdo                    | n,n'-dinitro-n,n'-dimethylouamide                       | -355                             | [48]                        | 1.941     | 2.911               | 1.941          | 2.911              | 0.0              | CHNO                             | 3.0          | 1.213               | 1.455                                                   | 0.728       | 0.970      | 0.000      | 0.000  | 1050               | 1171             | 5.62          | 2123        | 3.3        | 1.0        |
| dnmf                     | 3,4-bis(4-nitrofuran-3-yl)furoxan                       | 503                              | [35]                        | 1.922     | 0.000               | 2.563          | 2.563              | 0.0              | CNO                              | 2.0          | 0.641               | 0.000                                                   | 1.282       | 1.282      | 0.000      | 0.000  | 1644               | 1708             | 6.36          | 2657        | 3.3        | 0.8        |
| dnmt                     | 1-methyl-3,5-dinitro-1,2,4-triazole                     | 253                              | [35]                        | 1.733     | 1.733               | 2.889          | 2.311              | 0.0              | CHNO                             | 3.0          | 1.011               | 0.867                                                   | 0.722       | 1.444      | 0.000      | 0.000  | 1332               | 1433             | 6.18          | 2391        | 3.3        | 0.9        |
| DNMT/HMX (49.5/50.5)     | DNMT/HMX (49.5/50.5)                                    | 156                              | [c]                         | 1.540     | 2.222               | 2.794          | 2.508              | 0.0              | CHNO                             | 3.0          | 0.842               | 1.111                                                   | 0.699       | 1.397      | 0.000      | 0.000  | 1371               | 1455             | 6.48          | 2425        | 3.4        | 0.9        |
| dnp                      | 3,4-dinitroproprazole                                   | 182                              | [35]                        | 1.898     | 1.265               | 2.530          | 2.530              | 0.0              | CHNO                             | 3.0          | 0.949               | 0.633                                                   | 0.949       | 1.265      | 0.000      | 0.000  | 1345               | 1440             | 6.03          | 2403        | 3.2        | 0.9        |
| dng                      | dinitroguanidine                                        | 0                                | [47]                        | 0.671     | 2.013               | 3.354          | 2.683              | 0.0              | CHNO                             | 1.0          | 0.000               | 1.006                                                   | 0.671       | 1.677      | 0.000      | 0.168  | 1213               | 1213             | 6.53          | 2281        | 3.6        | 0.9        |
| dntfx                    | dinitrofuroxanyl                                        | 389                              | [56]                        | 1.538     | 0.000               | 2.307          | 3.076              | 0.0              | CNO                              | 1.0          | 0.000               | 0.000                                                   | 1.538       | 1.153      | 0.000      | 0.000  | 1835               | 1835             | 7.03          | 2807        | 3.4        | 0.8        |
| dp12                     | dp12                                                    | -228                             | [8]                         | 1.428     | 2.856               | 0.952          | 1.904              | 36.2             | CHNOX                            | 3.0          | 1.190               | 1.428                                                   | 0.238       | 0.476      | 0.000      | 0.000  | 702                | 821              |               | 1735        | 3.3        | 1.2        |
| edad                     | ethylenediamine dinitrate                               | -837                             | [48]                        | 1.075     | 5.373               | 2.149          | 3.224              | 0.0              | CHNO                             | 3.0          | 0.806               | 2.686                                                   | 0.269       | 1.075      | 0.000      | 0.000  | 888                | 968              | 5.94          | 1952        | 3.7        |            |

PREDICTIVE MODEL FOR EXPLOSIVE DETONATION PARAMETERS FROM AN EQUATION OF STATE BASED ON DETONATION VELOCITY. Physical Chemistry Chemical Physics 2022

DEoS DATABASE

| EXPLOSIVES                |                                            | 238                        |           | CHNO Composition (mol/100g) |        |       | Other elements (% weight X) |               | hierarchy |              |       | [C+H+P+S] as inerts |         |        | Average values |        |                |                         |          |           |          |          |
|---------------------------|--------------------------------------------|----------------------------|-----------|-----------------------------|--------|-------|-----------------------------|---------------|-----------|--------------|-------|---------------------|---------|--------|----------------|--------|----------------|-------------------------|----------|-----------|----------|----------|
| Acronym                   | Name                                       | $\Delta H^0_{298}$ (cal/g) | reference | C                           | H      | N     | O                           | X: (Cl+F+P+S) | Comp.     | type (Xlong) | C (s) | H2O (g)             | CO2 (g) | N2 (g) | H2 (g)         | O2 (g) | Q_DEoS (cal/g) | Q <sub>0i</sub> (cal/g) | Phi (kJ) | Do (DEoS) | w (DEoS) | C (DEoS) |
| HAC/W (69/31)             | HAC/W (69/31)                              | -164                       | [c]       | 0.000                       | 5.080  | 4.783 | 1.743                       | 0.0           | HNO       | 5.0          | 0.000 | 1.743               | 0.000   | 2.391  | 0.797          | 0.000  | 843            | 843                     | 6.45     | 1903      | 4.3      | 1.1      |
| HAC/W (78/26)             | HAC/W (78/26)                              | 354                        | [c]       | 0.000                       | 4.220  | 5.466 | 1.199                       | 0.0           | HNO       | 5.0          | 0.000 | 1.199               | 0.000   | 2.733  | 0.911          | 0.000  | 1047           | 1047                    | 7.12     | 2120      | 4.4      | 1.0      |
| HAC/W (88/12)             | HAC/W (88/12)                              | 873                        | [c]       | 0.000                       | 3.360  | 6.149 | 0.655                       | 0.0           | HNO       | 5.0          | 0.000 | 0.655               | 0.000   | 3.075  | 1.025          | 0.000  | 1251           | 1251                    | 7.71     | 2317      | 4.4      | 0.9      |
| HAC/W (93/7)              | HAC/W (93/7)                               | 1132                       | [c]       | 0.000                       | 2.930  | 6.491 | 0.383                       | 0.0           | HNO       | 5.0          | 0.000 | 0.383               | 0.000   | 3.246  | 1.082          | 0.000  | 1353           | 1353                    | 7.98     | 2410      | 4.4      | 0.9      |
| HAC/W (98/2)              | HAC/W (98/2)                               | 1407                       | [c]       | 0.000                       | 2.473  | 6.854 | 0.094                       | 0.0           | HNO       | 5.0          | 0.000 | 0.094               | 0.000   | 3.427  | 1.142          | 0.000  | 1461           | 1461                    | 8.26     | 2504      | 4.4      | 0.9      |
| hco                       | 1,3,3,5,7,7-hexanitro-1,5-diazacyclooctane | -17                        | [33]      | 1.562                       | 2.082  | 2.082 | 3.124                       | 0.0           | CHNO      | 2.0          | 0.521 | 1.041               | 1.041   | 0.000  | 0.000          | 0.000  | 1512           | 1564                    | 6.77     | 2547      | 3.3      | 0.8      |
| hmx                       | cyclotetramethylenetetrantramine           | 61                         | [8]       | 1.351                       | 2.701  | 2.701 | 2.701                       | 0.0           | CHNO      | 3.0          | 0.675 | 1.351               | 1.351   | 0.000  | 0.000          | 0.000  | 1409           | 1476                    | 6.77     | 2459      | 3.5      | 0.9      |
| HMV/EXON (91/9)           | HMV/EXON (91/9)                            | -31                        | [c]       | 1.448                       | 2.648  | 2.446 | 2.446                       | 0.6           | CHNOX     | 3.0          | 0.887 | 1.324               | 0.561   | 1.223  | 0.000          | 0.000  | 1173           | 1262                    | 6.77     | 2244      | 3.4      | 1.0      |
| HMV/GAP (84/16)           | HMV/GAP (84/16)                            | 208                        | [4]       | 1.642                       | 2.877  | 2.714 | 2.460                       | 0.6           | CHNO      | 3.0          | 1.132 | 1.439               | 0.511   | 1.357  | 0.000          | 0.000  | 1407           | 1520                    | 6.59     | 2457      | 3.4      | 0.9      |
| HMV/HN (75/25)            | HMV/HN (75/25)                             | -110                       | [c]       | 1.013                       | 3.341  | 2.815 | 2.815                       | 0.0           | CHNO      | 2.0          | 0.441 | 1.670               | 0.572   | 1.407  | 0.000          | 0.000  | 1350           | 1394                    | 6.94     | 2407      | 3.6      | 0.9      |
| HMV/PIB (91/9)            | HMV/PIB (91/9)                             | 28                         | [c]       | 1.818                       | 3.578  | 2.458 | 2.508                       | 0.0           | CHNO      | 3.0          | 1.459 | 1.789               | 0.359   | 1.229  | 0.000          | 0.000  | 1254           | 1400                    | 6.25     | 2320      | 3.4      | 0.9      |
| HMV/SVLGARD (85/15)       | HMV/SVLGARD (85/15)                        | -203                       | [3]       | 1.535                       | 3.424  | 2.325 | 2.505                       | 5.5           | CHNOX     | 3.0          | 1.138 | 1.712               | 0.397   | 1.163  | 0.000          | 0.000  | 1046           | 1160                    | 6.25     | 2119      | 3.5      | 1.0      |
| HMV/TATB/VITON (10/80/10) | HMV/TATB/VITON (10/80/10)                  | -286                       | [c]       | 2.262                       | 2.317  | 2.130 | 2.130                       | 6.6           | CHNOX     | 3.0          | 1.776 | 1.158               | 0.486   | 1.065  | 0.000          | 0.000  | 663            | 840                     | 6.86     | 1686      | 3.2      | 1.3      |
| HMV/TATB/VITON (20/70/10) | HMV/TATB/VITON (20/70/10)                  | -266                       | [c]       | 2.164                       | 2.354  | 2.167 | 2.167                       | 6.6           | CHNOX     | 3.0          | 1.669 | 1.177               | 0.495   | 1.084  | 0.000          | 0.000  | 713            | 880                     | 6.86     | 1750      | 3.2      | 1.2      |
| HMV/TATB/VITON (30/60/10) | HMV/TATB/VITON (30/60/10)                  | -245                       | [c]       | 2.067                       | 2.392  | 2.205 | 2.205                       | 6.6           | CHNOX     | 3.0          | 1.563 | 1.196               | 0.504   | 1.102  | 0.000          | 0.000  | 764            | 920                     | 6.86     | 1811      | 3.2      | 1.2      |
| HMV/TATB/VITON (40/50/10) | HMV/TATB/VITON (40/50/10)                  | -225                       | [c]       | 1.970                       | 2.430  | 2.243 | 2.243                       | 6.6           | CHNOX     | 3.0          | 1.456 | 1.215               | 0.514   | 1.121  | 0.000          | 0.000  | 815            | 960                     | 6.86     | 1870      | 3.3      | 1.1      |
| HMV/TATB/VITON (50/40/10) | HMV/TATB/VITON (50/40/10)                  | -205                       | [c]       | 1.872                       | 2.467  | 2.280 | 2.280                       | 6.6           | CHNOX     | 3.0          | 1.349 | 1.234               | 0.523   | 1.140  | 0.000          | 0.000  | 866            | 1001                    | 6.86     | 1928      | 3.3      | 1.1      |
| HMV/TATB/VITON (60/30/10) | HMV/TATB/VITON (60/30/10)                  | -184                       | [c]       | 1.775                       | 2.505  | 2.318 | 2.318                       | 6.6           | CHNOX     | 3.0          | 1.242 | 1.253               | 0.533   | 1.159  | 0.000          | 0.000  | 916            | 1041                    | 6.86     | 1983      | 3.3      | 1.1      |
| HMV/TATB/VITON (70/20/10) | HMV/TATB/VITON (70/20/10)                  | -164                       | [c]       | 1.678                       | 2.543  | 2.356 | 2.356                       | 6.6           | CHNOX     | 3.0          | 1.135 | 1.271               | 0.542   | 1.178  | 0.000          | 0.000  | 967            | 1081                    | 6.86     | 2037      | 3.4      | 1.1      |
| HMV/TATB/VITON (80/10/10) | HMV/TATB/VITON (80/10/10)                  | -144                       | [c]       | 1.580                       | 2.581  | 2.393 | 2.393                       | 6.6           | CHNOX     | 3.0          | 1.029 | 1.290               | 0.552   | 1.197  | 0.000          | 0.000  | 1018           | 1121                    | 6.86     | 2090      | 3.4      | 1.0      |
| HMV/TNT (60/40)           | HMV/TNT (60/40)                            | 5                          | [c]       | 2.043                       | 2.501  | 2.149 | 2.677                       | 0.0           | CHNO      | 3.0          | 1.330 | 1.251               | 0.713   | 1.075  | 0.000          | 0.000  | 1266           | 1399                    | 5.98     | 2331      | 3.3      | 0.9      |
| HMV/TNT (70/30)           | HMV/TNT (70/30)                            | 19                         | [c]       | 1.870                       | 2.551  | 2.287 | 2.683                       | 0.0           | CHNO      | 3.0          | 1.166 | 1.276               | 0.704   | 1.144  | 0.000          | 0.000  | 1302           | 1418                    | 6.17     | 2364      | 3.3      | 0.9      |
| HMV/TNT (75/25)           | HMV/TNT (75/25)                            | 26                         | [c]       | 1.783                       | 2.576  | 2.356 | 2.686                       | 0.0           | CHNO      | 3.0          | 1.084 | 1.288               | 0.699   | 1.178  | 0.000          | 0.000  | 1319           | 1428                    | 6.27     | 2380      | 3.3      | 0.9      |
| HMV/TNT (78/22)           | HMV/TNT (78/22)                            | 30                         | [c]       | 1.732                       | 2.591  | 2.398 | 2.688                       | 0.0           | CHNO      | 3.0          | 1.035 | 1.296               | 0.696   | 1.199  | 0.000          | 0.000  | 1330           | 1434                    | 6.33     | 2389      | 3.4      | 0.9      |
| HMV/TNT (80/20)           | HMV/TNT (80/20)                            | 33                         | [c]       | 1.697                       | 2.601  | 2.425 | 2.689                       | 0.0           | CHNO      | 3.0          | 1.003 | 1.301               | 0.694   | 1.213  | 0.000          | 0.000  | 1337           | 1438                    | 6.37     | 2396      | 3.4      | 0.9      |
| HMV/TNT (89/11)           | HMV/TNT (89/11)                            | 45                         | [c]       | 1.541                       | 2.646  | 2.549 | 2.695                       | 0.0           | CHNO      | 3.0          | 0.855 | 1.323               | 0.686   | 1.275  | 0.000          | 0.000  | 1369           | 1455                    | 6.55     | 2424      | 3.4      | 0.9      |
| HMV/TNT (90/10)           | HMV/TNT (90/10)                            | 47                         | [c]       | 1.524                       | 2.651  | 2.563 | 2.695                       | 0.0           | CHNO      | 3.0          | 0.839 | 1.326               | 0.685   | 1.282  | 0.000          | 0.000  | 1373           | 1457                    | 6.57     | 2428      | 3.4      | 0.9      |
| hn                        | hydrazine nitrate                          | -621                       | [8]       | 0.000                       | 5.260  | 3.156 | 3.156                       | 0.0           | HNO       | 1.0          | 0.000 | 2.630               | 0.000   | 1.578  | 0.000          | 0.263  | 899            | 899                     | 6.34     | 1965      | 3.9      | 1.1      |
| hnab                      | 2,2',4,4',6,6'-hexanitrozobenzene          | 150                        | [8]       | 2.654                       | 0.885  | 1.769 | 2.654                       | 0.0           | HNO       | 3.0          | 1.548 | 0.442               | 1.106   | 0.885  | 0.000          | 0.000  | 1291           | 1446                    | 5.35     | 2354      | 3.0      | 0.9      |
| hnb                       | hexanitrobenzene                           | 136                        | [47]      | 1.724                       | 0.900  | 1.724 | 3.447                       | 0.0           | CNO       | 1.0          | 0.000 | 0.000               | 1.724   | 0.862  | 0.000          | 0.000  | 1758           | 1758                    | 6.74     | 2747      | 3.3      | 0.8      |
| hnbp                      | 2,2',4,4',6,6'-hexanitrobiphenyl           | 34                         | [48]      | 2.829                       | 0.943  | 1.414 | 2.829                       | 0.0           | CHNO      | 3.0          | 1.650 | 0.471               | 1.179   | 0.707  | 0.000          | 0.000  | 1250           | 1415                    | 5.17     | 2317      | 2.9      | 0.9      |
| hnetn                     | hexanitroethane                            | 67                         | [47]      | 0.667                       | 0.000  | 2.000 | 3.999                       | 0.0           | CNO       | 1.0          | 0.000 | 0.000               | 0.667   | 1.000  | 0.000          | 1.333  | 694            | 694                     | 4.56     | 1725      | 3.1      | 1.2      |
| hns                       | 2,2',4,4',6,6'-hexanitrostilbene           | 42                         | [8]       | 3.109                       | 1.333  | 1.333 | 2.665                       | 0.0           | CHNO      | 3.0          | 2.110 | 0.666               | 0.999   | 0.666  | 0.000          | 0.000  | 1156           | 1269                    | 4.88     | 2227      | 2.9      | 1.0      |
| HZ/HN (21/79)             | HZ/HN (21/79)                              | -411                       | [c]       | 0.000                       | 6.777  | 3.804 | 2.493                       | 0.0           | HNO       | 5.0          | 0.000 | 2.493               | 0.000   | 1.902  | 0.895          | 0.000  | 1030           | 1030                    | 7.38     | 2102      | 4.4      | 1.0      |
| HZ/HN (70/30)             | HZ/HN (70/30)                              | 77                         | [c]       | 0.000                       | 10.316 | 5.316 | 0.947                       | 0.0           | HNO       | 5.0          | 0.000 | 0.947               | 0.000   | 2.658  | 4.211          | 0.000  | 624            | 624                     | 6.99     | 1637      | 5.5      | 1.3      |
| IMX-104                   | IMX-104                                    | -175                       | [c]       | 2.142                       | 2.188  | 2.363 | 2.436                       | 0.0           | CHNO      | 3.0          | 1.471 | 1.094               | 0.671   | 1.182  | 0.000          | 0.000  | 941            | 1088                    | 5.14     | 2010      | 3.2      | 1.1      |
| ipn                       | isopropyl nitrate                          | -523                       | [48]      | 2.855                       | 6.661  | 0.952 | 2.855                       | 0.0           | CHNO      | 4.0          | 2.855 | 2.855               | 0.000   | 0.476  | 0.476          | 0.000  | 842            | 1127                    | 5.31     | 1901      | 3.4      | 1.1      |
| LLM-105/VITON (95/5)      | LLM-105/VITON (95/5)                       | 498                        | [c]       | 2.275                       | 0.807  | 2.856 | 1.785                       | 3.3           | CHNOX     | 3.0          | 1.585 | 0.404               | 0.691   | 1.428  | 0.000          | 0.000  | 1222           | 1381                    | 6.95     | 2497      | 3.4      | 0.9      |
| LLM-175/VITON (95/5)      | LLM-175/VITON (95/5)                       | 498                        | [c]       | 2.275                       | 0.807  | 2.856 | 1.785                       | 3.3           | CHNOX     | 3.0          | 1.585 | 0.404               | 0.691   | 1.428  | 0.000          | 0.000  | 1222           | 1381                    | 6.95     | 2497      | 3.4      | 0.9      |
| LX-01                     | LX-01                                      | -265                       | [c]       | 1.525                       | 3.727  | 1.694 | 3.388                       | 0.0           | CHNO      | 3.0          | 0.763 | 1.864               | 0.762   | 0.847  | 0.000          | 0.000  | 1453           | 1529                    | 6.95     | 2497      | 3.4      | 0.9      |
| LX-04                     | LX-04                                      | -215                       | [c]       | 1.549                       | 2.577  | 2.296 | 2.296                       | 9.9           | CHNOX     | 3.0          | 1.045 | 1.288               | 0.504   | 1.148  | 0.000          | 0.000  | 899            | 1003                    | 6.95     | 1964      | 3.4      | 1.1      |
| LX-07                     | LX-07                                      | -123                       | [c]       | 1.483                       | 2.618  | 2.431 | 2.431                       | 6.6           | CHNOX     | 3.0          | 0.922 | 1.309               | 0.561   | 1.216  | 0.000          | 0.000  | 1069           | 1161                    | 6.17     | 2142      | 3.4      | 1.0      |
| LX-09                     | LX-09                                      | 20                         | [c]       | 1.425                       | 2.736  | 2.592 | 2.721                       | 0.3           | CHNOX     | 3.0          | 0.749 | 1.368               | 0.677   | 1.296  | 0.000          | 0.000  | 1372           | 1447                    | 6.37     | 2427      | 3.5      | 0.9      |
| LX-10                     | LX-10                                      | -31                        | [c]       | 1.417                       | 2.660  | 2.566 | 2.566                       | 3.3           | CHNOX     | 3.0          | 0.799 | 1.330               | 0.618   | 1.283  | 0.000          | 0.000  | 1239           | 1319                    | 6.37     | 2306      | 3.5      | 0.9      |
| LX-11                     | LX-11                                      | -307                       | [c]       | 1.615                       | 2.535  | 2.161 | 2.161                       | 13.2          | CHNOX     | 3.0          | 1.168 | 1.268               | 0.447   | 1.081  | 0.000          | 0.000  | 729            | 846                     | 6.17     | 1769      | 3.4      | 1.2      |
| LX-14                     | LX-14                                      | 15                         | [c]       | 1.521                       | 2.917  | 2.588 | 2.659                       | 0.0           | CHNO      | 3.0          | 0.921 | 1.459               | 0.600   | 1.294  | 0.000          | 0.000  | 1331           | 1423                    | 6.51     | 2390      | 3.4      | 0.9      |
| LX-15                     | LX-15                                      | -30                        | [c]       | 3.051                       | 1.290  | 1.266 | 2.532                       | 3.8           | CHNOX     | 3.0          | 2.107 | 0.645               | 0.943   | 0.633  | 0.000          | 0.000  | 1019           | 1230                    | 6.95     | 2091      | 2.8      | 1.0      |
| LX-17                     | LX-17                                      | -237                       | [c]       | 2.295                       | 2.186  | 2.150 | 2.150                       | 5.7           | CHNOX     | 3.0          | 1.767 | 1.093               | 0.528   | 1.075  | 0.000          | 0.000  | 71             |                         |          |           |          |          |

PREDICTIVE MODEL FOR EXPLOSIVE DETONATION PARAMETERS FROM AN EQUATION OF STATE BASED ON DETONATION VELOCITY. Physical Chemistry Chemical Physics 2022

DEoS DATABASE

Average values

$$W = \left( \frac{\partial D}{\partial \rho_o} \right) Q$$

$Q_{DeoS}$  (cal/g) 1160  
 $w$  (m/s per kg/m<sup>3</sup>) 3.37  
 $Do$  (m/s) 2215  
 $C$  (m/s per cal/g) 1.0  
 $C = \left( \frac{\partial D}{\partial Q} \right) \rho_o$

| EXPLOSIVES                  |                                                  | 238                              |           | CHNO Composition (mol/100g) |       |       |       | Other elements (% weight X) |       | hierarchy    |       |         |         | [C+H+P+S] as inerts |        |        |                    |                 |          |           |          |          |
|-----------------------------|--------------------------------------------------|----------------------------------|-----------|-----------------------------|-------|-------|-------|-----------------------------|-------|--------------|-------|---------|---------|---------------------|--------|--------|--------------------|-----------------|----------|-----------|----------|----------|
| Acronym                     | Name                                             | $\Delta H_{298}^{\circ}$ (cal/g) | reference | C                           | H     | N     | O     | X: (C+H+P+S)                | Comp. | type (Xlong) | C (s) | H2O (g) | CO2 (g) | N2 (g)              | HZ (g) | O2 (g) | $Q_{DeoS}$ (cal/g) | $Q_{G}$ (cal/g) | Phi (kJ) | Do (DEoS) | w (DEoS) | C (DEoS) |
| PBX-9007                    | PBX-9007                                         | 65                               | [c]       | 1.970                       | 3.218 | 2.431 | 2.440 | 0.0                         | CHNO  | 3.0          | 1.554 | 1.609   | 0.416   | 1.216               | 0.000  | 0.000  | 1230               | 1386            | 6.04     | 2298      | 3.4      | 0.9      |
| PBX-9010                    | PBX-9010                                         | -80                              | [c]       | 1.409                       | 2.480 | 2.431 | 2.431 | 7.6                         | CHNOX | 3.0          | 0.813 | 1.240   | 0.596   | 1.216               | 0.000  | 0.000  | 1115               | 1197            |          | 2188      | 3.4      | 1.0      |
| PBX-9011                    | PBX-9011                                         | -40                              | [c]       | 1.729                       | 3.181 | 2.450 | 2.607 | 0.0                         | CHNO  | 3.0          | 1.220 | 1.590   | 0.508   | 1.225               | 0.000  | 0.000  | 1235               | 1357            | 6.20     | 2302      | 3.4      | 0.9      |
| PBX-9205                    | PBX-9205                                         | 58                               | [c]       | 1.826                       | 3.141 | 2.485 | 2.506 | 0.0                         | CHNO  | 3.0          | 1.359 | 1.570   | 0.468   | 1.243               | 0.000  | 0.000  | 1270               | 1406            | 6.21     | 2334      | 3.4      | 0.9      |
| PBX-9404                    | PBX-9404                                         | 8                                | [c]       | 1.401                       | 2.745 | 2.565 | 2.690 | 1.4                         | CHNOX | 3.0          | 0.743 | 1.373   | 0.659   | 1.282               | 0.000  | 0.000  | 1346               | 1420            |          | 2400      | 3.5      | 0.9      |
| PBX-9407                    | PBX-9407                                         | 8                                | [c]       | 1.412                       | 2.668 | 2.539 | 2.539 | 4.2                         | CHNOX | 3.0          | 0.810 | 1.334   | 0.603   | 1.270               | 0.000  | 0.000  | 1265               | 1346            |          | 2330      | 3.5      | 0.9      |
| PBX-9408                    | PBX-9408                                         | 12                               | [c]       | 1.426                       | 2.781 | 2.574 | 2.679 | 1.2                         | CHNOX | 3.0          | 0.782 | 1.391   | 0.644   | 1.287               | 0.000  | 0.000  | 1344               | 1422            |          | 2401      | 3.5      | 0.9      |
| PBX9501                     | PBX9501                                          | 22                               | [c]       | 1.467                       | 2.850 | 2.603 | 2.690 | 0.0                         | CHNO  | 3.0          | 0.835 | 1.425   | 0.633   | 1.301               | 0.000  | 0.000  | 1358               | 1441            | 6.60     | 2414      | 3.5      | 0.9      |
| PBX9502                     | PBX9502                                          | -206                             | [c]       | 2.305                       | 2.722 | 2.208 | 2.208 | 3.8                         | CHNOX | 3.0          | 1.759 | 1.116   | 0.546   | 1.104               | 0.000  | 0.000  | 777                | 953             |          | 1826      | 3.2      | 1.2      |
| PBX9503                     | PBX9503                                          | -375                             | [c]       | 2.159                       | 2.289 | 2.265 | 2.265 | 3.8                         | CHNOX | 3.0          | 1.599 | 1.144   | 0.560   | 1.132               | 0.000  | 0.000  | 853                | 1013            |          | 1914      | 3.2      | 1.1      |
| pent                        | penterythritol tetranitrate                      | -407                             | [8]       | 1.582                       | 2.531 | 1.265 | 3.796 | 0.0                         | CHNO  | 2.0          | 0.316 | 1.265   | 1.165   | 0.633               | 0.000  | 0.000  | 1483               | 1514            | 6.79     | 2523      | 3.3      | 0.9      |
| PENTOLITE                   | PENTOLITE                                        | -243                             | [c]       | 2.332                       | 2.366 | 1.293 | 3.219 | 0.0                         | CHNO  | 3.0          | 1.314 | 1.183   | 1.018   | 0.647               | 0.000  | 0.000  | 1267               | 1398            |          | 2332      | 3.1      | 0.9      |
| PETN/TNT (20/80)            | PETN/TNT (20/80)                                 | -144                             | [c]       | 2.782                       | 2.267 | 1.310 | 2.872 | 0.0                         | CHNO  | 3.0          | 1.912 | 1.134   | 0.869   | 0.655               | 0.000  | 0.000  | 1168               | 1329            | 5.22     | 2210      | 3.0      | 1.0      |
| PETN/TNT (60/40)            | PETN/TNT (60/40)                                 | -276                             | [c]       | 2.182                       | 2.399 | 1.287 | 3.334 | 0.0                         | CHNO  | 3.0          | 1.114 | 1.199   | 1.067   | 0.644               | 0.000  | 0.000  | 1310               | 1422            |          | 2371      | 3.1      | 0.9      |
| PETN/TNT/RDX (20/30/50)     | PETN/TNT/RDX (20/30/50)                          | -72                              | [c]       | 1.916                       | 2.517 | 2.000 | 2.902 | 0.0                         | CHNO  | 3.0          | 1.094 | 1.259   | 0.822   | 1.000               | 0.000  | 0.000  | 1319               | 1429            | 6.18     | 2379      | 3.3      | 0.9      |
| pf                          | 1-fluoro-2,4,6-trinitrobenzene                   | -268                             | [8]       | 2.596                       | 0.865 | 1.298 | 2.596 | 8.2                         | CHNOX | 3.0          | 1.515 | 0.433   | 1.082   | 0.649               | 0.000  | 0.000  | 848                | 999             |          | 1908      | 2.9      | 1.1      |
| PICRATOL                    | PICRATOL                                         | -236                             | [c]       | 2.747                       | 2.324 | 1.479 | 2.747 | 0.0                         | CHNO  | 3.0          | 1.955 | 1.162   | 0.792   | 0.740               | 0.000  | 0.000  | 985                | 1181            | 4.93     | 2056      | 3.0      | 1.0      |
| picric                      | trinitrophenol                                   | -224                             | [8]       | 2.619                       | 1.309 | 1.309 | 3.055 | 0.0                         | CHNO  | 3.0          | 1.419 | 0.655   | 1.200   | 0.655               | 0.000  | 0.000  | 1142               | 1283            | 5.17     | 2213      | 3.0      | 1.0      |
| ppam                        | n-(2,2-nitropropyl)-n,2,2-trinitro-1-propanamine | -170                             | [48]      | 1.839                       | 3.066 | 1.839 | 3.066 | 0.0                         | CHNO  | 3.0          | 1.073 | 1.533   | 0.766   | 0.920               | 0.000  | 0.000  | 1330               | 1437            | 6.35     | 2389      | 3.3      | 0.9      |
| PRNO/HMX/CARNAUBA (30/68/2) | PRNO/HMX/CARNAUBA (30/68/2)                      | -73                              | [c]       | 1.882                       | 4.175 | 2.658 | 2.247 | 0.0                         | CHNO  | 3.0          | 1.802 | 2.087   | 0.080   | 1.329               | 0.000  | 0.000  | 1029               | 1209            | 5.76     | 2101      | 3.5      | 1.0      |
| PRNO/NQ/HMX (34/35/31)      | PRNO/NQ/HMX (34/35/31)                           | -179                             | [c]       | 1.686                       | 4.509 | 3.113 | 1.975 | 0.0                         | CHNO  | 5.0          | 1.686 | 1.975   | 0.000   | 1.557               | 0.279  | 0.000  | 794                | 962             | 5.41     | 1846      | 3.6      | 1.2      |
| PYX/PE (95/5)               | PYX/PE (95/5)                                    | 35                               | [c]       | 2.902                       | 1.625 | 1.682 | 2.497 | 0.0                         | CHNO  | 3.0          | 2.060 | 0.813   | 0.842   | 0.841               | 0.000  | 0.000  | 1091               | 1297            | 4.94     | 2164      | 3.0      | 1.0      |
| rdx                         | cyclodimethylenetetramine                        | 66                               | [8]       | 1.351                       | 2.701 | 2.701 | 2.701 | 0.0                         | CHNO  | 3.0          | 0.675 | 1.351   | 0.675   | 1.351               | 0.000  | 0.000  | 1415               | 1482            | 6.78     | 2464      | 3.5      | 0.9      |
| RDX/ESTANE (80/20)          | RDX/ESTANE (80/20)                               | -137                             | [c]       | 2.107                       | 3.660 | 2.199 | 2.513 | 0.0                         | CHNO  | 3.0          | 1.766 | 1.830   | 0.341   | 1.099               | 0.000  | 0.000  | 1065               | 1242            | 5.66     | 2138      | 3.3      | 1.0      |
| RDX/EVA (80/20)             | RDX/EVA (80/20)                                  | 66                               | [c]       | 2.291                       | 4.380 | 2.161 | 2.363 | 0.0                         | CHNO  | 3.0          | 2.204 | 2.190   | 0.086   | 1.081               | 0.000  | 0.000  | 1192               | 1450            | 5.90     | 2262      | 3.4      | 0.9      |
| RDX/EVA (95/5)              | RDX/EVA (95/5)                                   | 66                               | [c]       | 1.586                       | 3.121 | 2.566 | 2.617 | 0.0                         | CHNO  | 3.0          | 1.058 | 1.560   | 0.528   | 1.283               | 0.000  | 0.000  | 1359               | 1465            | 6.57     | 2415      | 3.4      | 0.9      |
| RDX/EXON (90/10)            | RDX/EXON (90/10)                                 | -30                              | [c]       | 1.452                       | 2.646 | 2.434 | 2.434 | 6.9                         | CHNOX | 3.0          | 0.897 | 1.323   | 0.555   | 1.217               | 0.000  | 0.000  | 1168               | 1257            |          | 2239      | 3.4      | 1.0      |
| RDX/GAP (84/16)             | RDX/GAP (84/16)                                  | 214                              | [4]       | 1.657                       | 3.214 | 2.708 | 2.433 | 0.0                         | CHNO  | 3.0          | 1.244 | 1.607   | 0.413   | 1.354               | 0.000  | 0.000  | 1407               | 1531            | 6.63     | 2457      | 3.5      | 0.9      |
| RDX/HTPB (80/20)            | RDX/HTPB (80/20)                                 | 52                               | [c]       | 2.512                       | 4.410 | 2.180 | 2.178 | 0.0                         | CHNO  | 4.0          | 2.512 | 2.178   | 0.000   | 1.090               | 0.027  | 0.000  | 1060               | 1311            | 5.49     | 2133      | 3.3      | 1.0      |
| RDX/HTPB (82/18)            | RDX/HTPB (82/18)                                 | 25                               | [c]       | 2.352                       | 4.243 | 2.228 | 2.266 | 0.0                         | CHNO  | 3.0          | 2.280 | 2.121   | 0.072   | 1.114               | 0.000  | 0.000  | 1092               | 1320            | 5.63     | 2165      | 3.3      | 1.0      |
| RDX/HTPB (85/15)            | RDX/HTPB (85/15)                                 | 56                               | [c]       | 2.222                       | 3.983 | 2.310 | 2.309 | 0.0                         | CHNO  | 3.0          | 2.063 | 1.992   | 0.159   | 1.155               | 0.000  | 0.000  | 1150               | 1356            | 5.81     | 2221      | 3.4      | 1.0      |
| RDX/PIB (91/9)              | RDX/PIB (91/9)                                   | 33                               | [c]       | 1.818                       | 3.578 | 2.458 | 2.508 | 0.0                         | CHNO  | 3.0          | 1.459 | 1.789   | 0.359   | 1.229               | 0.000  | 0.000  | 1260               | 1405            | 6.26     | 2325      | 3.4      | 0.9      |
| RDX/SYLGARD (85/15)         | RDX/SYLGARD (85/15)                              | -224                             | [3]       | 1.529                       | 3.407 | 2.487 | 2.487 | 6.1                         | CHNOX | 3.0          | 1.137 | 1.704   | 0.322   | 1.155               | 0.000  | 0.000  | 1016               | 1130            |          | 2098      | 3.5      | 1.0      |
| RDX/TATB/HTPB (65/20/15)    | RDX/TATB/HTPB (65/20/15)                         | 14                               | [c]       | 2.417                       | 3.908 | 2.235 | 2.234 | 0.0                         | CHNO  | 3.0          | 2.277 | 1.954   | 0.140   | 1.117               | 0.000  | 0.000  | 1047               | 1275            | 5.45     | 2120      | 3.3      | 1.0      |
| RDX/TATB/HTPB (70/15/15)    | RDX/TATB/HTPB (70/15/15)                         | 24                               | [c]       | 2.368                       | 3.927 | 2.253 | 2.252 | 0.0                         | CHNO  | 3.0          | 2.223 | 1.963   | 0.145   | 1.127               | 0.000  | 0.000  | 1073               | 1295            | 5.54     | 2146      | 3.3      | 1.0      |
| RDX/TATB/HTPB (75/10/15)    | RDX/TATB/HTPB (75/10/15)                         | 35                               | [c]       | 2.319                       | 3.945 | 2.272 | 2.271 | 0.0                         | CHNO  | 3.0          | 2.170 | 1.973   | 0.149   | 1.136               | 0.000  | 0.000  | 1098               | 1315            | 5.63     | 2171      | 3.3      | 1.0      |
| RDX/TFNA (65/35)            | RDX/TFNA (65/35)                                 | -189                             | [c]       | 1.512                       | 2.643 | 2.263 | 2.516 | 7.2                         | CHNOX | 3.0          | 0.914 | 1.322   | 0.597   | 1.131               | 0.000  | 0.000  | 1045               | 1137            |          | 2118      | 3.4      | 1.0      |
| RDX/TNT (30/70)             | RDX/TNT (30/70)                                  | -35                              | [c]       | 2.563                       | 2.351 | 1.735 | 2.660 | 0.0                         | CHNO  | 3.0          | 1.821 | 1.176   | 0.742   | 0.867               | 0.000  | 0.000  | 1160               | 1342            | 5.40     | 2232      | 3.1      | 1.0      |
| RDX/TNT (50/50)             | RDX/TNT (50/50)                                  | -6                               | [c]       | 2.216                       | 2.451 | 2.011 | 2.671 | 0.0                         | CHNO  | 3.0          | 1.493 | 1.226   | 0.723   | 1.006               | 0.000  | 0.000  | 1233               | 1382            | 5.79     | 2300      | 3.2      | 0.9      |
| RDX/TNT (60/40)             | RDX/TNT (60/40)                                  | 8                                | [c]       | 2.043                       | 2.501 | 2.149 | 2.677 | 0.0                         | CHNO  | 3.0          | 1.330 | 1.251   | 0.713   | 1.075               | 0.000  | 0.000  | 1269               | 1402            | 5.98     | 2334      | 3.3      | 0.9      |
| RDX/TNT (64/36)             | RDX/TNT (64/36)                                  | 14                               | [c]       | 1.974                       | 2.521 | 2.204 | 2.680 | 0.0                         | CHNO  | 3.0          | 1.264 | 1.261   | 0.710   | 1.102               | 0.000  | 0.000  | 1284               | 1410            | 6.06     | 2347      | 3.3      | 0.9      |
| RDX/TNT (65/35)             | RDX/TNT (65/35)                                  | 16                               | [c]       | 1.957                       | 2.526 | 2.218 | 2.680 | 0.0                         | CHNO  | 3.0          | 1.248 | 1.263   | 0.709   | 1.109               | 0.000  | 0.000  | 1287               | 1412            | 6.08     | 2351      | 3.3      | 0.9      |
| RDX/TNT (70/30)             | RDX/TNT (70/30)                                  | 23                               | [c]       | 1.870                       | 2.551 | 2.287 | 2.683 | 0.0                         | CHNO  | 3.0          | 1.166 | 1.276   | 0.704   | 1.144               | 0.000  | 0.000  | 1306               | 1422            | 6.18     | 2367      | 3.3      | 0.9      |
| RDX/TNT (75/25)             | RDX/TNT (75/25)                                  | 30                               | [c]       | 1.783                       | 2.576 | 2.356 | 2.686 | 0.0                         | CHNO  | 3.0          | 1.084 | 1.288   | 0.699   | 1.178               | 0.000  | 0.000  | 1324               | 1432            | 6.28     | 2384      | 3.3      | 0.9      |
| RDX/TNT (77/23)             | RDX/TNT (77/23)                                  | 33                               | [c]       | 1.749                       | 2.586 | 2.384 | 2.688 | 0.0                         | CHNO  | 3.0          | 1.052 | 1.293   | 0.697   | 1.192               | 0.000  | 0.000  | 1331               | 1436            | 6.32     | 2390      | 3.4      | 0.9      |
| RDX/TNT (78/22)             | RDX/TNT (78/22)                                  | 34                               | [c]       | 1.732                       | 2.591 | 2.398 | 2.688 | 0.0                         | CHNO  | 3.0          | 1.035 | 1.296   | 0.696   | 1.199               | 0.000  | 0.000  | 1335               | 1438            | 6.34     | 2393      | 3.4      | 0.9      |
| RDX/TNT (80/20)             | RDX/TNT (80/20)                                  | 37                               | [c]       | 1.697                       | 2.601 | 2.425 | 2.699 | 0.0                         | CHNO  | 3.0          | 1.003 | 1.301   | 0.694   | 1.213               | 0.000  | 0.000  | 1342               | 1442            | 6.38     | 2400      | 3.4      | 0.9      |
| RDX/TNT (90/10)             | RDX/TNT (90/10)                                  | 52                               | [c]       | 1.524                       | 2.651 | 2.563 | 2.695 | 0.0                         | CHNO  |              |       |         |         |                     |        |        |                    |                 |          |           |          |          |

DEoS DATABASE

| EXPLOSIVES           |                                | 238                        | CHNO Composition (mol/100g) |       |       |       | Other elements (% weight X) |               | Comp.        |       | Hierarchy |         | [C+F+P+Si] as inerts |        | Average values |                | $W = \left(\frac{\partial D}{\partial \rho_0}\right)_Q$<br>$C = \left(\frac{\partial D}{\partial Q}\right)_{\rho_0}$ |          |           |          |          |     |
|----------------------|--------------------------------|----------------------------|-----------------------------|-------|-------|-------|-----------------------------|---------------|--------------|-------|-----------|---------|----------------------|--------|----------------|----------------|----------------------------------------------------------------------------------------------------------------------|----------|-----------|----------|----------|-----|
| Acronym              | Name                           | $\Delta H_{298}^0$ (cal/g) | reference                   | C     | H     | N     | O                           | X: (C F P Si) | type (Xiong) | C (s) | H2O (g)   | CO2 (g) | N2 (g)               | H2 (g) | O2 (g)         | Q_DEoS (cal/g) | Q <sub>0i</sub> (cal/g)                                                                                              | Phi (KJ) | Do (DEoS) | w (DEoS) | C (DEoS) |     |
| tmm                  | tetranitromethane              | 45                         | [47]                        | 0.510 | 0.000 | 2.040 | 4.081                       | 0.0           | CNO          | 1.0   | 0.000     | 0.000   | 0.510                | 1.020  | 0.000          | 1.530          | 525                                                                                                                  | 525      | 4.01      | 1501     | 3.1      | 1.4 |
| TNM/BENZ (76.4/23.6) | TNM/BENZ (76.4/23.6)           | 70                         | [c]                         | 2.202 | 1.813 | 1.559 | 3.118                       | 0.0           | CHNO         | 2.0   | 1.097     | 0.906   | 1.106                | 0.779  | 0.000          | 0.000          | 1524                                                                                                                 | 1634     | 6.29      | 2557     | 3.1      | 0.8 |
| TNM/NM (0.071/1)     | TNM/NM (0.071/1)               | -352                       | [c]                         | 1.429 | 4.002 | 1.713 | 3.426                       | 0.0           | CHNO         | 3.0   | 0.716     | 2.001   | 0.712                | 0.856  | 0.000          | 0.000          | 1403                                                                                                                 | 1474     | 6.94      | 2454     | 3.5      | 0.9 |
| TNM/NM (0.25/1)      | TNM/NM (0.25/1)                | -226                       | [c]                         | 1.136 | 2.726 | 1.817 | 3.635                       | 0.0           | CHNO         | 2.0   | 0.000     | 1.363   | 1.136                | 0.909  | 0.000          | 0.000          | 1630                                                                                                                 | 1630     | 7.45      | 2645     | 3.4      | 0.8 |
| TNM/NM (0.5/1)       | TNM/NM (0.5/1)                 | -142                       | [c]                         | 0.943 | 1.886 | 1.886 | 3.772                       | 0.0           | CHNO         | 1.0   | 0.000     | 0.943   | 0.943                | 0.943  | 0.000          | 0.472          | 1290                                                                                                                 | 1290     | 6.52      | 2353     | 3.3      | 0.9 |
| TNM/NM (60/40)       | TNM/NM (60/40)                 | -684                       | [c]                         | 1.554 | 4.993 | 1.224 | 3.697                       | 0.0           | CHNO         | 3.0   | 0.954     | 2.497   | 0.600                | 0.612  | 0.000          | 0.000          | 1228                                                                                                                 | 1323     | 6.59      | 2295     | 3.5      | 0.9 |
| TNM/NM (70/30)       | TNM/NM (70/30)                 | -502                       | [c]                         | 1.293 | 3.745 | 1.428 | 3.793                       | 0.0           | CHNO         | 2.0   | 0.333     | 1.873   | 0.960                | 0.714  | 0.000          | 0.000          | 1450                                                                                                                 | 1483     | 7.11      | 2495     | 3.4      | 0.9 |
| TNM/NM (80/20)       | TNM/NM (80/20)                 | -320                       | [c]                         | 1.032 | 2.497 | 1.632 | 3.889                       | 0.0           | CHNO         | 1.0   | 0.000     | 1.248   | 1.032                | 0.816  | 0.000          | 0.288          | 1373                                                                                                                 | 1373     | 6.82      | 2427     | 3.3      | 0.9 |
| TNM/NM (90/10)       | TNM/NM (90/10)                 | -137                       | [c]                         | 0.771 | 1.248 | 1.836 | 3.985                       | 0.0           | CHNO         | 1.0   | 0.000     | 0.624   | 0.771                | 0.918  | 0.000          | 0.909          | 949                                                                                                                  | 949      | 5.53      | 2018     | 3.1      | 1.1 |
| tnt                  | 2,4,6-trinitrotoluene          | -78                        | [47]                        | 3.082 | 2.201 | 1.321 | 2.642                       | 0.0           | CHNO         | 3.0   | 2.311     | 1.101   | 0.770                | 0.660  | 0.000          | 0.000          | 1051                                                                                                                 | 1282     | 4.84      | 2124     | 2.9      | 1.0 |
| TNT/FOX-12(50/50)    | TNT/FOX-12(50/50)              | -242                       | [c]                         | 2.019 | 2.774 | 2.334 | 2.516                       | 0.0           | CHNO         | 3.0   | 1.455     | 1.387   | 0.565                | 1.167  | 0.000          | 0.000          | 945                                                                                                                  | 1090     | 5.30      | 2014     | 3.3      | 1.1 |
| tntab                | trinitrotriazidobenzene        | 803                        | [8]                         | 1.785 | 0.000 | 3.570 | 1.785                       | 0.0           | CNO          | 3.0   | 0.892     | 0.000   | 0.892                | 1.785  | 0.000          | 0.000          | 1553                                                                                                                 | 1643     | 6.27      | 2582     | 3.5      | 0.8 |
| tntmta               | trinitrosotrimethylenetriamine | 387                        | [48]                        | 1.723 | 3.446 | 3.446 | 1.723                       | 0.0           | CHNO         | 4.0   | 1.723     | 1.723   | 0.000                | 1.723  | 0.000          | 0.000          | 1211                                                                                                                 | 1383     | 6.15      | 2279     | 3.5      | 0.9 |
| TO/NM (14.5/85.5)    | TO/NM (14.5/85.5)              | -374                       | [c]                         | 2.502 | 5.461 | 1.401 | 2.801                       | 0.0           | CHNO         | 3.0   | 2.467     | 2.731   | 0.035                | 0.700  | 0.000          | 0.000          | 991                                                                                                                  | 1238     | 5.49      | 2062     | 3.3      | 1.0 |
| tnh                  | 1,3,4,6-tetranitroglycouril    | 31                         | [48]                        | 1.242 | 0.621 | 2.484 | 3.105                       | 0.0           | CHNO         | 1.0   | 0.000     | 0.310   | 1.242                | 1.242  | 0.000          | 0.155          | 1378                                                                                                                 | 1378     | 6.38      | 2432     | 3.3      | 0.9 |
| X-0341               | X-0341                         | -196                       | [c]                         | 2.259 | 2.250 | 2.226 | 2.226                       | 3.8           | CHNOX        | 1.708 | 1.125     | 0.550   | 1.113                | 0.000  | 0.000          | 801            | 972                                                                                                                  | 1854     | 3.2       | 1.2      |          |     |
| X-0342               | X-0342                         | -186                       | [c]                         | 2.212 | 2.268 | 2.244 | 2.244                       | 3.8           | CHNOX        | 1.657 | 1.134     | 0.555   | 1.122                | 0.000  | 0.000          | 825            | 991                                                                                                                  | 1882     | 3.2       | 1.1      |          |     |
| X-0343               | X-0343                         | -177                       | [c]                         | 2.166 | 2.286 | 2.262 | 2.262                       | 3.8           | CHNOX        | 1.607 | 1.143     | 0.559   | 1.131                | 0.000  | 0.000          | 850            | 1010                                                                                                                 | 1909     | 3.2       | 1.1      |          |     |
| X-0344               | X-0344                         | -157                       | [c]                         | 2.074 | 2.322 | 2.298 | 2.298                       | 3.8           | CHNOX        | 1.505 | 1.161     | 0.568   | 1.149                | 0.000  | 0.000          | 898            | 1048                                                                                                                 | 1963     | 3.3       | 1.1      |          |     |

DEoS DATABASE

Number of Explosives 238

| Number of Explosives | Number of data |     | residuals D         |      |      | residuals P         |       |       | Gamma ( $\gamma$ ) correlation (CHNO explosives) |      |                | Jones and Grüneisen parameters (DEoS Model) |          |  |
|----------------------|----------------|-----|---------------------|------|------|---------------------|-------|-------|--------------------------------------------------|------|----------------|---------------------------------------------|----------|--|
|                      | D              | P   | Statistics velocity |      |      | Statistics pressure |       |       | r                                                |      | average values | $\alpha$                                    | $\Gamma$ |  |
| KJ (only CHNO)       | 449            | 224 | RMRS                | 3.4% | 1.7% | RMRS                | 7.0%  | 6.0%  | 0.44                                             | 0.53 | 0.27           | 0.60                                        |          |  |
| DEoS                 | 519            | 263 | MAPR                | 2.5% | 1.3% | MAPR                | 5.6%  | 4.9%  |                                                  |      | 0.02           | 0.06                                        |          |  |
|                      |                |     | P97.5               | 8.2% | 3.9% | P97.5               | 17.0% | 12.6% |                                                  |      |                |                                             |          |  |

| Acr                      | experimental data |            |             | calculated D |           |              |        |          |            | calculated P  |        |          |      | $\gamma_{experimental}$ | $\gamma_{KJ}$ | $\gamma_{DEoS}$ | $\alpha$ | $\Gamma$ |
|--------------------------|-------------------|------------|-------------|--------------|-----------|--------------|--------|----------|------------|---------------|--------|----------|------|-------------------------|---------------|-----------------|----------|----------|
|                          | density (g/cc)    | Dexp (m/s) | Pexp (kbar) | reference    | DKI (m/s) | D_DEoS (m/s) | RRD_KJ | RRD_DEoS | Pki (kbar) | P_DEoS (kbar) | RRP_KJ | RRP_DEoS |      |                         |               |                 |          |          |
| abh                      | 1.64              | 7200       | nan         | [8]          | 7269      | 7138         | 1.0%   | -0.9%    | 221        | 223           |        |          |      |                         |               | 0.25            | 0.54     |          |
| abh                      | 1.78              | 7600       | nan         | [48]         | 7692      | 7545         | 1.2%   | -0.7%    | 261        | 267           |        |          |      |                         |               | 0.25            | 0.57     |          |
| AFX902                   | 1.74              | 8340       | 290         | [8]          |           | 8191         |        | -1.8%    |            | 279           |        | -3.9%    |      |                         |               | 0.33            | 0.80     |          |
| bchmx                    | 1.78              | 8780       | nan         | [40]         | 8807      | 8660         | 0.3%   | -1.4%    | 342        | 346           |        |          |      |                         |               | 0.26            | 0.60     |          |
| bchmx                    | 1.79              | 8650       | nan         | [4]          | 8842      | 8694         | 2.2%   | 0.5%     | 346        | 350           |        |          |      |                         |               | 0.26            | 0.60     |          |
| BCHMX/GAP (84/16)        | 1.62              | 8292       | nan         | [4]          | 8173      | 8078         | -1.4%  | -2.6%    | 278        | 279           |        |          |      |                         |               | 0.25            | 0.57     |          |
| BCHMX/PIB (91/9)         | 1.66              | 8266       | nan         | [44]         | 8066      | 8023         | -2.4%  | -2.9%    | 275        | 278           |        |          |      |                         |               | 0.26            | 0.59     |          |
| BCHMX/SVLGARD (85/15)    | 1.58              | 7858       | nan         | [3]          |           | 7612         |        | -3.1%    |            | 236           |        |          |      |                         |               | 0.27            | 0.61     |          |
| BCHMX/VITON (95/5)       | 1.78              | 8520       | nan         | [24]         |           | 8464         |        | -0.7%    |            | 328           |        |          |      |                         |               | 0.27            | 0.61     |          |
| BCHMX/VITON (95/5)       | 1.82              | 8740       | nan         | [24]         |           | 8600         |        | -1.6%    |            | 344           |        |          |      |                         |               | 0.27            | 0.62     |          |
| BCHMX/VITON (97/3)**     | 1.79              | 8650       | nan         | [3]          |           | 8578         |        | -0.8%    |            | 339           |        |          |      |                         |               | 0.27            | 0.61     |          |
| btf                      | 1.76              | 8260       | nan         | [8]          | 8023      | 8250         | -2.9%  | -0.1%    | 282        | 315           |        |          |      |                         |               | 0.26            | 0.57     |          |
| btf                      | 1.82              | NaN        | 338         | [2]          | 8213      | 8443         |        |          | 301        | 339           | -10.9% | 0.3%     |      |                         |               | 0.26            | 0.58     |          |
| btf                      | 1.84              | NaN        | 345         | [2]          | 8276      | 8507         |        |          | 308        | 347           | -10.8% | 0.7%     |      |                         |               | 0.26            | 0.58     |          |
| btf                      | 1.85              | 8490       | 340         | [8]          | 8308      | 8539         | -2.1%  | 0.6%     | 311        | 351           | -8.5%  | 3.4%     | 2.92 | 3.10                    | 2.84          | 0.26            | 0.59     |          |
| btf                      | 1.86              | 8490       | 360         | [8]          | 8340      | 8572         | -1.8%  | 1.0%     | 315        | 356           | -12.6% | -1.2%    | 2.72 | 3.11                    | 2.84          | 0.26            | 0.59     |          |
| btf                      | 1.90              | 8620       | nan         | [46]         | 8467      | 8701         | -1.8%  | 0.9%     | 328        | 373           |        |          |      |                         |               | 0.26            | 0.60     |          |
| btneu                    | 1.27              | 6130       | nan         | [30]         | 6676      | 6354         | 8.9%   | 3.7%     | 156        | 140           |        |          |      |                         |               | 0.24            | 0.51     |          |
| btneu                    | 1.41              | 6880       | nan         | [30]         | 7135      | 6800         | 3.7%   | -1.2%    | 193        | 175           |        |          |      |                         |               | 0.24            | 0.53     |          |
| btneu                    | 1.63              | 7650       | nan         | [30]         | 7855      | 7499         | 2.7%   | -2.0%    | 257        | 240           |        |          |      |                         |               | 0.26            | 0.58     |          |
| btneu                    | 1.84              | 8460       | nan         | [50]         | 8556      | 8179         | 1.1%   | -3.3%    | 329        | 316           |        |          |      |                         |               | 0.27            | 0.62     |          |
| btneu                    | 1.87              | 8500       | nan         | [30]         | 8641      | 8262         | 1.7%   | -2.8%    | 339        | 327           |        |          |      |                         |               | 0.27            | 0.62     |          |
| btneu                    | 1.88              | NaN        | 364         | [29]         | 8677      | 8297         |        |          | 343        | 331           | -5.8%  | -9.0%    |      |                         |               | 0.27            | 0.62     |          |
| btneu                    | 1.91              | 8660       | nan         | [30]         | 8772      | 8389         | 1.3%   | -3.1%    | 353        | 343           |        |          |      |                         |               | 0.27            | 0.63     |          |
| btneu                    | 1.92              | 8780       | nan         | [50]         | 8805      | 8421         | 0.3%   | -4.1%    | 357        | 347           |        |          |      |                         |               | 0.28            | 0.63     |          |
| btneu                    | 1.93              | 8657       | 357.6       | [55]         | 8821      | 8437         | 1.9%   | -2.5%    | 359        | 349           | 0.4%   | -2.4%    | 3.03 | 3.17                    | 2.93          | 0.28            | 0.63     |          |
| btneu                    | 1.95              | 8800       | nan         | [30]         | 8903      | 8516         | 1.2%   | -3.2%    | 368        | 359           |        |          |      |                         |               | 0.28            | 0.64     |          |
| btneu                    | 1.96              | 8850       | nan         | [48]         | 8936      | 8548         | 1.0%   | -3.4%    | 372        | 364           |        |          |      |                         |               | 0.28            | 0.64     |          |
| BTNEU/BTF (60/40)        | 1.86              | 8700       | nan         | [50]         | 9043      | 8676         | 3.9%   | -0.3%    | 370        | 367           |        |          |      |                         |               | 0.26            | 0.57     |          |
| BTNEU/HMX (30/70)        | 1.91              | 9020       | nan         | [50]         | 9316      | 9125         | 3.3%   | 1.2%     | 399        | 407           |        |          |      |                         |               | 0.27            | 0.62     |          |
| BTNEU/HMX (32/68)        | 1.88              | 8884       | nan         | [55]         | 9229      | 9030         | 3.9%   | 1.6%     | 388        | 394           |        |          |      |                         |               | 0.27            | 0.62     |          |
| BTNEU/RDX (56/44)        | 1.85              | 8701       | nan         | [55]         | 9226      | 8923         | 6.0%   | 2.6%     | 383        | 381           |        |          |      |                         |               | 0.26            | 0.60     |          |
| btneu                    | 1.86              | 9000       | nan         | [48]         | 8971      | 8714         | -0.3%  | -3.2%    | 364        | 364           |        |          |      |                         |               | 0.27            | 0.61     |          |
| bttc                     | 1.85              | 8060       | nan         | [48]         | 8258      | 7957         | 2.5%   | -1.3%    | 307        | 299           |        |          |      |                         |               | 0.27            | 0.63     |          |
| cl-20                    | 1.96              | 9440       | nan         | [44]         | 9690      | 9369         | 2.6%   | -0.7%    | 438        | 446           |        |          |      |                         |               | 0.26            | 0.60     |          |
| cl-20                    | 1.98              | 9473       | nan         | [4]          | 9761      | 9437         | 3.0%   | -0.4%    | 447        | 456           |        |          |      |                         |               | 0.27            | 0.60     |          |
| CL20/GAP (84/16)         | 1.73              | 8676       | nan         | [4]          | 8479      | 8362         | -2.3%  | -3.6%    | 311        | 316           |        |          |      |                         |               | 0.26            | 0.58     |          |
| CL-20/HTPB (91/9)        | 1.84              | 8850       | nan         | [9]          | 8857      | 8692         | 0.1%   | -1.8%    | 353        | 362           |        |          |      |                         |               | 0.26            | 0.59     |          |
| CL-20/HTPB (92/8)        | 1.86              | 9052       | nan         | [9]          | 8975      | 8793         | -0.8%  | -2.9%    | 364        | 374           |        |          |      |                         |               | 0.26            | 0.59     |          |
| CL-20/PIB (91/9)         | 1.77              | 8594       | nan         | [44]         | 8664      | 8499         | 0.8%   | -1.1%    | 330        | 334           |        |          |      |                         |               | 0.26            | 0.58     |          |
| CL20/SVLGARD (85/15)     | 1.66              | 8277       | nan         | [3]          |           | 7861         |        | -5.0%    |            | 264           |        |          |      |                         |               | 0.27            | 0.61     |          |
| COMP B                   | 1.56              | 7480       | nan         | [10]         | 7490      | 7436         | 0.1%   | -0.6%    | 227        | 227           |        |          |      |                         |               | 0.26            | 0.57     |          |
| COMP B                   | 1.61              | 7670       | nan         | [10]         | 7651      | 7600         | -0.3%  | -0.9%    | 242        | 243           |        |          |      |                         |               | 0.26            | 0.58     |          |
| COMP B                   | 1.67              | 7868       | 272         | [34]         | 7843      | 7796         | -0.3%  | -0.9%    | 261        | 264           | -4.2%  | -3.0%    | 2.80 | 2.94                    | 2.85          | 0.26            | 0.59     |          |
| COMP B                   | 1.67              | 7690       | 256.5       | [34]         | 7847      | 7800         | 2.0%   | 1.4%     | 261        | 264           | 1.7%   | 3.0%     | 2.85 | 2.94                    | 2.85          | 0.26            | 0.59     |          |
| COMP B                   | 1.67              | 7890       | 267         | [34]         | 7856      | 7810         | -0.4%  | -1.0%    | 262        | 265           | -1.9%  | -0.7%    | 2.90 | 2.95                    | 2.85          | 0.26            | 0.59     |          |
| COMP B                   | 1.69              | 7840       | 267.5       | [34]         | 7914      | 7868         | 0.9%   | 0.4%     | 268        | 272           | 0.0%   | 1.5%     | 2.89 | 2.96                    | 2.86          | 0.26            | 0.60     |          |
| COMP B                   | 1.70              | 7850       | 283         | [34]         | 7940      | 7895         | 1.1%   | 0.6%     | 270        | 274           | -4.6%  | -3.0%    | 2.70 | 2.97                    | 2.86          | 0.26            | 0.60     |          |
| COMP B                   | 1.70              | 7750       | 272         | [34]         | 7950      | 7904         | 2.6%   | 2.0%     | 271        | 276           | -0.4%  | 1.3%     | 2.76 | 2.97                    | 2.86          | 0.26            | 0.60     |          |
| COMP B                   | 1.71              | 8022       | 293         | [34]         | 7979      | 7934         | -0.5%  | -1.1%    | 274        | 279           | -6.5%  | -4.8%    | 2.76 | 2.98                    | 2.87          | 0.26            | 0.60     |          |
| COMP B                   | 1.72              | 7920       | 295         | [8]          | 8004      | 7960         | 1.1%   | 0.5%     | 276        | 282           | -6.3%  | -4.5%    | 2.66 | 2.99                    | 2.87          | 0.27            | 0.60     |          |
| COMP B                   | 1.72              | 7990       | nan         | [10]         | 8004      | 7960         | 0.2%   | -0.4%    | 276        | 282           |        |          |      |                         |               | 0.27            | 0.60     |          |
| COMP B                   | 1.73              | 7980       | 297.7       | [34]         | 8033      | 7990         | 0.7%   | 0.1%     | 279        | 285           | -6.2%  | -4.2%    | 2.70 | 2.99                    | 2.87          | 0.27            | 0.60     |          |
| COMP B                   | 1.73              | 7950       | 263         | [34]         | 8036      | 7993         | 1.1%   | 0.5%     | 280        | 285           | 6.3%   | 8.5%     | 3.16 | 3.00                    | 2.87          | 0.27            | 0.60     |          |
| COMP B                   | 1.73              | 7886       | 275         | [34]         | 8036      | 7993         | 1.9%   | 1.4%     | 280        | 285           | 1.7%   | 3.8%     | 2.91 | 3.00                    | 2.87          | 0.27            | 0.60     |          |
| COMP B                   | 1.73              | 8000       | 300         | [34]         | 8046      | 8003         | 0.6%   | 0.0%     | 281        | 287           | -6.5%  | -4.5%    | 2.70 | 3.00                    | 2.87          | 0.27            | 0.60     |          |
| COMP C3                  | 1.60              | 7630       | nan         | [8]          | 7643      | 7633         | 0.2%   | 0.0%     | 241        | 243           |        |          |      |                         |               | 0.26            | 0.59     |          |
| COMP C4                  | 1.66              | 8370       | nan         | [8]          | 7979      | 8007         | -4.7%  | -4.3%    | 269        | 275           |        |          |      |                         |               | 0.27            | 0.61     |          |
| daaf                     | 1.69              | 7930       | 306         | [17]         | 7611      | 7913         | -4.0%  | -0.2%    | 247        | 269           | -19.4% | -12.2%   | 2.46 | 2.96                    | 2.93          | 0.28            | 0.63     |          |
| DAAF/HMX/VITON (45/50/5) | 1.72              | 8120       | nan         | [35]         |           | 8054         |        | -0.8%    |            | 283           |        |          |      |                         |               | 0.28            | 0.64     |          |
| DAAF/HMX/VITON (60/35/5) | 1.70              | 7970       | nan         | [35]         |           | 7921         |        | -0.6%    |            | 270           |        |          |      |                         |               | 0.28            | 0.64     |          |
| DAAF/HMX/VITON (80/15/5) | 1.67              | 7760       | nan         | [35]         |           | 7731         |        | -0.4%    |            | 253           |        |          |      |                         |               | 0.28            | 0.65     |          |
| DAAF/RDX/VITON (60/35/5) | 1.67              | 7910       | nan         | [35]         |           | 7820         |        | -1.1%    |            | 260           |        |          |      |                         |               | 0.28            | 0.64     |          |
| DAAF/RDX/VITON (80/15/5) | 1.66              | 7760       | nan         | [35]         |           | 7698         |        | -0.8%    |            | 249           |        |          |      |                         |               | 0.28            | 0.64     |          |
| DAAF/VITON (95/5)        | 1.65              | 7660       | nan         | [35]         |           | 7596         |        | -0.8%    |            | 241           |        |          |      |                         |               | 0.28            | 0.65     |          |
| datb                     | 1.78              | 7600       | 251         | [8]          |           | 7605         | -1.3%  | 0.1%     | 248        | 261           | -1.2%  | 4.0%     | 3.10 | 3.04                    | 2.94          | 0.28            | 0.64     |          |
| datb                     | 1.79              | 7520       | 259         | [10]         |           | 7526         | 0.1%   | 1.5%     | 250        | 264           | -3.4%  | 1.8%     | 2.90 | 3.05                    | 2.95          | 0.28            | 0.64     |          |
| datb                     | 1.79              | 7585       | 257         | [34]         |           | 7532         | -0.7%  | 0.7%     | 251        | 264           | -2.4%  | 2.9%     | 3.01 | 3.05                    | 2.95          | 0.28            | 0.64     |          |
| datb                     | 1.80              | 7600       | 251         | [8]          |           | 7562         | -0.5%  | 0.9%     | 254        | 268           | 1.0%   | 6.7%     | 3.14 | 3.06                    | 2.95          | 0.28            | 0.65     |          |

DEoS DATABASE

Number of Explosives 238

|                | Number of data |     |
|----------------|----------------|-----|
|                | D              | P   |
| KJ (only CHNO) | 449            | 224 |
| DEoS           | 519            | 263 |

residuals D

| Statistics | velocity |      |
|------------|----------|------|
|            | KJ       | DEoS |
| RMRS       | 3.4%     | 1.7% |
| MAPR       | 2.5%     | 1.3% |
| P97.5      | 8.2%     | 3.9% |

residuals P

| Statistics | pressure |       |
|------------|----------|-------|
|            | KJ       | DEoS  |
| RMRS       | 7.0%     | 6.0%  |
| MAPR       | 5.6%     | 4.9%  |
| P97.5      | 17.0%    | 12.6% |

Gamma (γ) correlation (CHNO explosives)

r 0.44 0.53

Jones and Grüneisen parameters (DEoS Model)

| average values     | α    | Γ    |
|--------------------|------|------|
|                    | 0.27 | 0.60 |
| standard deviation | 0.02 | 0.06 |

| Acr                     | experimental data |            |             | reference | calculated D          |                         |                   |                     | calculated P           |                          |                   |                     | Y <sub>experimental</sub> | Y <sub>KJ</sub> | Y <sub>DEoS</sub> |
|-------------------------|-------------------|------------|-------------|-----------|-----------------------|-------------------------|-------------------|---------------------|------------------------|--------------------------|-------------------|---------------------|---------------------------|-----------------|-------------------|
|                         | density (g/cc)    | Dexp (m/s) | Pexp (kbar) |           | D <sub>KJ</sub> (m/s) | D <sub>DEoS</sub> (m/s) | RRD <sub>KJ</sub> | RRD <sub>DEoS</sub> | P <sub>KJ</sub> (kbar) | P <sub>DEoS</sub> (kbar) | RRP <sub>KJ</sub> | RRP <sub>DEoS</sub> |                           |                 |                   |
| datb                    | 1.84              | 7690       | nan         | [48]      | 7679                  | 7793                    | -0.1%             | 1.3%                | 265                    | 282                      |                   |                     |                           |                 |                   |
| degn                    | 1.38              | 6760       | nan         | [8]       | 7054                  | 6843                    | 4.4%              | 1.2%                | 185                    | 174                      |                   |                     |                           |                 |                   |
| degn                    | 1.38              | 6600       | nan         | [48]      | 7068                  | 6856                    | 7.1%              | 3.9%                | 186                    | 175                      |                   |                     |                           |                 |                   |
| dina                    | 1.00              | 5950       | nan         | [33]      | 5947                  | 5763                    | -0.1%             | -3.1%               | 102                    | 94                       |                   |                     |                           |                 |                   |
| dina                    | 1.36              | 7000       | nan         | [16]      | 7157                  | 6971                    | 2.2%              | -0.4%               | 189                    | 178                      |                   |                     |                           |                 |                   |
| dina                    | 1.48              | 7400       | nan         | [16]      | 7560                  | 7374                    | 2.2%              | -0.4%               | 224                    | 214                      |                   |                     |                           |                 |                   |
| dina                    | 1.55              | 7580       | nan         | [16]      | 7795                  | 7609                    | 2.8%              | 0.4%                | 245                    | 236                      |                   |                     |                           |                 |                   |
| dina                    | 1.60              | 7720       | nan         | [23]      | 7963                  | 7777                    | 3.1%              | 0.7%                | 261                    | 254                      |                   |                     |                           |                 |                   |
| dina                    | 1.64              | 7800       | nan         | [16]      | 8098                  | 7911                    | 3.8%              | 1.4%                | 275                    | 268                      |                   |                     |                           |                 |                   |
| dina                    | 1.67              | 8000       | nan         | [48]      | 8198                  | 8011                    | 2.5%              | 0.1%                | 285                    | 279                      |                   |                     |                           |                 |                   |
| dipam                   | 1.76              | 7400       | nan         | [8]       | 7482                  | 7452                    | 1.1%              | 0.7%                | 245                    | 253                      |                   |                     |                           |                 |                   |
| dipam                   | 1.79              | 7500       | nan         | [48]      | 7570                  | 7542                    | 0.9%              | 0.6%                | 253                    | 262                      |                   |                     |                           |                 |                   |
| dipetn                  | 1.63              | 7530       | nan         | [48]      | 7930                  | 7661                    | 5.3%              | 1.7%                | 262                    | 251                      |                   |                     |                           |                 |                   |
| dipicrylamine           | 1.60              | 7140       | nan         | [48]      | 7082                  | 6988                    | -0.8%             | -2.1%               | 207                    | 207                      |                   |                     |                           |                 |                   |
| dmtnb                   | 1.60              | 6820       | nan         | [48]      | 6972                  | 6884                    | 2.2%              | 0.9%                | 200                    | 199                      |                   |                     |                           |                 |                   |
| dmttp                   | 1.60              | 6800       | nan         | [48]      | 6816                  | 6786                    | 0.2%              | -0.2%               | 191                    | 192                      |                   |                     |                           |                 |                   |
| dnaf                    | 1.77              | 9100       | nan         | [47]      | 8938                  | 9005                    | -1.8%             | -1.0%               | 351                    | 377                      |                   |                     |                           |                 |                   |
| dnaf                    | 1.88              | 9450       | nan         | [47]      | 9325                  | 9389                    | -1.3%             | -0.6%               | 396                    | 431                      |                   |                     |                           |                 |                   |
| dnaf                    | 1.94              | 9700       | nan         | [21]      | 9536                  | 9598                    | -1.7%             | -1.0%               | 421                    | 463                      |                   |                     |                           |                 |                   |
| DNAN/RDX/NT0 (40/20/40) | 1.64              | 7190       | 220         | [53]      | 7151                  | 7256                    | -0.5%             | 0.9%                | 214                    | 220                      | -2.9%             | 0.1%                | 2.84                      | 2.91            | 2.91              |
| dnb                     | 1.49              | 6100       | nan         | [48]      | 6158                  | 6195                    | 1.0%              | 1.6%                | 149                    | 151                      |                   |                     |                           |                 |                   |
| dndmo                   | 1.52              | 7100       | nan         | [48]      | 7124                  | 7126                    | 0.3%              | 0.4%                | 202                    | 200                      |                   |                     |                           |                 |                   |
| dnff                    | 1.86              | 8930       | nan         | [35]      | 8704                  | 8880                    | -2.5%             | -0.6%               | 343                    | 381                      |                   |                     |                           |                 |                   |
| dnmt                    | 1.56              | 7850       | nan         | [35]      | 7602                  | 7598                    | -3.2%             | -3.2%               | 234                    | 237                      |                   |                     |                           |                 |                   |
| DNMT/HMX (49.5/50.5)    | 1.73              | 8390       | nan         | [35]      | 8351                  | 8322                    | -0.5%             | -0.8%               | 302                    | 309                      |                   |                     |                           |                 |                   |
| dnp                     | 1.75              | 8100       | nan         | [35]      | 8121                  | 8055                    | 0.3%              | -0.6%               | 288                    | 295                      |                   |                     |                           |                 |                   |
| dnq                     | 1.88              | 9200       | nan         | [56]      | 8892                  | 9010                    | -3.3%             | -2.1%               | 360                    | 382                      |                   |                     |                           |                 |                   |
| dntfx                   | 1.96              | 9660       | nan         | [56]      | 9500                  | 9483                    | -1.7%             | -1.8%               | 421                    | 457                      |                   |                     |                           |                 |                   |
| dp12                    | 1.26              | 5970       | 125         | [8]       |                       | 5903                    |                   | -1.1%               |                        | 114                      |                   |                     |                           | -9.1%           |                   |
| edad                    | 1.30              | 6660       | nan         | [33]      | 6620                  | 6754                    | -0.6%             | 1.4%                | 156                    | 153                      |                   |                     |                           |                 |                   |
| edad                    | 1.60              | 7670       | nan         | [48]      | 7579                  | 7862                    | -1.2%             | 2.5%                | 237                    | 246                      |                   |                     |                           |                 |                   |
| EDC-11                  | 1.78              | 8213       | 315         | [14]      | 8309                  | 8255                    | 1.2%              | 0.5%                | 304                    | 312                      | -3.4%             | -0.9%               | 2.82                      | 3.04            | 2.89              |
| EDC-24                  | 1.78              | 8710       | nan         | [14]      | 8476                  | 8491                    | -2.7%             | -2.5%               | 316                    | 327                      |                   |                     |                           |                 |                   |
| edna                    | 1.66              | 8240       | nan         | [48]      | 8122                  | 8218                    | -1.4%             | -0.3%               | 278                    | 286                      |                   |                     |                           |                 |                   |
| etdn                    | 1.48              | 7300       | nan         | [48]      | 7971                  | 7576                    | 9.2%              | 3.8%                | 249                    | 229                      |                   |                     |                           |                 |                   |
| etn                     | 1.65              | 7940       | nan         | [32]      | 8244                  | 7825                    | 3.8%              | -1.5%               | 286                    | 267                      |                   |                     |                           |                 |                   |
| etn                     | 1.68              | 7887       | nan         | [51]      | 8354                  | 7928                    | 5.9%              | 0.5%                | 297                    | 278                      |                   |                     |                           |                 |                   |
| etn                     | 1.70              | 8027       | nan         | [32]      | 8415                  | 7986                    | 4.8%              | -0.5%               | 303                    | 285                      |                   |                     |                           |                 |                   |
| etn                     | 1.70              | 7994       | nan         | [51]      | 8428                  | 7999                    | 5.4%              | 0.1%                | 305                    | 286                      |                   |                     |                           |                 |                   |
| explosive d             | 1.48              | 6700       | nan         | [8]       | 6595                  | 6604                    | -1.6%             | -1.4%               | 170                    | 168                      |                   |                     |                           |                 |                   |
| explosive d             | 1.55              | 6850       | nan         | [8]       | 6801                  | 6822                    | -0.7%             | -0.4%               | 187                    | 186                      |                   |                     |                           |                 |                   |
| explosive d             | 1.63              | 7150       | nan         | [48]      | 7035                  | 7071                    | -1.6%             | -1.1%               | 206                    | 209                      |                   |                     |                           |                 |                   |
| fefo                    | 1.59              | 7500       | 250         | [8]       |                       | 7148                    |                   | -4.7%               |                        | 209                      |                   |                     |                           | -16.5%          |                   |
| fefo                    | 1.61              | 7450       | 245         | [8]       |                       | 7212                    |                   | -3.2%               |                        | 215                      |                   |                     |                           | -12.4%          |                   |
| FM1                     | 1.51              | 6570       | 190         | [8]       |                       | 6976                    |                   | 6.2%                |                        | 191                      |                   |                     |                           | 0.7%            |                   |
| fox-12                  | 1.67              | 7970       | 261.1       | [20]      | 7539                  | 8025                    | -5.4%             | 0.7%                | 240                    | 264                      | -7.9%             | 1.2%                | 3.05                      | 2.94            | 3.06              |
| fox-7                   | 1.78              | 8375       | 284         | [54]      | 8268                  | 8395                    | -1.3%             | 0.2%                | 301                    | 316                      | 6.0%              | 11.3%               | 3.40                      | 3.04            | 2.97              |
| fox-7                   | 1.78              | 8405       | 292         | [54]      | 8268                  | 8395                    | -1.6%             | -0.1%               | 301                    | 316                      | 3.1%              | 8.3%                | 3.31                      | 3.04            | 2.97              |
| fox-7                   | 1.89              | 8870       | nan         | [56]      | 8608                  | 8760                    | -3.0%             | -1.2%               | 338                    | 361                      |                   |                     |                           |                 |                   |
| FOX-7/EVA (95.1/4.9)    | 1.69              | 8110       | 251         | [26]      | 7855                  | 7978                    | -3.1%             | -1.6%               | 263                    | 273                      | 4.8%              | 8.6%                | 3.42                      | 2.96            | 2.94              |
| FOX-7/EVA (95/5)        | 1.65              | 7730       | 241         | [26]      | 7725                  | 7838                    | -0.1%             | 1.4%                | 250                    | 258                      | 3.9%              | 7.0%                | 3.08                      | 2.92            | 2.92              |
| FOX-7/TNT (30/70)       | 1.62              | 7060       | nan         | [52]      | 7175                  | 7160                    | 1.6%              | 1.4%                | 214                    | 216                      |                   |                     |                           |                 |                   |
| FOX-7/TNT (60/40)       | 1.70              | 7600       | nan         | [52]      | 7679                  | 7712                    | 1.0%              | 1.5%                | 253                    | 259                      |                   |                     |                           |                 |                   |
| FOX-7/VITON (95/5)      | 1.85              | 8400       | nan         | [35]      |                       | 8434                    |                   | 0.4%                |                        | 326                      |                   |                     |                           |                 |                   |
| FOX-7/WAX (98.5/1.5)    | 1.76              | 8335       | nan         | [1]       | 8136                  | 8273                    | -2.4%             | -0.7%               | 289                    | 303                      |                   |                     |                           |                 |                   |
| H2O2/H2O (90.5/9.5) [*] | 1.39              | 6140       | nan         | [37]      | 5297                  | 5731                    | -13.7%            | -6.7%               | 105                    | 107                      |                   |                     |                           |                 |                   |
| ha                      | 1.20              | 7320       | nan         | [19]      | 6311                  | 7706                    | -13.8%            | 5.3%                | 134                    | 169                      |                   |                     |                           |                 |                   |
| hac                     | 1.13              | 7570       | 166         | [39]      | 7191                  | 7498                    | -5.0%             | -1.0%               | 165                    | 170                      | -0.6%             | 2.3%                | 2.89                      | 2.53            | 2.73              |
| HAC/W (60/40)           | 1.09              | 6270       | nan         | [39]      | 5861                  | 6380                    | -6.5%             | 1.8%                | 107                    | 112                      |                   |                     |                           |                 |                   |
| HAC/W (62/38)           | 1.09              | 6350       | nan         | [39]      | 5951                  | 6446                    | -6.3%             | 1.5%                | 110                    | 115                      |                   |                     |                           |                 |                   |
| HAC/W (69/31)           | 1.10              | 6630       | nan         | [39]      | 6226                  | 6655                    | -6.1%             | 0.4%                | 121                    | 125                      |                   |                     |                           |                 |                   |
| HAC/W (78/26)           | 1.11              | 7070       | nan         | [39]      | 6574                  | 6938                    | -7.0%             | -1.9%               | 136                    | 139                      |                   |                     |                           |                 |                   |
| HAC/W (88/12)           | 1.12              | 7390       | nan         | [39]      | 6875                  | 7201                    | -7.0%             | -2.6%               | 150                    | 153                      |                   |                     |                           |                 |                   |
| HAC/W (93/7)            | 1.12              | 7470       | nan         | [39]      | 7013                  | 7328                    | -6.1%             | -1.9%               | 156                    | 160                      |                   |                     |                           |                 |                   |
| HAC/W (98/2)            | 1.13              | 7540       | nan         | [39]      | 7146                  | 7454                    | -5.2%             | -1.1%               | 163                    | 167                      |                   |                     |                           |                 |                   |
| hco                     | 1.79              | 8520       | nan         | [33]      | 8748                  | 8499                    | 2.7%              | -0.2%               | 339                    | 337                      |                   |                     |                           |                 |                   |
| hmx                     | 1.00              | 5800       | 110         | [8]       | 6043                  | 5937                    | 4.2%              | 2.4%                | 105                    | 100                      | -4.1%             | -9.1%               | 2.06                      | 2.46            | 2.52              |
| hmx                     | 1.18              | 6670       | 155         | [8]       | 6658                  | 6563                    | -0.2%             | -1.6%               | 147                    | 140                      | -5.3%             | -9.6%               | 2.39                      | 2.56            | 2.63              |
| hmx                     | 1.20              | 6580       | 160         | [8]       | 6727                  | 6632                    | 2.2%              | 0.8%                | 152                    | 145                      | -5.1%             | -9.3%               | 2.25                      | 2.58            | 2.64              |

| α    | Γ    |
|------|------|
| 0.28 | 0.66 |
| 0.24 | 0.53 |
| 0.24 | 0.53 |
| 0.22 | 0.45 |
| 0.24 | 0.53 |
| 0.25 | 0.55 |
| 0.25 | 0.57 |
| 0.26 | 0.58 |
| 0.26 | 0.58 |
| 0.26 | 0.59 |
| 0.27 | 0.60 |
| 0.27 | 0.61 |
| 0.26 | 0.57 |
| 0.25 | 0.55 |
| 0.26 | 0.57 |
| 0.26 | 0.58 |
| 0.25 | 0.57 |
| 0.26 | 0.59 |
| 0.26 | 0.60 |
| 0.27 | 0.62 |
| 0.25 | 0.56 |
| 0.26 | 0.59 |
| 0.26 | 0.59 |
| 0.25 | 0.57 |
| 0.26 | 0.59 |
| 0.27 | 0.60 |
| 0.26 | 0.59 |
| 0.29 | 0.67 |
| 0.26 | 0.60 |
| 0.26 | 0.60 |
| 0.27 | 0.61 |
| 0.29 | 0.68 |
| 0.27 | 0.61 |
| 0.27 | 0.63 |
| 0.27 | 0.63 |
| 0.24 | 0.53 |
| 0.27 | 0.63 |
| 0.25 | 0.56 |
| 0.25 | 0.57 |
| 0.26 | 0.57 |
| 0.26 | 0.57 |
| 0.26 | 0.59 |
| 0.27 | 0.60 |
| 0.27 | 0.62 |
| 0.27 | 0.62 |
| 0.26 | 0.59 |
| 0.30 | 0.70 |
| 0.28 | 0.65 |
| 0.35 | 0.85 |
| 0.34 | 0.82 |
| 0.24 | 0.54 |
| 0.28 | 0.65 |
| 0.28 | 0.64 |
| 0.27 | 0.61 |
| 0.26 | 0.58 |
| 0.25 | 0.56 |
| 0.25 | 0.55 |
| 0.25 | 0.54 |
| 0.26 | 0.59 |
| 0.22 | 0.46 |
| 0.23 | 0.50 |
| 0.23 | 0.50 |

DEoS DATABASE

| Number of Explosives | Number of data |     | residuals D |          |      |            | residuals P |       |       |       | Gamma (γ) correlation (CHNO explosives) |      | Jones and Grüneisen parameters (DEoS Model) |  |
|----------------------|----------------|-----|-------------|----------|------|------------|-------------|-------|-------|-------|-----------------------------------------|------|---------------------------------------------|--|
|                      | D              | P   | Statistics  |          | RMRS | Statistics |             | RMRS  | r     | 0.44  | 0.53                                    | α    | Γ                                           |  |
|                      |                |     | velocity    | pressure |      | velocity   | pressure    |       |       |       |                                         |      |                                             |  |
| KJ (only CHNO)       | 449            | 224 | KJ          | DEoS     | 3.4% | 1.7%       | KJ          | DEoS  | 7.0%  | 6.0%  | average values                          | 0.27 | 0.60                                        |  |
| DEoS                 | 519            | 263 | MAPR        | P97.5    | 2.5% | 1.3%       | MAPR        | P97.5 | 5.6%  | 4.9%  | standard deviation                      | 0.02 | 0.06                                        |  |
|                      |                |     |             |          | 8.2% | 3.9%       |             |       | 17.0% | 12.6% |                                         |      |                                             |  |

| Acr                         | experimental data |            |             | reference | calculated D          |                         |                   |                     | calculated P           |                   |                   |                     | Y <sub>experimental</sub> | Y <sub>KJ</sub> | Y <sub>DEoS</sub> | α    | Γ    |
|-----------------------------|-------------------|------------|-------------|-----------|-----------------------|-------------------------|-------------------|---------------------|------------------------|-------------------|-------------------|---------------------|---------------------------|-----------------|-------------------|------|------|
|                             | density (g/cc)    | Dexp (m/s) | Pexp (kbar) |           | D <sub>KJ</sub> (m/s) | D <sub>DEoS</sub> (m/s) | RRD <sub>KJ</sub> | RRD <sub>DEoS</sub> | P <sub>KJ</sub> (kbar) | P <sub>DEoS</sub> | RRP <sub>KJ</sub> | RRP <sub>DEoS</sub> |                           |                 |                   |      |      |
| hmxx                        | 1.40              | 7300       | 210         | [8]       | 7410                  | 7328                    | 1.5%              | 0.4%                | 207                    | 201               | -1.6%             | -4.2%               | 2.55                      | 2.72            | 2.74              | 0.25 | 0.54 |
| hmxx                        | 1.60              | 7910       | 280         | [8]       | 8093                  | 8024                    | 2.3%              | 1.4%                | 270                    | 269               | -3.6%             | -3.8%               | 2.58                      | 2.88            | 2.82              | 0.26 | 0.58 |
| hmxx                        | 1.72              | 8480       | nan         | [29]      | 8503                  | 8441                    | 0.3%              | -0.5%               | 312                    | 316               |                   |                     |                           |                 |                   | 0.27 | 0.60 |
| hmxx                        | 1.77              | 8500       | 323         | [38]      | 8674                  | 8615                    | 2.0%              | 1.4%                | 330                    | 338               | 2.3%              | 4.5%                | 2.96                      | 3.03            | 2.89              | 0.27 | 0.61 |
| hmxx                        | 1.80              | NaN        | 361         | [2]       | 8776                  | 8719                    |                   |                     | 342                    | 351               | -5.4%             | -2.9%               |                           |                 |                   | 0.27 | 0.62 |
| hmxx                        | 1.81              | 8780       | nan         | [29]      | 8817                  | 8761                    | 0.4%              | -0.2%               | 346                    | 356               |                   |                     |                           |                 |                   | 0.27 | 0.62 |
| hmxx                        | 1.88              | 9050       | nan         | [50]      | 9032                  | 8980                    | -0.2%             | -0.8%               | 371                    | 385               |                   |                     |                           |                 |                   | 0.28 | 0.63 |
| hmxx                        | 1.89              | 9100       | 405         | [8]       | 9083                  | 9032                    | -0.2%             | -0.7%               | 377                    | 392               | -7.0%             | -3.2%               | 2.86                      | 3.14            | 2.93              | 0.28 | 0.64 |
| hmxx                        | 1.89              | 9110       | 390         | [8]       | 9083                  | 9032                    | -0.3%             | -0.9%               | 377                    | 392               | -3.4%             | 0.5%                | 3.02                      | 3.14            | 2.93              | 0.28 | 0.64 |
| hmxx                        | 1.90              | 9110       | 393         | [31]      | 9118                  | 9067                    | 0.1%              | -0.5%               | 381                    | 397               | -3.1%             | 0.9%                | 3.01                      | 3.15            | 2.94              | 0.28 | 0.64 |
| hmxx                        | 1.90              | 9150       | nan         | [48]      | 9118                  | 9067                    | -0.4%             | -0.9%               | 381                    | 397               |                   |                     |                           |                 |                   | 0.28 | 0.64 |
| HMXX/EXON (91/9)            | 1.83              | 8665       | 343         | [14]      |                       | 8545                    |                   | -1.4%               | 337                    |                   |                   | -1.6%               |                           |                 |                   | 0.28 | 0.66 |
| HMXX/GAP (84/16)            | 1.64              | 8384       | nan         | [4]       | 8120                  | 8083                    | -3.1%             | -3.6%               | 276                    | 280               |                   |                     |                           |                 |                   | 0.26 | 0.58 |
| HMXX/HH (75/25)             | 1.86              | 9100       | nan         | [14]      | 9096                  | 9126                    | 0.0%              | 0.3%                | 374                    | 391               |                   |                     |                           |                 |                   | 0.28 | 0.65 |
| HMXX/PIB (91/9)             | 1.67              | 8318       | nan         | [44]      | 8004                  | 8037                    | -3.8%             | -3.4%               | 271                    | 278               |                   |                     |                           |                 |                   | 0.27 | 0.61 |
| HMXX/SYLGARD (85/15)        | 1.59              | 7936       | nan         | [3]       |                       | 7633                    |                   | -3.8%               | 237                    |                   |                   |                     |                           |                 |                   | 0.27 | 0.63 |
| HMXX/TATB/VIITON (10/80/10) | 1.84              | 7400       | 245         | [5]       |                       | 7554                    |                   | 2.1%                | 255                    |                   |                   | 4.2%                |                           |                 |                   | 0.31 | 0.74 |
| HMXX/TATB/VIITON (20/70/10) | 1.84              | 7410       | 253         | [5]       |                       | 7671                    |                   | 3.5%                | 265                    |                   |                   | 4.6%                |                           |                 |                   | 0.31 | 0.73 |
| HMXX/TATB/VIITON (30/60/10) | 1.82              | 7640       | 260         | [5]       |                       | 7722                    |                   | 1.1%                | 267                    |                   |                   | 2.6%                |                           |                 |                   | 0.30 | 0.72 |
| HMXX/TATB/VIITON (40/50/10) | 1.83              | 7730       | 278         | [5]       |                       | 7868                    |                   | 1.8%                | 279                    |                   |                   | 0.5%                |                           |                 |                   | 0.30 | 0.71 |
| HMXX/TATB/VIITON (50/40/10) | 1.83              | 7910       | 290         | [5]       |                       | 7979                    |                   | 0.9%                | 288                    |                   |                   | -0.6%               |                           |                 |                   | 0.30 | 0.70 |
| HMXX/TATB/VIITON (60/30/10) | 1.83              | 8120       | 300         | [5]       |                       | 8089                    |                   | -0.4%               | 297                    |                   |                   | -0.9%               |                           |                 |                   | 0.30 | 0.69 |
| HMXX/TATB/VIITON (70/20/10) | 1.83              | 8190       | 304         | [5]       |                       | 8198                    |                   | 0.1%                | 306                    |                   |                   | 0.7%                |                           |                 |                   | 0.29 | 0.68 |
| HMXX/TATB/VIITON (80/10/10) | 1.84              | 8240       | 312         | [5]       |                       | 8339                    |                   | 1.2%                | 319                    |                   |                   | 2.3%                |                           |                 |                   | 0.29 | 0.68 |
| HMXX/TNT (60/40)            | 1.60              | 7360       | 216         | [38]      | 7605                  | 7544                    | 3.3%              | 2.5%                | 238                    | 239               | 10.4%             | 10.4%               | 3.01                      | 2.88            | 2.82              | 0.26 | 0.58 |
| HMXX/TNT (60/40)            | 1.63              | 7550       | 226         | [38]      | 7701                  | 7642                    | 2.0%              | 1.2%                | 247                    | 249               | 9.5%              | 10.0%               | 3.11                      | 2.91            | 2.83              | 0.26 | 0.58 |
| HMXX/TNT (60/40)            | 1.67              | 7590       | 241         | [38]      | 7829                  | 7772                    | 3.2%              | 2.4%                | 260                    | 262               | 7.7%              | 8.9%                | 2.99                      | 2.94            | 2.85              | 0.26 | 0.59 |
| HMXX/TNT (60/40)            | 1.70              | 7680       | 253         | [38]      | 7926                  | 7870                    | 3.2%              | 2.5%                | 269                    | 273               | 6.4%              | 7.9%                | 2.96                      | 2.97            | 2.86              | 0.26 | 0.60 |
| HMXX/TNT (60/40)            | 1.75              | 8000       | nan         | [52]      | 8086                  | 8033                    | 1.1%              | 0.4%                | 285                    | 291               |                   |                     |                           |                 |                   | 0.27 | 0.61 |
| HMXX/TNT (60/40)            | 1.80              | 8160       | 320         | [8]       | 8247                  | 8196                    | 1.1%              | 0.4%                | 302                    | 310               | -5.7%             | -3.0%               | 2.75                      | 3.06            | 2.89              | 0.27 | 0.62 |
| HMXX/TNT (70/30)            | 1.60              | 7520       | 227         | [38]      | 7728                  | 7665                    | 2.8%              | 1.9%                | 246                    | 246               | 8.4%              | 8.4%                | 2.99                      | 2.88            | 2.82              | 0.26 | 0.58 |
| HMXX/TNT (70/30)            | 1.64              | 7680       | 243         | [38]      | 7858                  | 7797                    | 2.3%              | 1.5%                | 259                    | 260               | 6.4%              | 7.0%                | 2.98                      | 2.92            | 2.83              | 0.26 | 0.59 |
| HMXX/TNT (70/30)            | 1.68              | 7810       | 257         | [38]      | 7989                  | 7930                    | 2.3%              | 1.5%                | 271                    | 274               | 5.6%              | 6.7%                | 2.99                      | 2.95            | 2.85              | 0.26 | 0.59 |
| HMXX/TNT (70/30)            | 1.70              | 7900       | 267         | [38]      | 8054                  | 7996                    | 2.0%              | 1.2%                | 278                    | 282               | 4.1%              | 5.5%                | 2.97                      | 2.97            | 2.86              | 0.26 | 0.60 |
| HMXX/TNT (70/30)            | 1.77              | 8192       | 295         | [45]      | 8283                  | 8228                    | 1.1%              | 0.4%                | 301                    | 308               | 2.1%              | 4.6%                | 3.03                      | 3.03            | 2.89              | 0.27 | 0.61 |
| HMXX/TNT (75/25)            | 1.82              | 8550       | 306.5       | [34]      | 8516                  | 8463                    | -0.4%             | -1.0%               | 324                    | 334               | 5.7%              | 9.0%                | 3.34                      | 3.08            | 2.90              | 0.27 | 0.62 |
| HMXX/TNT (75/25)            | 1.81              | 8480       | nan         | [8]       | 8480                  | 8426                    | 0.0%              | -0.6%               | 320                    | 329               |                   |                     |                           |                 |                   | 0.27 | 0.62 |
| HMXX/TNT (78/22)            | 1.82              | NaN        | 342         | [8]       | 8553                  | 8499                    |                   |                     | 327                    | 337               | -4.5%             | -1.6%               |                           |                 |                   | 0.27 | 0.62 |
| HMXX/TNT (80/20)            | 1.61              | 7730       | 242         | [38]      | 7884                  | 7818                    | 2.0%              | 1.1%                | 257                    | 257               | 6.3%              | 6.3%                | 2.98                      | 2.89            | 2.82              | 0.26 | 0.58 |
| HMXX/TNT (80/20)            | 1.64              | 7820       | 251         | [38]      | 7983                  | 7919                    | 2.1%              | 1.3%                | 267                    | 268               | 6.3%              | 6.8%                | 3.00                      | 2.92            | 2.84              | 0.26 | 0.59 |
| HMXX/TNT (80/20)            | 1.68              | 7950       | 265         | [38]      | 8116                  | 8054                    | 2.1%              | 1.3%                | 280                    | 283               | 5.7%              | 6.7%                | 3.01                      | 2.95            | 2.85              | 0.26 | 0.59 |
| HMXX/TNT (80/20)            | 1.71              | 8050       | 278         | [38]      | 8215                  | 8155                    | 2.0%              | 1.3%                | 290                    | 294               | 4.4%              | 5.9%                | 2.99                      | 2.98            | 2.86              | 0.26 | 0.60 |
| HMXX/TNT (80/20)            | 1.82              | 8523       | 331         | [45]      | 8579                  | 8526                    | 0.7%              | 0.0%                | 329                    | 339               | -0.7%             | 2.3%                | 2.99                      | 3.08            | 2.91              | 0.27 | 0.62 |
| HMXX/TNT (89/11)            | 1.84              | 8778       | 352         | [45]      | 8766                  | 8713                    | -0.1%             | -0.7%               | 345                    | 357               | -1.9%             | 1.4%                | 3.03                      | 3.09            | 2.91              | 0.27 | 0.63 |
| HMXX/TNT (90/10)            | 1.60              | 7850       | 247         | [38]      | 7972                  | 7904                    | 1.6%              | 0.7%                | 262                    | 262               | 6.0%              | 5.9%                | 2.99                      | 2.88            | 2.82              | 0.26 | 0.58 |
| HMXX/TNT (90/10)            | 1.65              | 8000       | 266         | [38]      | 8140                  | 8076                    | 1.8%              | 0.9%                | 279                    | 280               | 4.7%              | 5.3%                | 2.97                      | 2.92            | 2.84              | 0.26 | 0.59 |
| HMXX/TNT (90/10)            | 1.71              | 8200       | 288         | [38]      | 8342                  | 8281                    | 1.7%              | 1.0%                | 299                    | 303               | 3.9%              | 5.3%                | 2.99                      | 2.98            | 2.87              | 0.27 | 0.60 |
| HMXX/TNT (90/10)            | 1.75              | 8320       | 303         | [38]      | 8477                  | 8418                    | 1.9%              | 1.2%                | 313                    | 319               | 3.4%              | 5.4%                | 3.00                      | 3.01            | 2.88              | 0.27 | 0.61 |
| hn                          | 1.63              | 8691       | nan         | [14]      | 7920                  | 8354                    | -8.9%             | -3.9%               | 261                    | 279               |                   |                     |                           |                 |                   | 0.30 | 0.71 |
| hnab                        | 1.60              | 7310       | 205         | [8]       | 7196                  | 7091                    | -1.6%             | -3.0%               | 213                    | 215               | 4.1%              | 4.7%                | 3.17                      | 2.88            | 2.75              | 0.25 | 0.54 |
| hnb                         | 1.97              | 9340       | 430         | [8]       | 9338                  | 9250                    | 0.0%              | -1.0%               | 408                    | 437               | -5.2%             | 1.7%                | 3.00                      | 3.21            | 2.85              | 0.26 | 0.59 |
| hnb                         | 1.97              | 9300       | 420         | [55]      | 9348                  | 9260                    | 0.5%              | -0.4%               | 409                    | 439               | -2.7%             | 4.5%                | 3.06                      | 3.22            | 2.86              | 0.26 | 0.60 |
| hnb                         | 1.97              | 9335       | 400         | [34]      | 9348                  | 9260                    | 0.1%              | -0.8%               | 409                    | 439               | 2.2%              | 9.7%                | 3.00                      | 3.22            | 2.86              | 0.26 | 0.60 |
| hnb                         | 2.00              | 9500       | nan         | [46]      | 9440                  | 9349                    | -0.6%             | -1.6%               | 420                    | 452               |                   |                     |                           |                 |                   | 0.26 | 0.60 |
| hnbp                        | 1.60              | 7100       | nan         | [48]      | 7075                  | 6945                    | -0.4%             | -2.2%               | 206                    | 206               |                   |                     |                           |                 |                   | 0.25 | 0.54 |
| hnetn                       | 1.86              | 7580       | nan         | [46]      | 7373                  | 7496                    | -2.7%             | -1.1%               | 246                    | 256               |                   |                     |                           |                 |                   | 0.31 | 0.73 |
| hns                         | 1.00              | 5100       | 73          | [8]       | 5131                  | 5082                    | 0.6%              | -0.3%               | 76                     | 75                | 4.1%              | 2.2%                | 2.56                      | 2.46            | 2.46              | 0.22 | 0.44 |
| hns                         | 1.20              | 5740       | 115         | [8]       | 5711                  | 5653                    | -0.5%             | -1.5%               | 109                    | 107               | -4.8%             | -6.7%               | 2.44                      | 2.58            | 2.58              | 0.23 | 0.48 |
| hns                         | 1.40              | 6340       | 160         | [8]       | 6291                  | 6224                    | -0.8%             | -1.8%               | 149                    | 148               | -6.9%             | -7.7%               | 2.52                      | 2.72            | 2.67              | 0.24 | 0.51 |
| hns                         | 1.60              | 6800       | nan         | [8]       | 6871                  | 6795                    | 1.0%              | -0.1%               | 195                    | 196               |                   |                     |                           |                 |                   | 0.25 | 0.55 |
| hns                         | 1.66              | 7030       | 215         | [8]       | 7045                  | 6967                    | 0.2%              | -0.9%               | 209                    | 213               | -2.6%             | -1.0%               | 2.82                      | 2.93            | 2.78              | 0.25 | 0.56 |
| hns                         | 1.70              | 7000       | 210         | [38]      | 7161                  | 7081                    | 2.3%              | 1.2%                | 220                    | 224               | 4.6%              | 6.8%                | 2.97                      | 2.97            | 2.80              | 0.25 | 0.57 |
| hns                         | 1.70              | 7000       | nan         | [8]       | 7161                  | 7081                    | 2.3%              | 1.2%                | 220                    | 224               |                   |                     |                           |                 |                   | 0.25 | 0.57 |
| hns                         | 1.74              | 7130       | nan         | [48]      | 7277                  | 7195                    | 2.1%              | 0.9%                | 230                    | 236               |                   |                     |                           |                 |                   | 0.26 | 0.58 |
| HZ/HH (21/79)               | 1.44              | 8600       | nan         | [14]      | 7888                  | 8425                    | -8.3%             | -2.0%               | 239                    | 255               |                   |                     |                           |                 |                   | 0.29 | 0.68 |
| HZ/HH (70/30)               | 1.14              | 8025       | nan         | [14]      | 6625                  | 7904                    | -17.4%            | -1.5%               | 141                    | 170               |                   |                     |                           |                 |                   | 0.33 | 0.79 |
| IMX-104                     | 1.72              | 7705       | nan         | [36]      | 7414                  | 7578                    | -3.8%             | -1.6%               | 237                    | 250               |                   |                     |                           |                 |                   | 0.28 | 0.65 |
| IMX-104                     | 1.76              | 7714       | nan         | [43]      | 7512                  | 7685                    | -2.6%             | -0.4%               | 247                    | 261               |                   |                     |                           |                 |                   | 0.28 | 0.66 |
| ign                         | 1.04              | 5400       | nan         | [48]      | 5474                  | 5429                    | 1.4%              | 0.5%                | 89                     | 83                |                   |                     |                           |                 |                   | 0.24 | 0.52 |

DEoS DATABASE

Number of Explosives 238

|                | Number of data |     |
|----------------|----------------|-----|
|                | D              | P   |
| KJ (only CHNO) | 449            | 224 |
| DEoS           | 519            | 263 |

| residuals D |          |
|-------------|----------|
| Statistics  | velocity |
| RMRS        | 3.4%     |
| MAPR        | 2.5%     |
| P97.5       | 8.2%     |

| residuals P |          |
|-------------|----------|
| Statistics  | pressure |
| RMRS        | 7.0%     |
| MAPR        | 5.6%     |
| P97.5       | 17.0%    |

Gamma (γ) correlation (CHNO explosives)

| KJ | DEoS |
|----|------|
| r  | 0.44 |

Jones and Grüneisen parameters (DEoS Model)

| average values     | α    | Γ    |
|--------------------|------|------|
|                    | 0.27 | 0.60 |
| standard deviation | 0.02 | 0.06 |

| Acr                  | experimental data |            |             | reference | calculated D          |                         |                   |                     | calculated P           |                          |                   |                     | Y <sub>experimental</sub> | Y <sub>KJ</sub> | Y <sub>DEoS</sub> |
|----------------------|-------------------|------------|-------------|-----------|-----------------------|-------------------------|-------------------|---------------------|------------------------|--------------------------|-------------------|---------------------|---------------------------|-----------------|-------------------|
|                      | density (g/cc)    | Dexp (m/s) | Pexp (kbar) |           | D <sub>KJ</sub> (m/s) | D <sub>DEoS</sub> (m/s) | RRD <sub>KJ</sub> | RRD <sub>DEoS</sub> | P <sub>KJ</sub> (kbar) | P <sub>DEoS</sub> (kbar) | RRP <sub>KJ</sub> | RRP <sub>DEoS</sub> |                           |                 |                   |
| LLM-105/VITON (95/5) | 1.78              | 7980       | nan         | [35]      |                       | 7880                    |                   |                     | 285                    |                          |                   |                     |                           |                 |                   |
| LLM-175/VITON (95/5) | 1.65              | 7730       | nan         | [35]      |                       | 7472                    |                   |                     | 241                    |                          |                   |                     |                           |                 |                   |
| LX-01                | 1.24              | 6840       | nan         | [8]       | 6952                  | 6739                    | 1.6%              |                     | 166                    | 155                      |                   |                     |                           |                 |                   |
| LX-01                | 1.31              | NaN        | 156         | [10]      | 7195                  | 6979                    |                   |                     | 186                    | 174                      | 19.0%             | 11.3%               |                           |                 |                   |
| LX-04                | 1.86              | 8460       | 350         | [8]       |                       | 8281                    |                   |                     | 314                    | 314                      |                   | -10.2%              |                           |                 |                   |
| LX-04                | 1.87              | 8480       | 320         | [13]      |                       | 8308                    |                   |                     | 317                    | 317                      |                   | -0.8%               |                           |                 |                   |
| LX-04                | 1.87              | 8480       | 345         | [34]      |                       | 8305                    |                   |                     | 317                    | 317                      |                   | -8.1%               |                           |                 |                   |
| LX-04                | 1.87              | 8540       | nan         | [10]      |                       | 8315                    |                   |                     | 318                    | 318                      |                   |                     |                           |                 |                   |
| LX-07                | 1.85              | 8590       | 377.3       | [34]      |                       | 8479                    |                   |                     | 332                    | 332                      |                   | -11.9%              |                           |                 |                   |
| LX-07                | 1.87              | 8640       | nan         | [8]       |                       | 8547                    |                   |                     | 341                    | 341                      |                   |                     |                           |                 |                   |
| LX-09                | 1.86              | 8820       | 366.3       | [34]      |                       | 8855                    |                   |                     | 371                    | 371                      |                   | 1.4%                |                           |                 |                   |
| LX-09                | 1.84              | 8810       | 377         | [8]       |                       | 8783                    |                   |                     | 362                    | 362                      |                   | -4.0%               |                           |                 |                   |
| LX-10                | 1.84              | 8810       | 372         | [34]      |                       | 8662                    |                   |                     | 349                    | 349                      |                   | -6.1%               |                           |                 |                   |
| LX-10                | 1.86              | 8820       | 375         | [8]       |                       | 8728                    |                   |                     | 358                    | 358                      |                   | -4.6%               |                           |                 |                   |
| LX-10                | 1.87              | 8850       | 375         | [10]      |                       | 8762                    |                   |                     | 362                    | 362                      |                   | -3.4%               |                           |                 |                   |
| LX-11                | 1.86              | 8320       | nan         | [8]       |                       | 8027                    |                   |                     | 291                    | 291                      |                   |                     |                           |                 |                   |
| LX-14                | 1.81              | 8760       | nan         | [14]      | 8643                  | 8629                    | -1.3%             |                     | 332                    | 344                      |                   |                     |                           |                 |                   |
| LX-14                | 1.83              | 8800       | 370         | [8]       | 8710                  | 8698                    | -1.0%             |                     | 340                    | 353                      | -8.2%             | -4.7%               | 2.83                      | 3.09            | 2.93              |
| LX-14                | 1.84              | 8830       | 370         | [8]       | 8743                  | 8733                    | -1.0%             |                     | 344                    | 357                      | -7.1%             | -3.5%               | 2.88                      | 3.09            | 2.93              |
| LX-14                | 1.87              | 8840       | nan         | [9]       | 8844                  | 8836                    | 0.0%              |                     | 355                    | 371                      |                   |                     |                           |                 |                   |
| LX-15                | 1.58              | 6840       | nan         | [8]       |                       | 6591                    |                   |                     | 181                    | 181                      |                   |                     |                           |                 |                   |
| LX-17                | 1.91              | 7630       | 260         | [8]       |                       | 7807                    |                   |                     | 283                    | 283                      |                   | 8.9%                |                           |                 |                   |
| manitrol             | 1.75              | 8260       | nan         | [48]      | 8522                  | 8068                    | 3.2%              |                     | 317                    | 298                      |                   |                     |                           |                 |                   |
| md                   | 1.73              | 9000       | nan         | [48]      | 8849                  | 8804                    | -1.7%             |                     | 339                    | 344                      |                   |                     |                           |                 |                   |
| MEN-II               | 1.02              | 5490       | nan         | [8]       | 5626                  | 5590                    | 2.5%              |                     | 93                     | 86                       |                   |                     |                           |                 |                   |
| metn                 | 1.46              | 7180       | nan         | [48]      | 7378                  | 7145                    | 2.8%              |                     | 211                    | 199                      |                   |                     |                           |                 |                   |
| nag                  | 1.65              | 8600       | nan         | [48]      | 7904                  | 8505                    | -8.1%             |                     | 263                    | 293                      |                   |                     |                           |                 |                   |
| ng                   | 1.59              | 7650       | 253         | [10]      | 8133                  | 7726                    | 6.3%              |                     | 272                    | 252                      | 7.3%              | -0.3%               | 2.68                      | 2.87            | 2.76              |
| ng                   | 1.59              | 7580       | nan         | [14]      | 8133                  | 7726                    | 7.3%              |                     | 272                    | 252                      |                   |                     |                           |                 |                   |
| ng                   | 1.60              | 7700       | 253         | [8]       | 8168                  | 7759                    | 6.1%              |                     | 275                    | 256                      | 8.7%              | 1.1%                | 2.75                      | 2.88            | 2.77              |
| ng                   | 1.60              | 7740       | nan         | [48]      | 8168                  | 7759                    | 5.5%              |                     | 275                    | 256                      |                   |                     |                           |                 |                   |
| nm                   | 1.13              | 6250       | 128         | [31]      | 6372                  | 6238                    | 2.0%              |                     | 130                    | 121                      | 1.3%              | -5.8%               | 2.44                      | 2.53            | 2.64              |
| nm                   | 1.13              | 6250       | 133         | [31]      | 6372                  | 6238                    | 2.0%              |                     | 130                    | 121                      | -2.5%             | -9.4%               | 2.31                      | 2.53            | 2.64              |
| nm                   | 1.13              | 6370       | 125         | [34]      | 6379                  | 6245                    | 0.1%              |                     | 130                    | 121                      | 4.1%              | -3.2%               | 2.67                      | 2.53            | 2.64              |
| nm                   | 1.13              | 6280       | 120         | [8]       | 6379                  | 6245                    | 1.6%              |                     | 130                    | 121                      | 8.5%              | 0.8%                | 2.71                      | 2.53            | 2.64              |
| nm                   | 1.13              | 6350       | 125         | [8]       | 6379                  | 6245                    | 0.5%              |                     | 130                    | 121                      | 4.1%              | -3.2%               | 2.65                      | 2.53            | 2.64              |
| nm                   | 1.13              | 6299       | 134         | [34]      | 6389                  | 6256                    | 1.4%              |                     | 131                    | 122                      | -2.3%             | -9.2%               | 2.35                      | 2.53            | 2.64              |
| nm                   | 1.14              | 6370       | nan         | [48]      | 6413                  | 6280                    | 0.7%              |                     | 132                    | 123                      |                   |                     |                           |                 |                   |
| nm                   | 1.21              | 6750       | nan         | [48]      | 7031                  | 6728                    | 4.2%              |                     | 167                    | 152                      |                   |                     |                           |                 |                   |
| no                   | 1.30              | 5620       | 103         | [14]      | 5785                  | 5613                    | 2.9%              |                     | 119                    | 106                      | 15.9%             | 2.6%                | 2.99                      | 2.64            | 2.88              |
| nona                 | 1.70              | 7400       | nan         | [8]       | 7359                  | 7217                    | -0.6%             |                     | 232                    | 234                      |                   |                     |                           |                 |                   |
| nona                 | 1.78              | 7560       | nan         | [48]      | 7597                  | 7448                    | 0.5%              |                     | 254                    | 259                      |                   |                     |                           |                 |                   |
| nq                   | 1.00              | 5460       | nan         | [33]      | 5448                  | 5612                    | -0.2%             |                     | 86                     | 84                       |                   |                     |                           |                 |                   |
| nq                   | 1.40              | NaN        | 158         | [18]      | 6680                  | 7119                    |                   |                     | 168                    | 178                      | 6.3%              | 12.9%               |                           |                 |                   |
| nq                   | 1.51              | 7540       | nan         | [15]      | 7031                  | 7549                    | -6.8%             |                     | 196                    | 214                      |                   |                     |                           |                 |                   |
| nq                   | 1.55              | 7650       | nan         | [8]       | 7142                  | 7684                    | -6.6%             |                     | 206                    | 226                      |                   |                     |                           |                 |                   |
| nq                   | 1.62              | 7930       | nan         | [8]       | 7357                  | 7948                    | -7.2%             |                     | 225                    | 251                      |                   |                     |                           |                 |                   |
| nq                   | 1.63              | 7980       | nan         | [15]      | 7385                  | 7982                    | -7.5%             |                     | 227                    | 254                      |                   |                     |                           |                 |                   |
| nq                   | 1.63              | NaN        | 256         | [29]      | 7385                  | 7982                    |                   |                     | 227                    | 254                      | -11.2%            | -0.7%               |                           |                 |                   |
| nq                   | 1.64              | 7940       | nan         | [29]      | 7403                  | 8004                    | -6.8%             |                     | 229                    | 257                      |                   |                     |                           |                 |                   |
| nq                   | 1.65              | 7980       | nan         | [29]      | 7453                  | 8065                    | -6.6%             |                     | 234                    | 263                      |                   |                     |                           |                 |                   |
| nq                   | 1.70              | 8200       | nan         | [48]      | 7604                  | 8249                    | -7.3%             |                     | 248                    | 281                      |                   |                     |                           |                 |                   |
| nq                   | 1.72              | NaN        | 245         | [8]       | 7665                  | 8325                    |                   |                     | 254                    | 289                      | 3.5%              | 18.1%               |                           |                 |                   |
| nq                   | 1.78              | 8590       | nan         | [8]       | 7850                  | 8551                    | -8.6%             |                     | 272                    | 314                      |                   |                     |                           |                 |                   |
| NQ/ESTANE (95/5)     | 1.70              | 8280       | 268         | [14]      | 7460                  | 8128                    | -9.9%             |                     | 238                    | 272                      | -11.0%            | 1.4%                | 3.35                      | 2.97            | 3.13              |
| NQ/TNT(35/65)        | 1.66              | NaN        | 212         | [18]      | 7243                  | 7373                    |                   |                     | 221                    | 230                      | 4.4%              | 8.4%                |                           |                 |                   |
| NQ/TNT(50/50)        | 1.67              | NaN        | 221         | [18]      | 7340                  | 7564                    |                   |                     | 228                    | 240                      | 3.1%              | 8.7%                |                           |                 |                   |
| NQ/TNT(50/50)        | 1.66              | 7400       | nan         | [18]      | 7334                  | 7557                    | -0.9%             |                     | 227                    | 240                      |                   |                     |                           |                 |                   |
| NQ/TNT(50/50)        | 1.64              | 7280       | nan         | [18]      | 7274                  | 7490                    | -0.1%             |                     | 222                    | 233                      |                   |                     |                           |                 |                   |
| NQ/TNT(50/50)        | 1.64              | 7620       | nan         | [18]      | 7259                  | 7474                    | -4.7%             |                     | 220                    | 231                      |                   |                     |                           |                 |                   |
| NQ/TNT(50/50)        | 1.64              | 7430       | nan         | [18]      | 7253                  | 7467                    | -2.4%             |                     | 220                    | 231                      |                   |                     |                           |                 |                   |
| NQ/TNT(80/20)        | 1.69              | 7833       | nan         | [18]      | 7528                  | 7987                    | -3.9%             |                     | 242                    | 266                      |                   |                     |                           |                 |                   |
| NQ/TNT(90/10)        | 1.70              | 8022       | nan         | [18]      | 7585                  | 8136                    | -5.5%             |                     | 246                    | 276                      |                   |                     |                           |                 |                   |
| NQ/TNT(95/5)         | 1.69              | 8056       | nan         | [18]      | 7564                  | 8156                    | -6.1%             |                     | 244                    | 275                      |                   |                     |                           |                 |                   |
| nto                  | 1.00              | 5269       | nan         | [33]      | 5275                  | 5321                    | 0.1%              |                     | 80                     | 77                       |                   |                     |                           |                 |                   |
| nto                  | 1.80              | 8020       | nan         | [35]      | 7660                  | 8028                    | -4.5%             |                     | 260                    | 287                      |                   |                     |                           |                 |                   |
| nto                  | 1.83              | 8090       | nan         | [35]      | 7749                  | 8129                    | -4.2%             |                     | 269                    | 298                      |                   |                     |                           |                 |                   |
| nto                  | 1.86              | 8200       | nan         | [35]      | 7839                  | 8231                    | -4.4%             |                     | 278                    | 310                      |                   |                     |                           |                 |                   |
| nto                  | 1.87              | 8180       | nan         | [35]      | 7868                  | 8264                    | -3.8%             |                     | 281                    | 314                      |                   |                     |                           |                 |                   |

| α    | Γ    |
|------|------|
| 0.27 | 0.60 |
| 0.26 | 0.58 |
| 0.23 | 0.50 |
| 0.24 | 0.51 |
| 0.30 | 0.71 |
| 0.30 | 0.71 |
| 0.30 | 0.71 |
| 0.30 | 0.71 |
| 0.29 | 0.68 |
| 0.29 | 0.68 |
| 0.28 | 0.63 |
| 0.27 | 0.63 |
| 0.28 | 0.65 |
| 0.28 | 0.65 |
| 0.28 | 0.65 |
| 0.32 | 0.75 |
| 0.27 | 0.63 |
| 0.28 | 0.63 |
| 0.28 | 0.63 |
| 0.28 | 0.64 |
| 0.25 | 0.56 |
| 0.31 | 0.74 |
| 0.26 | 0.58 |
| 0.27 | 0.62 |
| 0.24 | 0.54 |
| 0.25 | 0.54 |
| 0.30 | 0.71 |
| 0.25 | 0.55 |
| 0.25 | 0.55 |
| 0.25 | 0.55 |
| 0.25 | 0.55 |
| 0.23 | 0.50 |
| 0.23 | 0.50 |
| 0.23 | 0.50 |
| 0.23 | 0.50 |
| 0.23 | 0.50 |
| 0.23 | 0.50 |
| 0.23 | 0.50 |
| 0.23 | 0.50 |
| 0.23 | 0.50 |
| 0.27 | 0.61 |
| 0.25 | 0.56 |
| 0.26 | 0.57 |
| 0.25 | 0.55 |
| 0.29 | 0.66 |
| 0.30 | 0.69 |
| 0.30 | 0.70 |
| 0.31 | 0.72 |
| 0.31 | 0.72 |
| 0.31 | 0.72 |
| 0.31 | 0.73 |
| 0.31 | 0.73 |
| 0.31 | 0.74 |
| 0.32 | 0.75 |
| 0.32 | 0.76 |
| 0.32 | 0.76 |
| 0.28 | 0.63 |
| 0.28 | 0.65 |
| 0.28 | 0.65 |
| 0.28 | 0.65 |
| 0.28 | 0.65 |
| 0.30 | 0.71 |
| 0.31 | 0.73 |
| 0.31 | 0.73 |
| 0.30 | 0.71 |
| 0.30 | 0.71 |
| 0.30 | 0.71 |
| 0.30 | 0.71 |



DEoS DATABASE

Number of Explosives 238

|                | Number of data |     |
|----------------|----------------|-----|
|                | D              | P   |
| KJ (only CHNO) | 449            | 224 |
| DEoS           | 519            | 263 |

| residuals D |          |
|-------------|----------|
| Statistics  | velocity |
| RMRS        | 3.4%     |
| MAPR        | 2.5%     |
| P97.5       | 8.2%     |

| residuals P |          |
|-------------|----------|
| Statistics  | pressure |
| RMRS        | 7.0%     |
| MAPR        | 5.6%     |
| P97.5       | 17.0%    |

Gamma (γ) correlation (CHNO explosives)

|   | KJ   | DEoS |
|---|------|------|
| r | 0.44 | 0.53 |

Jones and Grüneisen parameters (DEoS Model)

|                    | α    | Γ    |
|--------------------|------|------|
| average values     | 0.27 | 0.60 |
| standard deviation | 0.02 | 0.06 |

| Acr                         | experimental data |            |             | reference | calculated D          |                         |                   |                     | calculated P           |                          |                   |                     | Y <sub>experimental</sub> | Y <sub>KJ</sub> | Y <sub>DEoS</sub> | α    | Γ    |
|-----------------------------|-------------------|------------|-------------|-----------|-----------------------|-------------------------|-------------------|---------------------|------------------------|--------------------------|-------------------|---------------------|---------------------------|-----------------|-------------------|------|------|
|                             | density (g/cc)    | Dexp (m/s) | Pexp (kbar) |           | D <sub>KJ</sub> (m/s) | D <sub>DEoS</sub> (m/s) | RRD <sub>KJ</sub> | RRD <sub>DEoS</sub> | P <sub>KJ</sub> (kbar) | P <sub>DEoS</sub> (kbar) | RRP <sub>KJ</sub> | RRP <sub>DEoS</sub> |                           |                 |                   |      |      |
| nto                         | 1.87              | 8220       | nan         | [35]      | 7868                  | 8264                    | -4.3%             | 0.5%                | 281                    | 314                      |                   |                     |                           |                 |                   | 0.30 | 0.72 |
| NTO/RDX/TNT (50/12/38)      | 1.79              | 7660       | 265         | [22]      | 7722                  | 7852                    | 0.8%              | 2.5%                | 264                    | 279                      | -0.5%             | 5.3%                | 2.97                      | 3.05            | 2.96              | 0.28 | 0.65 |
| NTO/TNT (30/70)             | 1.64              | 6900       | nan         | [52]      | 7060                  | 7097                    | 2.3%              | 2.9%                | 209                    | 213                      |                   |                     |                           |                 |                   | 0.27 | 0.60 |
| NTO/TNT (50/50)             | 1.71              | 7370       | 226         | [22]      | 7317                  | 7430                    | -0.7%             | 0.8%                | 230                    | 240                      | 1.9%              | 6.3%                | 3.11                      | 2.98            | 2.93              | 0.28 | 0.63 |
| NTO/TNT (60/40)             | 1.69              | 7300       | nan         | [52]      | 7279                  | 7425                    | -0.3%             | 1.7%                | 226                    | 237                      |                   |                     |                           |                 |                   | 0.28 | 0.64 |
| NTO/TNT (60/40)             | 1.78              | 7840       | 256         | [22]      | 7546                  | 7713                    | -3.8%             | -1.6%               | 251                    | 267                      | -2.0%             | 4.1%                | 3.27                      | 3.04            | 2.97              | 0.28 | 0.66 |
| OCTOL                       | 1.81              | 8476       | 343         | [14]      | 8494                  | 8440                    | 0.2%              | -0.4%               | 321                    | 330                      | -6.4%             | -3.7%               | 2.79                      | 3.07            | 2.90              | 0.27 | 0.62 |
| OCTOL                       | 1.81              | 8450       | 338         | [8]       | 8497                  | 8443                    | 0.6%              | -0.1%               | 321                    | 331                      | -4.9%             | -2.1%               | 2.82                      | 3.07            | 2.90              | 0.27 | 0.62 |
| ont                         | 1.80              | 7330       | nan         | [48]      | 7457                  | 7360                    | 1.7%              | 0.4%                | 247                    | 254                      |                   |                     |                           |                 |                   | 0.26 | 0.58 |
| PAX-41                      | 1.70              | 7830       | nan         | [35]      | 7843                  | 7825                    | 0.2%              | -0.1%               | 264                    | 269                      |                   |                     |                           |                 |                   | 0.27 | 0.60 |
| PBX-9007                    | 1.64              | 8090       | nan         | [8]       | 7776                  | 7807                    | -3.9%             | -3.5%               | 253                    | 259                      |                   |                     |                           |                 |                   | 0.26 | 0.60 |
| PBX-9007                    | 1.60              | NaN        | 265         | [10]      | 7647                  | 7673                    |                   |                     | 241                    | 245                      | -9.0%             | -7.6%               |                           |                 |                   | 0.26 | 0.59 |
| PBX-9010                    | 1.78              | 8363       | 319         | [55]      |                       | 8301                    |                   | -0.7%               |                        | 310                      |                   |                     |                           |                 |                   | 0.28 | 0.65 |
| PBX-9010                    | 1.78              | 8370       | 328         | [8]       |                       | 8297                    |                   | -0.9%               |                        | 309                      |                   |                     |                           |                 |                   | 0.28 | 0.65 |
| PBX-9011                    | 1.77              | 8500       | 324         | [8]       | 8304                  | 8337                    | -2.3%             | -1.9%               | 303                    | 314                      | -6.5%             | -3.2%               | 2.95                      | 3.03            | 2.92              | 0.27 | 0.63 |
| PBX-9205                    | 1.67              | 8170       | nan         | [8]       | 7982                  | 7994                    | -2.3%             | -2.1%               | 270                    | 276                      |                   |                     |                           |                 |                   | 0.27 | 0.60 |
| PBX-9404                    | 1.84              | 8800       | 365         | [14]      |                       | 8769                    |                   | -0.4%               |                        | 360                      |                   |                     |                           |                 |                   | 0.28 | 0.63 |
| PBX-9404                    | 1.84              | 8800       | 375         | [8]       |                       | 8769                    |                   | -0.4%               |                        | 360                      |                   |                     |                           |                 |                   | 0.28 | 0.63 |
| PBX-9407                    | 1.60              | 7910       | 287         | [8]       |                       | 7855                    |                   | -0.7%               |                        | 256                      |                   |                     |                           |                 |                   | 0.26 | 0.60 |
| PBX-9408                    | 1.84              | 8787       | nan         | [14]      |                       | 8770                    |                   | -0.2%               |                        | 361                      |                   |                     |                           |                 |                   | 0.28 | 0.63 |
| PBX9501                     | 1.83              | 8802       | nan         | [7]       | 8774                  | 8743                    | -0.3%             | -0.7%               | 345                    | 357                      |                   |                     |                           |                 |                   | 0.27 | 0.63 |
| PBX9501                     | 1.84              | 8830       | nan         | [8]       | 8801                  | 8771                    | -0.3%             | -0.7%               | 348                    | 361                      |                   |                     |                           |                 |                   | 0.28 | 0.63 |
| PBX9502                     | 1.91              | 7710       | nan         | [8]       |                       | 7906                    |                   | 2.5%                |                        | 292                      |                   |                     |                           |                 |                   | 0.31 | 0.72 |
| PBX9502                     | 1.90              | 7710       | 289         | [10]      |                       | 7858                    |                   | 1.9%                |                        | 287                      |                   |                     |                           |                 |                   | 0.31 | 0.72 |
| PBX9503                     | 1.90              | 7710       | nan         | [8]       |                       | 8043                    |                   | 4.3%                |                        | 303                      |                   |                     |                           |                 |                   | 0.30 | 0.71 |
| pent                        | 1.23              | 6370       | 139         | [8]       | 6839                  | 6546                    | 7.4%              | 2.8%                | 160                    | 146                      | 15.1%             | 5.3%                | 2.59                      | 2.60            | 2.60              | 0.23 | 0.48 |
| pent                        | 1.23              | 6364       | 143.2       | [25]      | 6832                  | 6539                    | 7.4%              | 2.7%                | 159                    | 146                      | 11.4%             | 1.9%                | 2.47                      | 2.59            | 2.60              | 0.23 | 0.48 |
| pent                        | 1.26              | 6590       | 160         | [8]       | 6942                  | 6644                    | 5.3%              | 0.8%                | 168                    | 154                      | 4.9%              | -3.8%               | 2.42                      | 2.62            | 2.61              | 0.23 | 0.49 |
| pent                        | 1.38              | 6910       | 173         | [34]      | 7352                  | 7036                    | 6.4%              | 1.8%                | 201                    | 186                      | 16.4%             | 7.5%                | 2.81                      | 2.70            | 2.67              | 0.24 | 0.51 |
| pent                        | 1.45              | 7178       | 207.4       | [25]      | 7585                  | 7259                    | 5.7%              | 1.1%                | 222                    | 206                      | 6.9%              | -0.7%               | 2.60                      | 2.76            | 2.70              | 0.24 | 0.53 |
| pent                        | 1.45              | 7180       | 208         | [8]       | 7592                  | 7265                    | 5.7%              | 1.2%                | 222                    | 207                      | 6.9%              | -0.7%               | 2.59                      | 2.76            | 2.70              | 0.24 | 0.53 |
| pent                        | 1.50              | 7480       | 240         | [8]       | 7763                  | 7429                    | 3.8%              | -0.7%               | 238                    | 222                      | -0.9%             | -7.4%               | 2.50                      | 2.80            | 2.73              | 0.24 | 0.53 |
| pent                        | 1.53              | 7490       | 225         | [34]      | 7865                  | 7527                    | 5.0%              | 0.5%                | 248                    | 232                      | 10.0%             | 3.0%                | 2.81                      | 2.82            | 2.74              | 0.25 | 0.54 |
| pent                        | 1.60              | 7737       | 263.7       | [34]      | 8095                  | 7746                    | 4.6%              | 0.1%                | 270                    | 254                      | 2.3%              | -3.5%               | 2.63                      | 2.88            | 2.77              | 0.25 | 0.55 |
| pent                        | 1.60              | 7900       | nan         | [10]      | 8105                  | 7756                    | 2.6%              | -1.8%               | 271                    | 255                      |                   |                     |                           |                 |                   | 0.25 | 0.55 |
| pent                        | 1.60              | 7750       | 266         | [8]       | 8105                  | 7756                    | 4.6%              | 0.1%                | 271                    | 255                      | 1.8%              | -4.0%               | 2.61                      | 2.88            | 2.77              | 0.25 | 0.55 |
| pent                        | 1.66              | 7926       | nan         | [51]      | 8320                  | 7962                    | 5.0%              | 0.5%                | 292                    | 278                      |                   |                     |                           |                 |                   | 0.25 | 0.56 |
| pent                        | 1.67              | 7980       | 300         | [10]      | 8344                  | 7985                    | 4.6%              | 0.1%                | 295                    | 280                      | -1.7%             | -6.5%               | 2.54                      | 2.94            | 2.80              | 0.25 | 0.57 |
| pent                        | 1.70              | 8070       | 307         | [8]       | 8447                  | 8083                    | 4.7%              | 0.2%                | 306                    | 292                      | -0.4%             | -5.0%               | 2.61                      | 2.97            | 2.81              | 0.26 | 0.57 |
| pent                        | 1.70              | 8082       | 302.1       | [25]      | 8457                  | 8093                    | 4.6%              | 0.1%                | 307                    | 293                      | 1.5%              | -3.1%               | 2.68                      | 2.97            | 2.81              | 0.26 | 0.57 |
| pent                        | 1.76              | 8260       | nan         | [10]      | 8652                  | 8279                    | 4.7%              | 0.2%                | 328                    | 315                      |                   |                     |                           |                 |                   | 0.26 | 0.58 |
| pent                        | 1.76              | 8270       | 310         | [8]       | 8652                  | 8279                    | 4.6%              | 0.1%                | 328                    | 315                      | 5.7%              | 1.6%                | 2.88                      | 3.02            | 2.83              | 0.26 | 0.58 |
| pent                        | 1.76              | 8270       | 337         | [8]       | 8652                  | 8279                    | 4.6%              | 0.1%                | 328                    | 315                      | -2.8%             | -6.5%               | 2.57                      | 3.02            | 2.83              | 0.26 | 0.58 |
| pent                        | 1.76              | 8263       | 314.3       | [25]      | 8662                  | 8289                    | 4.8%              | 0.3%                | 329                    | 316                      | 4.6%              | 0.6%                | 2.83                      | 3.02            | 2.83              | 0.26 | 0.58 |
| pent                        | 1.77              | 8300       | 335         | [14]      | 8686                  | 8312                    | 4.7%              | 0.1%                | 331                    | 319                      | -1.1%             | -4.8%               | 2.64                      | 3.03            | 2.83              | 0.26 | 0.58 |
| PENTOLITE                   | 1.64              | 7530       | nan         | [8]       | 7612                  | 7416                    | 1.1%              | -1.5%               | 243                    | 237                      |                   |                     |                           |                 |                   | 0.25 | 0.57 |
| PENTOLITE                   | 1.64              | 7520       | 256.3       | [34]      | 7625                  | 7428                    | 1.4%              | -1.2%               | 244                    | 239                      | -4.9%             | -6.9%               | 2.63                      | 2.92            | 2.80              | 0.25 | 0.57 |
| PENTOLITE                   | 1.64              | 7520       | 252         | [34]      | 7625                  | 7428                    | 1.4%              | -1.2%               | 244                    | 239                      | -3.2%             | -5.3%               | 2.69                      | 2.92            | 2.80              | 0.25 | 0.57 |
| PENTOLITE                   | 1.65              | 7465       | nan         | [14]      | 7644                  | 7447                    | 2.4%              | -0.2%               | 246                    | 241                      |                   |                     |                           |                 |                   | 0.26 | 0.57 |
| PENTOLITE                   | 1.66              | 7448       | 241         | [34]      | 7675                  | 7478                    | 3.1%              | 0.4%                | 249                    | 244                      | 3.2%              | 1.1%                | 2.82                      | 2.93            | 2.81              | 0.26 | 0.57 |
| PENTOLITE                   | 1.68              | 7650       | 251         | [8]       | 7739                  | 7540                    | 1.2%              | -1.4%               | 255                    | 250                      | 1.4%              | -0.3%               | 2.92                      | 2.95            | 2.82              | 0.26 | 0.58 |
| PENTOLITE                   | 1.68              | 7520       | nan         | [10]      | 7739                  | 7540                    | 2.9%              | 0.3%                | 255                    | 250                      |                   |                     |                           |                 |                   | 0.26 | 0.58 |
| PENTOLITE                   | 1.70              | 7530       | nan         | [8]       | 7802                  | 7602                    | 3.6%              | 1.0%                | 261                    | 257                      |                   |                     |                           |                 |                   | 0.26 | 0.58 |
| PENTOLITE                   | 1.71              | 7750       | nan         | [8]       | 7833                  | 7633                    | 1.1%              | -1.5%               | 264                    | 260                      |                   |                     |                           |                 |                   | 0.26 | 0.58 |
| PETN/TNT (20/80)            | 1.59              | 6980       | 180         | [45]      | 7075                  | 6975                    | 1.4%              | -0.1%               | 205                    | 204                      | 14.1%             | 13.3%               | 3.30                      | 2.87            | 2.79              | 0.25 | 0.57 |
| PETN/TNT (60/40)            | 1.65              | 7530       | 242         | [45]      | 7772                  | 7542                    | 3.2%              | 0.2%                | 254                    | 247                      | 4.9%              | 2.1%                | 2.87                      | 2.92            | 2.80              | 0.25 | 0.57 |
| PETN/TNT (60/40)            | 1.67              | 7525       | 231         | [45]      | 7836                  | 7605                    | 4.1%              | 1.1%                | 260                    | 254                      | 12.6%             | 9.8%                | 3.09                      | 2.94            | 2.81              | 0.26 | 0.57 |
| PETN/TNT (60/40)            | 1.68              | 7610       | 248         | [45]      | 7868                  | 7636                    | 3.4%              | 0.3%                | 263                    | 257                      | 6.1%              | 3.6%                | 2.92                      | 2.95            | 2.81              | 0.26 | 0.57 |
| PETN/TNT/RDX (20/30/50)     | 1.71              | 7890       | 266.5       | [45]      | 8094                  | 7974                    | 2.6%              | 1.1%                | 282                    | 282                      | 5.7%              | 6.0%                | 2.99                      | 2.98            | 2.85              | 0.26 | 0.59 |
| pf                          | 1.83              | 7290       | 270         | [8]       |                       | 7201                    |                   | -1.2%               |                        | 240                      |                   |                     |                           |                 |                   | 0.28 | 0.65 |
| PICRATOL                    | 1.63              | 6970       | nan         | [8]       | 6997                  | 6989                    | 0.4%              | 0.3%                | 204                    | 206                      |                   |                     |                           |                 |                   | 0.26 | 0.60 |
| picric                      | 1.60              | 7100       | nan         | [8]       | 7073                  | 6943                    | -0.4%             | -2.2%               | 206                    | 204                      |                   |                     |                           |                 |                   | 0.25 | 0.56 |
| picric                      | 1.71              | 7350       | nan         | [48]      | 7401                  | 7268                    | 0.7%              | -1.1%               | 236                    | 236                      |                   |                     |                           |                 |                   | 0.26 | 0.58 |
| picric                      | 1.71              | 7260       | nan         | [8]       | 7401                  | 7268                    | 1.9%              | 0.1%                | 236                    | 236                      |                   |                     |                           |                 |                   | 0.26 | 0.58 |
| picric                      | 1.76              | 7570       | nan         | [8]       | 7550                  | 7416                    | -0.3%             | -2.0%               | 249                    | 251                      |                   |                     |                           |                 |                   | 0.26 | 0.59 |
| ppam                        | 1.73              | 8100       | nan         | [48]      | 8268                  | 8125                    | 2.1%              | 0.3%                | 296                    | 296                      |                   |                     |                           |                 |                   | 0.26 | 0.60 |
| PRNQ/HMX/CARNAUBA (30/68/2) | 1.64              | 7900       | nan         | [35]      | 7589                  | 7803                    | -3.9%             | -1.2%               | 241                    | 253                      |                   |                     |                           |                 |                   | 0.28 | 0.64 |
| PRNQ/NQ/HMX (34/35/31)      | 1.59              | 7710       | nan         | [35]      | 7204                  | 7647                    | -6.6%             | -0.8%               | 213                    | 230                      |                   |                     |                           |                 |                   | 0.30 | 0.70 |
| PYX/PE (95/5)               | 1.56              | 7097       | nan         | [14]      | 6782                  | 6766                    | -4.4%             | -4.7%               | 186                    | 188                      |                   |                     |                           |                 |                   | 0.25 | 0.56 |

DEoS DATABASE

Number of Explosives 238

|                | Number of data |     | residuals D |          | residuals P |          | Gamma ( $\gamma$ ) correlation (CHNO explosives) |          | Jones and Grüneisen parameters (DEoS Model) |      |      |
|----------------|----------------|-----|-------------|----------|-------------|----------|--------------------------------------------------|----------|---------------------------------------------|------|------|
|                | D              | P   | velocity    | pressure | velocity    | pressure | $r$                                              | $\alpha$ | $\Gamma$                                    |      |      |
| KJ (only CHNO) | 449            | 224 | RMRS        | 3.4%     | 7.0%        | 6.0%     | 0.44                                             | 0.53     | average values                              | 0.27 | 0.60 |
| DEoS           | 519            | 263 | MAPR        | 2.5%     | 5.6%        | 4.9%     |                                                  |          |                                             |      |      |
|                |                |     | P97.5       | 8.2%     | 17.0%       | 12.6%    |                                                  |          |                                             |      |      |

| Acr                      | experimental data |            |             | reference | calculated D          |                         |                   |                     |                        | calculated P             |                   |                     |                           |                 | Y                 |  |      | $\alpha$ | $\Gamma$ |
|--------------------------|-------------------|------------|-------------|-----------|-----------------------|-------------------------|-------------------|---------------------|------------------------|--------------------------|-------------------|---------------------|---------------------------|-----------------|-------------------|--|------|----------|----------|
|                          | density (g/cc)    | Dexp (m/s) | Pexp (kbar) |           | D <sub>KJ</sub> (m/s) | D <sub>DEoS</sub> (m/s) | RRD <sub>KJ</sub> | RRD <sub>DEoS</sub> | P <sub>KJ</sub> (kbar) | P <sub>DEoS</sub> (kbar) | RRP <sub>KJ</sub> | RRP <sub>DEoS</sub> | Y <sub>experimental</sub> | Y <sub>KJ</sub> | Y <sub>DEoS</sub> |  |      |          |          |
| rdx                      | 1.00              | 5981       | nan         | [14]      | 6049                  | 5942                    | 1.1%              | -0.7%               | 106                    | 100                      |                   |                     |                           |                 |                   |  | 0.22 | 0.46     |          |
| rdx                      | 1.00              | 6100       | 89          | [8]       | 6049                  | 5942                    | -0.8%             | -2.6%               | 106                    | 100                      | 18.7%             | 12.6%               | 3.18                      | 2.46            | 2.52              |  | 0.22 | 0.46     |          |
| rdx                      | 1.00              | 6030       | 108         | [38]      | 6049                  | 5942                    | 0.3%              | -1.5%               | 106                    | 100                      | -2.2%             | -7.2%               | 2.37                      | 2.46            | 2.52              |  | 0.22 | 0.46     |          |
| rdx                      | 1.07              | 6260       | 116         | [34]      | 6289                  | 6185                    | 0.5%              | -1.2%               | 121                    | 115                      | 4.3%              | -1.0%               | 2.61                      | 2.50            | 2.56              |  | 0.23 | 0.47     |          |
| rdx                      | 1.10              | 6180       | 122         | [8]       | 6391                  | 6290                    | 3.4%              | 1.8%                | 128                    | 121                      | 4.8%              | -0.4%               | 2.44                      | 2.51            | 2.58              |  | 0.23 | 0.48     |          |
| rdx                      | 1.10              | 6115       | 112.7       | [34]      | 6391                  | 6290                    | 4.5%              | 2.9%                | 128                    | 121                      | 13.4%             | 7.8%                | 2.65                      | 2.51            | 2.58              |  | 0.23 | 0.48     |          |
| rdx                      | 1.17              | 6648       | 134.4       | [34]      | 6641                  | 6543                    | -0.1%             | -1.6%               | 145                    | 139                      | 8.2%              | 3.1%                | 2.86                      | 2.56            | 2.62              |  | 0.23 | 0.49     |          |
| rdx                      | 1.20              | 6770       | 152         | [8]       | 6733                  | 6637                    | -0.5%             | -2.0%               | 152                    | 145                      | 0.1%              | -4.4%               | 2.62                      | 2.58            | 2.64              |  | 0.23 | 0.50     |          |
| rdx                      | 1.22              | 6609       | 148.9       | [34]      | 6788                  | 6693                    | 2.7%              | 1.3%                | 156                    | 149                      | 4.9%              | 0.3%                | 2.57                      | 2.59            | 2.65              |  | 0.23 | 0.50     |          |
| rdx                      | 1.29              | 7000       | 164         | [34]      | 7041                  | 6950                    | 0.6%              | -0.7%               | 176                    | 169                      | 7.2%              | 3.2%                | 2.85                      | 2.64            | 2.68              |  | 0.24 | 0.52     |          |
| rdx                      | 1.29              | 7036       | 166.2       | [38]      | 7041                  | 6950                    | 0.1%              | -1.2%               | 176                    | 169                      | 5.8%              | 1.8%                | 2.84                      | 2.64            | 2.68              |  | 0.24 | 0.52     |          |
| rdx                      | 1.29              | 7000       | 166         | [8]       | 7041                  | 6950                    | 0.6%              | -0.7%               | 176                    | 169                      | 5.9%              | 1.9%                | 2.81                      | 2.64            | 2.68              |  | 0.24 | 0.52     |          |
| rdx                      | 1.40              | 7460       | 213         | [8]       | 7417                  | 7333                    | -0.6%             | -1.7%               | 207                    | 201                      | -2.8%             | -5.4%               | 2.66                      | 2.72            | 2.74              |  | 0.25 | 0.54     |          |
| rdx                      | 1.46              | 7600       | 211         | [8]       | 7622                  | 7542                    | 0.3%              | -0.8%               | 225                    | 221                      | 6.7%              | 4.6%                | 3.00                      | 2.77            | 2.76              |  | 0.25 | 0.55     |          |
| rdx                      | 1.46              | 7600       | 208         | [34]      | 7622                  | 7542                    | 0.3%              | -0.8%               | 225                    | 221                      | 8.3%              | 6.1%                | 3.05                      | 2.77            | 2.76              |  | 0.25 | 0.55     |          |
| rdx                      | 1.46              | 7626       | 209.8       | [38]      | 7622                  | 7542                    | -0.1%             | -1.1%               | 225                    | 221                      | 7.3%              | 5.2%                | 3.05                      | 2.77            | 2.76              |  | 0.25 | 0.55     |          |
| rdx                      | 1.59              | 8077       | 259         | [38]      | 8066                  | 7994                    | -0.1%             | -1.0%               | 267                    | 266                      | 3.1%              | 2.7%                | 3.00                      | 2.87            | 2.82              |  | 0.26 | 0.58     |          |
| rdx                      | 1.60              | 8250       | nan         | [10]      | 8101                  | 8029                    | -1.8%             | -2.7%               | 270                    | 270                      |                   |                     |                           |                 |                   |  | 0.26 | 0.58     |          |
| rdx                      | 1.60              | 8130       | 263         | [8]       | 8101                  | 8029                    | -0.4%             | -1.2%               | 270                    | 270                      | 2.8%              | 2.6%                | 3.02                      | 2.88            | 2.82              |  | 0.26 | 0.58     |          |
| rdx                      | 1.66              | 8240       | nan         | [8]       | 8306                  | 8237                    | 0.8%              | 0.0%                | 291                    | 293                      |                   |                     |                           |                 |                   |  | 0.26 | 0.59     |          |
| rdx                      | 1.71              | NaN        | 314         | [2]       | 8477                  | 8411                    |                   |                     | 309                    | 313                      | -1.6%             | -0.4%               |                           |                 |                   |  | 0.27 | 0.60     |          |
| rdx                      | 1.72              | 8460       | 313         | [8]       | 8511                  | 8446                    | 0.6%              | -0.2%               | 313                    | 317                      | -0.1%             | 1.3%                | 2.93                      | 2.99            | 2.87              |  | 0.27 | 0.60     |          |
| rdx                      | 1.72              | 8528       | 310         | [38]      | 8511                  | 8446                    | -0.2%             | -1.0%               | 313                    | 317                      | 0.8%              | 2.3%                | 3.04                      | 2.99            | 2.87              |  | 0.27 | 0.60     |          |
| rdx                      | 1.72              | 8460       | 308.5       | [34]      | 8511                  | 8446                    | 0.6%              | -0.2%               | 313                    | 317                      | 1.3%              | 2.7%                | 2.99                      | 2.99            | 2.87              |  | 0.27 | 0.60     |          |
| rdx                      | 1.76              | 8622       | 325         | [34]      | 8655                  | 8592                    | 0.4%              | -0.3%               | 328                    | 335                      | 0.9%              | 3.0%                | 3.03                      | 3.02            | 2.89              |  | 0.27 | 0.61     |          |
| rdx                      | 1.77              | 8700       | 338         | [8]       | 8682                  | 8620                    | -0.2%             | -0.9%               | 331                    | 338                      | -2.1%             | 0.0%                | 2.96                      | 3.03            | 2.89              |  | 0.27 | 0.61     |          |
| rdx                      | 1.80              | 8750       | 341         | [8]       | 8785                  | 8724                    | 0.4%              | -0.3%               | 342                    | 351                      | 0.4%              | 3.0%                | 3.04                      | 3.06            | 2.90              |  | 0.27 | 0.62     |          |
| rdx                      | 1.80              | 8754       | 347         | [31]      | 8785                  | 8724                    | 0.3%              | -0.3%               | 342                    | 351                      | -1.4%             | 1.2%                | 2.98                      | 3.06            | 2.90              |  | 0.27 | 0.62     |          |
| rdx                      | 1.80              | 8800       | nan         | [48]      | 8785                  | 8724                    | -0.2%             | -0.9%               | 342                    | 351                      |                   |                     |                           |                 |                   |  | 0.27 | 0.62     |          |
| rdx                      | 1.80              | NaN        | 350         | [31]      | 8785                  | 8724                    |                   |                     | 342                    | 351                      | -2.2%             | 0.3%                |                           |                 |                   |  | 0.27 | 0.62     |          |
| rdx                      | 1.80              | NaN        | 385         | [31]      | 8785                  | 8724                    |                   |                     | 342                    | 351                      | -11.1%            | -8.8%               |                           |                 |                   |  | 0.27 | 0.62     |          |
| RDV/ESTANE (80/20)       | 1.20              | 6290       | nan         | [28]      | 6150                  | 6148                    | -2.2%             | -2.3%               | 127                    | 123                      |                   |                     |                           |                 |                   |  | 0.24 | 0.52     |          |
| RDV/EVA (80/20)          | 1.28              | 6500       | nan         | [28]      | 6538                  | 6557                    | 0.6%              | 0.9%                | 151                    | 148                      |                   |                     |                           |                 |                   |  | 0.24 | 0.53     |          |
| RDV/EVA (95/5)           | 1.56              | 7630       | nan         | [22]      | 7847                  | 7803                    | 2.8%              | 2.3%                | 250                    | 249                      |                   |                     |                           |                 |                   |  | 0.26 | 0.58     |          |
| RDV/EVA (95/5)           | 1.63              | 8248       | 269         | [26]      | 8065                  | 8027                    | -2.2%             | -2.7%               | 271                    | 273                      | 0.8%              | 1.5%                | 3.12                      | 2.91            | 2.84              |  | 0.26 | 0.59     |          |
| RDV/EXON (90/10)         | 1.79              | 8404       | 320         | [14]      |                       | 8374                    |                   | -0.4%               |                        | 317                      |                   | -0.9%               |                           |                 |                   |  | 0.28 | 0.65     |          |
| RDV/GAP (84/16)          | 1.59              | 8074       | nan         | [4]       | 7976                  | 7949                    | -1.2%             | -1.6%               | 261                    | 263                      |                   |                     |                           |                 |                   |  | 0.26 | 0.58     |          |
| RDV/HTPB (80/20)         | 1.43              | 7200       | nan         | [28]      | 6767                  | 6878                    | -6.0%             | -4.5%               | 175                    | 177                      |                   |                     |                           |                 |                   |  | 0.26 | 0.57     |          |
| RDV/HTPB (82/18)         | 1.52              | 7526       | nan         | [4]       | 7132                  | 7239                    | -5.2%             | -3.8%               | 203                    | 207                      |                   |                     |                           |                 |                   |  | 0.26 | 0.59     |          |
| RDV/HTPB (85/15)         | 1.43              | 7200       | nan         | [28]      | 6958                  | 7017                    | -3.4%             | -2.5%               | 185                    | 186                      |                   |                     |                           |                 |                   |  | 0.25 | 0.57     |          |
| RDV/PIB (91/9)           | 1.61              | 8055       | nan         | [44]      | 7814                  | 7836                    | -3.0%             | -2.7%               | 253                    | 256                      |                   |                     |                           |                 |                   |  | 0.26 | 0.59     |          |
| RDV/SYLGARD (85/15)      | 1.54              | 7682       | nan         | [3]       |                       | 7429                    |                   | -3.3%               |                        | 218                      |                   |                     |                           |                 |                   |  | 0.27 | 0.62     |          |
| RDV/TATB/HTPB (65/20/15) | 1.49              | 7100       | nan         | [28]      | 6927                  | 7035                    | -2.4%             | -0.9%               | 189                    | 192                      |                   |                     |                           |                 |                   |  | 0.26 | 0.59     |          |
| RDV/TATB/HTPB (70/15/15) | 1.47              | 7120       | nan         | [28]      | 6921                  | 7015                    | -2.8%             | -1.5%               | 187                    | 189                      |                   |                     |                           |                 |                   |  | 0.26 | 0.58     |          |
| RDV/TATB/HTPB (75/10/15) | 1.45              | 7150       | nan         | [28]      | 6913                  | 6994                    | -3.3%             | -2.2%               | 184                    | 186                      |                   |                     |                           |                 |                   |  | 0.26 | 0.57     |          |
| RDV/TFNA (65/35)         | 1.75              | 8220       | 324         | [14]      |                       | 8088                    |                   | -1.6%               |                        | 289                      |                   | -10.8%              |                           |                 |                   |  | 0.28 | 0.66     |          |
| RDV/TNT (30/70)          | 1.64              | 7230       | nan         | [52]      | 7354                  | 7305                    | 1.7%              | 1.0%                | 226                    | 229                      |                   |                     |                           |                 |                   |  | 0.26 | 0.58     |          |
| RDV/TNT (50/50)          | 1.63              | 7660       | 231         | [8]       | 7579                  | 7522                    | -1.1%             | -1.8%               | 240                    | 241                      | 3.7%              | 4.3%                | 3.14                      | 2.91            | 2.83              |  | 0.26 | 0.58     |          |
| RDV/TNT (50/50)          | 1.65              | 7540       | 251         | [45]      | 7642                  | 7586                    | 1.4%              | 0.6%                | 246                    | 248                      | -2.2%             | -1.3%               | 2.74                      | 2.92            | 2.83              |  | 0.26 | 0.58     |          |
| RDV/TNT (60/40)          | 1.49              | 7195       | 192         | [38]      | 7256                  | 7189                    | 0.8%              | -0.1%               | 207                    | 204                      | 7.8%              | 6.4%                | 3.02                      | 2.79            | 2.77              |  | 0.25 | 0.55     |          |
| RDV/TNT (60/40)          | 1.52              | 7250       | 200         | [38]      | 7352                  | 7287                    | 1.4%              | 0.5%                | 215                    | 213                      | 7.7%              | 6.7%                | 2.99                      | 2.82            | 2.78              |  | 0.25 | 0.56     |          |
| RDV/TNT (60/40)          | 1.54              | 7300       | 206         | [38]      | 7417                  | 7352                    | 1.6%              | 0.7%                | 221                    | 220                      | 7.3%              | 6.6%                | 2.98                      | 2.83            | 2.79              |  | 0.25 | 0.56     |          |
| RDV/TNT (60/40)          | 1.59              | 7415       | 219         | [38]      | 7577                  | 7515                    | 2.2%              | 1.3%                | 236                    | 236                      | 7.6%              | 7.6%                | 2.99                      | 2.87            | 2.81              |  | 0.26 | 0.57     |          |
| RDV/TNT (60/40)          | 1.68              | 7640       | nan         | [52]      | 7866                  | 7808                    | 3.0%              | 2.2%                | 263                    | 266                      |                   |                     |                           |                 |                   |  | 0.26 | 0.59     |          |
| RDV/TNT (60/40)          | 1.72              | 7890       | 287         | [8]       | 7995                  | 7938                    | 1.3%              | 0.6%                | 276                    | 281                      | -3.9%             | -2.3%               | 2.73                      | 2.99            | 2.86              |  | 0.26 | 0.60     |          |
| RDV/TNT (60/40)          | 1.72              | 7840       | 287         | [22]      | 7995                  | 7938                    | 2.0%              | 1.3%                | 276                    | 281                      | -3.9%             | -2.3%               | 2.68                      | 2.99            | 2.86              |  | 0.26 | 0.60     |          |
| RDV/TNT (60/40)          | 1.73              | NaN        | 268         | [31]      | 8027                  | 7971                    |                   |                     | 279                    | 284                      | 4.1%              | 6.0%                |                           |                 |                   |  | 0.27 | 0.60     |          |
| RDV/TNT (60/40)          | 1.73              | 7977       | 275         | [31]      | 8027                  | 7971                    | 0.6%              | -0.1%               | 279                    | 284                      | 1.5%              | 3.4%                | 3.00                      | 3.00            | 2.87              |  | 0.27 | 0.60     |          |
| RDV/TNT (60/40)          | 1.73              | NaN        | 292         | [31]      | 8027                  | 7971                    |                   |                     | 279                    | 284                      | -4.5%             | -2.7%               |                           |                 |                   |  | 0.27 | 0.60     |          |
| RDV/TNT (60/40)          | 1.74              | 8090       | nan         | [8]       | 8059                  | 8003                    | -0.4%             | -1.1%               | 282                    | 288                      |                   |                     |                           |                 |                   |  | 0.27 | 0.60     |          |
| RDV/TNT (60/40)          | 1.79              | 8130       | 309         | [45]      | 8220                  | 8166                    | 1.1%              | 0.4%                | 299                    | 307                      | -3.3%             | -0.7%               | 2.83                      | 3.05            | 2.89              |  | 0.27 | 0.61     |          |
| RDV/TNT (64/36)          | 1.71              | 8030       | 294         | [14]      | 8024                  | 7966                    | -0.1%             | -0.8%               | 277                    | 282                      | -5.7%             | -4.2%               | 2.76                      | 2.98            | 2.86              |  | 0.26 | 0.60     |          |
| RDV/TNT (65/35)          | 1.72              | 8040       | 292         | [8]       | 8060                  | 8002                    | 0.2%              | -0.5%               | 280                    | 285                      | -4.0%             | -2.4%               | 2.81                      | 2.99            | 2.86              |  | 0.26 | 0.60     |          |
| RDV/TNT (70/30)          | 1.49              | 7290       | 197         | [38]      | 7374                  | 7304                    | 1.2%              | 0.2%                | 214                    | 211                      | 8.5%              | 7.0%                | 3.02                      | 2.79            | 2.77              |  | 0.25 | 0.55     |          |
| RDV/TNT (70/30)          | 1.52              | 7370       | 207         | [38]      | 7472                  | 7403                    | 1.4%              | 0.5%                | 222                    | 220                      | 7.5%              | 6.3%                | 2.99                      | 2.82            | 2.78              |  | 0.25 | 0.56     |          |
| RDV/TNT (70/30)          | 1.55              | 7460       | 216         | [38]      | 7570                  | 7503                    | 1.5%              | 0.6%                | 231                    | 230                      | 7.1%              | 6.4%                | 2.99                      | 2.84            | 2.80              |  | 0.25 | 0.57     |          |
| RDV/TNT (70/30)          | 1.59              | 7580       | 227         | [38]      | 7701                  | 7635                    | 1.6%              | 0.7%                | 243                    | 243                      | 7.2%              | 7.1%                | 3.02                      | 2.87            | 2.81              |  | 0.26 | 0.57     |          |
| RDV/TNT (70/30)          | 1.59              | 7580       | 216         | [45]      | 7701                  | 7635                    | 1.6%              | 0.7%                | 243                    | 243                      | 12.7%             | 12.5%               | 3.23                      | 2.87            | 2.81              |  | 0.26 | 0.57     |          |
| RDV/TNT (70/30)          | 1.73              | 8060       | nan         | [8]       | 8158                  | 8099                    | 1.2%              | 0.5%                | 288                    | 293                      |                   |                     |                           |                 |                   |  | 0.27 | 0.60     |          |

DEoS DATABASE

Number of Explosives 238

| Statistics     | Number of data |     | residuals D |      | residuals P |       | Gamma ( $\gamma$ ) correlation (CHNO explosives) |      | Jones and Grüneisen parameters (DEoS Model) |                         |          |
|----------------|----------------|-----|-------------|------|-------------|-------|--------------------------------------------------|------|---------------------------------------------|-------------------------|----------|
|                | D              | P   | KJ velocity | DEoS | KJ pressure | DEoS  | r                                                | 0.44 | 0.53                                        | $\alpha$                | $\Gamma$ |
| KJ (only CHNO) | 449            | 224 | RMRS 3.4%   | 1.7% | RMRS 7.0%   | 6.0%  |                                                  |      |                                             | average values 0.27     | 0.60     |
| DEoS           | 519            | 263 | MAPR 2.5%   | 1.3% | MAPR 5.6%   | 4.9%  |                                                  |      |                                             | standard deviation 0.02 | 0.06     |
|                |                |     | P97.5 8.2%  | 3.9% | P97.5 17.0% | 12.6% |                                                  |      |                                             |                         |          |

| Acr                 | experimental data |            |             | reference | calculated D          |                         |                   |                     | calculated P           |                          |                   |                     | $\gamma_{experimental}$ | $\gamma_{KJ}$ | $\gamma_{DEoS}$ | $\alpha$ | $\Gamma$ |
|---------------------|-------------------|------------|-------------|-----------|-----------------------|-------------------------|-------------------|---------------------|------------------------|--------------------------|-------------------|---------------------|-------------------------|---------------|-----------------|----------|----------|
|                     | density (g/cc)    | Dexp (m/s) | Pexp (kbar) |           | D <sub>KJ</sub> (m/s) | D <sub>DEoS</sub> (m/s) | RRD <sub>KJ</sub> | RRD <sub>DEoS</sub> | P <sub>KJ</sub> (kbar) | P <sub>DEoS</sub> (kbar) | RRP <sub>KJ</sub> | RRP <sub>DEoS</sub> |                         |               |                 |          |          |
| RDX/TNT (75/25)     | 1.62              | 7950       | 265         | [8]       | 7861                  | 7795                    | -1.1%             | -1.9%               | 257                    | 257                      | -3.1%             | -2.9%               | 2.86                    | 2.90          | 2.83            | 0.26     | 0.58     |
| RDX/TNT (75/25)     | 1.74              | 8200       | 316         | [10]      | 8256                  | 8196                    | 0.7%              | 0.0%                | 296                    | 302                      | -6.3%             | -4.5%               | 2.70                    | 3.00          | 2.87            | 0.27     | 0.60     |
| RDX/TNT (75/25)     | 1.76              | 8300       | 323.3       | [34]      | 8312                  | 8253                    | 0.1%              | -0.6%               | 302                    | 308                      | -6.6%             | -4.6%               | 2.74                    | 3.02          | 2.88            | 0.27     | 0.61     |
| RDX/TNT (75/25)     | 1.76              | 8300       | 316         | [8]       | 8322                  | 8263                    | 0.3%              | -0.4%               | 303                    | 310                      | -4.1%             | -2.0%               | 2.84                    | 3.02          | 2.88            | 0.27     | 0.61     |
| RDX/TNT (77/23)     | 1.74              | 8250       | 313         | [8]       | 8282                  | 8222                    | 0.4%              | -0.3%               | 298                    | 304                      | -4.8%             | -3.0%               | 2.78                    | 3.00          | 2.87            | 0.27     | 0.60     |
| RDX/TNT (77/23)     | 1.75              | 8274       | 316         | [34]      | 8321                  | 8262                    | 0.6%              | -0.1%               | 302                    | 308                      | -4.4%             | -2.4%               | 2.80                    | 3.01          | 2.88            | 0.27     | 0.61     |
| RDX/TNT (77/23)     | 1.76              | 8290       | 313         | [34]      | 8331                  | 8272                    | 0.5%              | -0.2%               | 303                    | 310                      | -3.1%             | -1.1%               | 2.85                    | 3.02          | 2.88            | 0.27     | 0.61     |
| RDX/TNT (78/22)     | 1.76              | 8310       | 317         | [8]       | 8361                  | 8302                    | 0.6%              | -0.1%               | 306                    | 312                      | -3.5%             | -1.4%               | 2.83                    | 3.02          | 2.88            | 0.27     | 0.61     |
| RDX/TNT (80/20)     | 1.50              | 7500       | 210         | [38]      | 7525                  | 7452                    | 0.3%              | -0.6%               | 224                    | 221                      | 6.5%              | 5.0%                | 3.02                    | 2.80          | 2.78            | 0.25     | 0.56     |
| RDX/TNT (80/20)     | 1.53              | 7570       | 222         | [38]      | 7624                  | 7553                    | 0.7%              | -0.2%               | 233                    | 230                      | 4.8%              | 3.7%                | 2.95                    | 2.82          | 2.79            | 0.25     | 0.56     |
| RDX/TNT (80/20)     | 1.56              | 7675       | 231         | [38]      | 7724                  | 7654                    | 0.6%              | -0.3%               | 242                    | 240                      | 4.7%              | 4.0%                | 2.98                    | 2.85          | 2.80            | 0.26     | 0.57     |
| RDX/TNT (80/20)     | 1.60              | 7745       | 242         | [38]      | 7857                  | 7789                    | 1.4%              | 0.6%                | 254                    | 254                      | 5.1%              | 5.0%                | 2.97                    | 2.88          | 2.82            | 0.26     | 0.58     |
| RDX/TNT (90/10)     | 1.51              | 7570       | 217         | [38]      | 7676                  | 7601                    | 1.4%              | 0.4%                | 234                    | 231                      | 7.7%              | 6.2%                | 2.99                    | 2.81          | 2.78            | 0.25     | 0.56     |
| RDX/TNT (90/10)     | 1.55              | 7740       | 231         | [38]      | 7811                  | 7738                    | 0.9%              | 0.0%                | 246                    | 244                      | 6.6%              | 5.7%                | 3.02                    | 2.84          | 2.80            | 0.25     | 0.57     |
| RDX/TNT (90/10)     | 1.59              | 7840       | 247         | [38]      | 7945                  | 7875                    | 1.3%              | 0.4%                | 259                    | 258                      | 4.9%              | 4.6%                | 2.96                    | 2.87          | 2.82            | 0.26     | 0.58     |
| RDX/TNT (90/10)     | 1.61              | 7910       | 256         | [38]      | 8013                  | 7943                    | 1.3%              | 0.4%                | 266                    | 266                      | 3.8%              | 3.7%                | 2.93                    | 2.89          | 2.83            | 0.26     | 0.58     |
| RDX/VITON (95/5)    | 1.76              | 8424       | nan         | [44]      | 8387                  |                         |                   | -0.4%               |                        |                          |                   |                     |                         |               |                 | 0.28     | 0.63     |
| RDX/WAX (94/6)      | 1.66              | 8380       | nan         | [24]      | 8055                  | 8068                    | -3.9%             | -3.7%               | 274                    | 279                      |                   |                     |                         |               |                 | 0.27     | 0.60     |
| RDX/WAX (95/5)      | 1.64              | 8100       | nan         | [24]      | 8031                  | 8027                    | -0.9%             | -0.9%               | 270                    | 274                      |                   |                     |                         |               |                 | 0.26     | 0.60     |
| RX23                | 1.42              | 8640       | 258         | [8]       | 7811                  | 8343                    | -9.6%             | -3.4%               | 232                    | 247                      | -10.1%            | -4.4%               | 3.11                    | 2.73          | 3.01            | 0.29     | 0.68     |
| RX26                | 1.84              | 8240       | 340         | [8]       | 8172                  | 8285                    | -0.8%             | 0.5%                | 300                    | 318                      | -11.7%            | -6.4%               | 2.67                    | 3.09          | 2.97            | 0.28     | 0.66     |
| RX27                | 1.64              | 6930       | 200         | [8]       | 6673                  |                         |                   | -3.7%               |                        | 189                      |                   |                     |                         |               | 0.27            | 0.60     |          |
| RX36                | 1.83              | 8510       | 335         | [8]       | 8295                  |                         |                   | -2.5%               |                        | 323                      |                   |                     |                         |               | 0.27            | 0.61     |          |
| RX41                | 1.86              | 8810       | 350         | [8]       | 8595                  |                         |                   | -2.4%               |                        | 348                      |                   |                     |                         |               | 0.28            | 0.64     |          |
| RX45                | 1.75              | 7710       | 250         | [8]       | 7871                  |                         |                   | 2.1%                |                        | 263                      |                   |                     |                         |               | 0.32            | 0.75     |          |
| RX47                | 1.82              | 7660       | 260         | [8]       | 7638                  |                         |                   | -0.3%               |                        | 267                      |                   |                     |                         |               | 0.29            | 0.66     |          |
| RX48                | 1.85              | 7760       | 263         | [8]       | 7696                  |                         |                   | -0.8%               |                        | 278                      |                   |                     |                         |               | 0.28            | 0.64     |          |
| RX52AE              | 1.78              | 7570       | nan         | [10]      | 7665                  |                         |                   | 1.3%                |                        | 263                      |                   |                     |                         |               | 0.29            | 0.66     |          |
| schembl             | 1.64              | 8190       | nan         | [48]      | 8119                  |                         |                   | 4.9%                |                        | 309                      |                   |                     |                         |               | 0.25            | 0.54     |          |
| tacot               | 1.85              | 7250       | nan         | [8]       | 7440                  |                         |                   | 2.6%                |                        | 250                      |                   |                     |                         |               | 0.27            | 0.61     |          |
| tat                 | 1.02              | 5500       | nan         | [41]      | 5301                  |                         |                   | -3.6%               |                        | 83                       |                   |                     |                         |               | 0.24            | 0.52     |          |
| tat                 | 1.50              | 7300       | nan         | [27]      | 6723                  |                         |                   | -7.9%               |                        | 178                      |                   |                     |                         |               | 0.28            | 0.64     |          |
| tat                 | 1.54              | 7500       | nan         | [11]      | 6842                  |                         |                   | -8.8%               |                        | 188                      |                   |                     |                         |               | 0.28            | 0.65     |          |
| tatb                | 1.83              | 7580       | 260         | [8]       | 7608                  |                         |                   | 0.4%                |                        | 259                      |                   |                     |                         |               | 0.29            | 0.68     |          |
| tatb                | 1.85              | 7660       | 259         | [8]       | 7667                  |                         |                   | 0.1%                |                        | 265                      |                   |                     |                         |               | 0.29            | 0.68     |          |
| tatb                | 1.88              | 7760       | nan         | [8]       | 7755                  |                         |                   | -0.1%               |                        | 274                      |                   |                     |                         |               | 0.30            | 0.69     |          |
| tatb                | 1.90              | 7860       | 315         | [14]      | 7799                  |                         |                   | -0.8%               |                        | 278                      |                   |                     |                         |               | 0.30            | 0.69     |          |
| tatb                | 1.94              | 7990       | nan         | [48]      | 7930                  |                         |                   | -0.7%               |                        | 291                      |                   |                     |                         |               | 0.30            | 0.70     |          |
| TATB/KELF (90/10)   | 1.91              | 7630       | nan         | [14]      | 7728                  |                         |                   | 1.3%                |                        | 276                      |                   |                     |                         |               | 0.32            | 0.76     |          |
| TATB/TNT (30/70)    | 1.65              | 6930       | nan         | [52]      | 7028                  |                         |                   | 1.4%                |                        | 208                      |                   |                     |                         |               | 0.26            | 0.60     |          |
| tetryl              | 1.20              | 6340       | nan         | [8]       | 6139                  |                         |                   | -3.2%               |                        | 126                      |                   |                     |                         |               | 0.23            | 0.48     |          |
| tetryl              | 1.36              | 6680       | 142         | [8]       | 6638                  |                         |                   | -0.6%               |                        | 162                      |                   |                     |                         |               | 0.24            | 0.51     |          |
| tetryl              | 1.44              | 6875       | nan         | [10]      | 6887                  |                         |                   | 0.2%                |                        | 182                      |                   |                     |                         |               | 0.24            | 0.53     |          |
| tetryl              | 1.61              | 7580       | 226         | [8]       | 7417                  |                         |                   | -2.1%               |                        | 228                      |                   |                     |                         |               | 0.25            | 0.56     |          |
| tetryl              | 1.68              | 7500       | 239         | [8]       | 7635                  |                         |                   | 1.8%                |                        | 248                      |                   |                     |                         |               | 0.26            | 0.57     |          |
| tetryl              | 1.70              | 7560       | nan         | [48]      | 7698                  |                         |                   | 0.1%                |                        | 254                      |                   |                     |                         |               | 0.26            | 0.57     |          |
| tetryl              | 1.71              | 7850       | nan         | [8]       | 7729                  |                         |                   | -1.5%               |                        | 257                      |                   |                     |                         |               | 0.26            | 0.58     |          |
| tetryl              | 1.73              | 7720       | nan         | [8]       | 7791                  |                         |                   | 0.9%                |                        | 263                      |                   |                     |                         |               | 0.26            | 0.58     |          |
| TKX-50/VITON (95/5) | 1.77              | 8690       | nan         | [35]      | 8926                  |                         |                   | 2.7%                |                        | 352                      |                   |                     |                         |               | 0.29            | 0.68     |          |
| tna                 | 1.72              | 7300       | nan         | [48]      | 7382                  |                         |                   | 1.1%                |                        | 235                      |                   |                     |                         |               | 0.27            | 0.60     |          |
| tnan                | 1.61              | 6800       | nan         | [48]      | 7046                  |                         |                   | 3.6%                |                        | 205                      |                   |                     |                         |               | 0.25            | 0.57     |          |
| tnb                 | 1.69              | 7350       | nan         | [48]      | 7429                  |                         |                   | 1.1%                |                        | 236                      |                   |                     |                         |               | 0.25            | 0.56     |          |
| tneof               | 1.80              | 8160       | nan         | [48]      | 8489                  |                         |                   | 4.0%                |                        | 320                      |                   |                     |                         |               | 0.26            | 0.60     |          |
| tnetb               | 1.23              | 6280       | nan         | [49]      | 6739                  |                         |                   | 7.3%                |                        | 155                      |                   |                     |                         |               | 0.23            | 0.48     |          |
| tnetb               | 1.33              | 6640       | nan         | [49]      | 7076                  |                         |                   | 6.6%                |                        | 182                      |                   |                     |                         |               | 0.23            | 0.50     |          |
| tnetb               | 1.39              | 6860       | nan         | [49]      | 7278                  |                         |                   | 6.1%                |                        | 198                      |                   |                     |                         |               | 0.24            | 0.51     |          |
| tnetb               | 1.45              | 7090       | nan         | [42]      | 7480                  |                         |                   | 5.5%                |                        | 216                      |                   |                     |                         |               | 0.24            | 0.52     |          |
| tnetb               | 1.48              | 7180       | nan         | [49]      | 7582                  |                         |                   | 5.6%                |                        | 225                      |                   |                     |                         |               | 0.24            | 0.53     |          |
| tnetb               | 1.50              | 7240       | nan         | [42]      | 7649                  |                         |                   | 5.6%                |                        | 231                      |                   |                     |                         |               | 0.24            | 0.53     |          |
| tnetb               | 1.54              | 7390       | nan         | [42]      | 7784                  |                         |                   | 5.3%                |                        | 244                      |                   |                     |                         |               | 0.25            | 0.54     |          |
| tnetb               | 1.55              | 7400       | nan         | [42]      | 7818                  |                         |                   | 5.6%                |                        | 247                      |                   |                     |                         |               | 0.25            | 0.54     |          |
| tnetb               | 1.56              | 7450       | nan         | [42]      | 7851                  |                         |                   | 5.4%                |                        | 250                      |                   |                     |                         |               | 0.25            | 0.54     |          |
| tnetb               | 1.58              | 7550       | nan         | [42]      | 7919                  |                         |                   | 4.9%                |                        | 256                      |                   |                     |                         |               | 0.25            | 0.55     |          |
| tnetb               | 1.60              | 7700       | nan         | [42]      | 7986                  |                         |                   | 3.7%                |                        | 263                      |                   |                     |                         |               | 0.25            | 0.55     |          |
| tnetb               | 1.61              | 7740       | nan         | [42]      | 8020                  |                         |                   | 3.6%                |                        | 266                      |                   |                     |                         |               | 0.25            | 0.55     |          |
| tnetb               | 1.65              | 7870       | nan         | [42]      | 8155                  |                         |                   | 3.6%                |                        | 280                      |                   |                     |                         |               | 0.25            | 0.56     |          |
| tnetb               | 1.67              | 7960       | nan         | [42]      | 8222                  |                         |                   | 3.3%                |                        | 286                      |                   |                     |                         |               | 0.25            | 0.56     |          |
| tnetb               | 1.68              | 7990       | nan         | [49]      | 8256                  |                         |                   | 3.3%                |                        | 290                      |                   |                     |                         |               | 0.25            | 0.57     |          |
| tnetb               | 1.70              | 8050       | nan         | [42]      | 8323                  |                         |                   | 3.4%                |                        | 297                      |                   |                     |                         |               | 0.25            | 0.57     |          |

DEoS DATABASE

| Number of Explosives | Number of data |            | residuals D  |           |                       |                         | residuals P       |                     |                        |                          | Gamma (γ) correlation (CHNO explosives) |                     | Jones and Grüneisen parameters (DEoS Model) |                 |                   |      |      |
|----------------------|----------------|------------|--------------|-----------|-----------------------|-------------------------|-------------------|---------------------|------------------------|--------------------------|-----------------------------------------|---------------------|---------------------------------------------|-----------------|-------------------|------|------|
|                      | D              | P          | Statistics   |           | velocity              |                         | Statistics        |                     | pressure               |                          | r                                       | 0.44                | 0.53                                        | average values  | α                 | Γ    |      |
|                      |                |            | KJ           | DEoS      | KJ                    | DEoS                    | KJ                | DEoS                | KJ                     | DEoS                     |                                         |                     |                                             |                 |                   |      |      |
| KJ (only CHNO)       | 449            | 224        | RMRS         | 3.4%      | 1.7%                  | RMRS                    | 7.0%              | 6.0%                |                        |                          |                                         |                     |                                             |                 |                   |      |      |
| DEoS                 | 519            | 263        | MAPR         | 2.5%      | 1.3%                  | MAPR                    | 5.6%              | 4.9%                |                        |                          |                                         |                     |                                             | 0.27            | 0.60              |      |      |
|                      |                |            | P97.5        | 8.2%      | 3.9%                  | P97.5                   | 17.0%             | 12.6%               |                        |                          |                                         |                     |                                             | 0.02            | 0.06              |      |      |
| experimental data    |                |            | calculated D |           |                       |                         | calculated P      |                     |                        |                          |                                         |                     |                                             |                 |                   |      |      |
| Acr                  | density (g/cc) | Dexp (m/s) | Pexp (kbar)  | reference | D <sub>KJ</sub> (m/s) | D <sub>DEoS</sub> (m/s) | RRD <sub>KJ</sub> | RRD <sub>DEoS</sub> | P <sub>KJ</sub> (kbar) | P <sub>DEoS</sub> (kbar) | RRP <sub>KJ</sub>                       | RRP <sub>DEoS</sub> | Y <sub>experimental</sub>                   | Y <sub>KJ</sub> | Y <sub>DEoS</sub> | α    | Γ    |
| tnetb                | 1.71           | 8100       | nan          | [49]      | 8357                  | 8031                    | 3.2%              | -0.9%               | 300                    | 290                      |                                         |                     |                                             |                 |                   | 0.26 | 0.57 |
| tnetb                | 1.74           | 8210       | nan          | [42]      | 8458                  | 8127                    | 3.0%              | -1.0%               | 311                    | 301                      |                                         |                     |                                             |                 |                   | 0.26 | 0.58 |
| tnetb                | 1.76           | 8290       | nan          | [42]      | 8525                  | 8192                    | 2.8%              | -1.2%               | 318                    | 309                      |                                         |                     |                                             |                 |                   | 0.26 | 0.58 |
| tnetb                | 1.77           | 8310       | nan          | [42]      | 8559                  | 8224                    | 3.0%              | -1.0%               | 322                    | 313                      |                                         |                     |                                             |                 |                   | 0.26 | 0.58 |
| tnetb                | 1.78           | 8300       | nan          | [48]      | 8593                  | 8257                    | 3.5%              | -0.5%               | 325                    | 317                      |                                         |                     |                                             |                 |                   | 0.26 | 0.58 |
| tnetb                | 1.78           | 8260       | nan          | [42]      | 8593                  | 8257                    | 4.0%              | 0.0%                | 325                    | 317                      |                                         |                     |                                             |                 |                   | 0.26 | 0.58 |
| tnetb                | 1.78           | 8460       | nan          | [10]      | 8593                  | 8257                    | 1.6%              | -2.4%               | 325                    | 317                      |                                         |                     |                                             |                 |                   | 0.26 | 0.58 |
| tnetb                | 1.79           | 8270       | nan          | [34]      | 8626                  | 8289                    | 4.3%              | 0.2%                | 329                    | 321                      |                                         |                     |                                             |                 |                   | 0.26 | 0.59 |
| tnm                  | 1.64           | 6360       | 159          | [8]       | 6332                  | 6540                    | -0.4%             | 2.8%                | 168                    | 172                      | 5.6%                                    | 7.9%                | 3.17                                        | 2.92            | 3.09              | 0.31 | 0.73 |
| tnm                  | 1.64           | 6480       | 165          | [14]      | 6332                  | 6540                    | -2.3%             | 0.9%                | 168                    | 172                      | 1.8%                                    | 4.0%                | 3.17                                        | 2.92            | 3.09              | 0.31 | 0.73 |
| tnm                  | 1.65           | 6450       | 155          | [8]       | 6359                  | 6571                    | -1.4%             | 1.9%                | 170                    | 174                      | 9.7%                                    | 12.3%               | 3.43                                        | 2.92            | 3.09              | 0.31 | 0.73 |
| TNM/BENZ (76.4/23.6) | 1.36           | 6850       | nan          | [14]      | 7019                  | 6794                    | 2.5%              | -0.8%               | 182                    | 173                      |                                         |                     |                                             |                 |                   | 0.23 | 0.49 |
| TNM/NM (0.071/1)     | 1.20           | 6570       | 138          | [14]      | 6799                  | 6602                    | 3.5%              | 0.5%                | 155                    | 143                      | 12.2%                                   | 4.0%                | 2.74                                        | 2.57            | 2.64              | 0.23 | 0.50 |
| TNM/NM (0.25/1)      | 1.31           | 6880       | 156          | [14]      | 7453                  | 7148                    | 8.3%              | 3.9%                | 199                    | 184                      | 27.8%                                   | 17.9%               | 2.97                                        | 2.65            | 2.64              | 0.23 | 0.50 |
| TNM/NM (0.5/1)       | 1.40           | 6780       | 168          | [14]      | 7265                  | 6911                    | 7.2%              | 1.9%                | 198                    | 179                      | 18.1%                                   | 6.7%                | 2.82                                        | 2.72            | 2.72              | 0.24 | 0.53 |
| TNM/NM (60/40)       | 1.15           | 6360       | 132          | [31]      | 6470                  | 6284                    | 1.7%              | -1.2%               | 136                    | 124                      | 2.9%                                    | -5.8%               | 2.52                                        | 2.54            | 2.65              | 0.24 | 0.51 |
| TNM/NM (70/30)       | 1.24           | 6790       | 160          | [6]       | 7033                  | 6767                    | 3.6%              | -0.3%               | 170                    | 156                      | 6.4%                                    | -2.6%               | 2.57                                        | 2.60            | 2.64              | 0.23 | 0.50 |
| TNM/NM (80/20)       | 1.35           | 6790       | 180          | [6]       | 7265                  | 6919                    | 7.0%              | 1.9%                | 194                    | 175                      | 7.5%                                    | -2.8%               | 2.46                                        | 2.68            | 2.69              | 0.24 | 0.52 |
| TNM/NM (90/10)       | 1.48           | 6760       | 187          | [6]       | 6944                  | 6605                    | 2.7%              | -2.3%               | 189                    | 169                      | 0.9%                                    | -9.8%               | 2.62                                        | 2.78            | 2.83              | 0.26 | 0.58 |
| tnt                  | 1.00           | 5111       | 64           | [38]      | 5112                  | 5053                    | 0.0%              | -1.1%               | 75                     | 73                       | 17.9%                                   | 13.8%               | 3.08                                        | 2.46            | 2.51              | 0.22 | 0.45 |
| tnt                  | 1.00           | 5000       | 67           | [8]       | 5112                  | 5053                    | 2.2%              | 1.1%                | 75                     | 73                       | 12.6%                                   | 8.7%                | 2.73                                        | 2.46            | 2.51              | 0.22 | 0.45 |
| tnt                  | 1.33           | 6076       | nan          | [38]      | 6063                  | 6017                    | -0.2%             | -1.0%               | 133                    | 130                      |                                         |                     |                                             |                 |                   | 0.24 | 0.52 |
| tnt                  | 1.36           | 6200       | 124          | [8]       | 6152                  | 6107                    | -0.8%             | -1.5%               | 140                    | 137                      | 12.5%                                   | 10.5%               | 3.22                                        | 2.69            | 2.70              | 0.24 | 0.52 |
| tnt                  | 1.38           | 6212       | nan          | [31]      | 6201                  | 6157                    | -0.2%             | -0.9%               | 143                    | 141                      |                                         |                     |                                             |                 |                   | 0.24 | 0.53 |
| tnt                  | 1.42           | 6363       | nan          | [31]      | 6320                  | 6277                    | -0.7%             | -1.3%               | 152                    | 150                      |                                         |                     |                                             |                 |                   | 0.24 | 0.54 |
| tnt                  | 1.45           | NaN        | 161          | [38]      | 6398                  | 6356                    |                   |                     | 158                    | 156                      | -2.1%                                   | -3.1%               |                                             |                 |                   | 0.25 | 0.54 |
| tnt                  | 1.45           | 6500       | 144          | [8]       | 6412                  | 6371                    | -1.3%             | -2.0%               | 159                    | 157                      | 10.2%                                   | 9.2%                | 3.25                                        | 2.76            | 2.74              | 0.25 | 0.54 |
| tnt                  | 1.54           | 6736       | nan          | [34]      | 6681                  | 6643                    | -0.8%             | -1.4%               | 180                    | 180                      |                                         |                     |                                             |                 |                   | 0.25 | 0.56 |
| tnt                  | 1.57           | 6814       | nan          | [34]      | 6747                  | 6711                    | -1.0%             | -1.5%               | 185                    | 186                      |                                         |                     |                                             |                 |                   | 0.25 | 0.57 |
| tnt                  | 1.58           | 6880       | 184          | [34]      | 6788                  | 6752                    | -1.3%             | -1.9%               | 188                    | 190                      | 2.4%                                    | 3.0%                | 3.06                                        | 2.87            | 2.80              | 0.25 | 0.57 |
| tnt                  | 1.59           | 6872       | nan          | [10]      | 6814                  | 6778                    | -0.8%             | -1.4%               | 191                    | 192                      |                                         |                     |                                             |                 |                   | 0.26 | 0.57 |
| tnt                  | 1.59           | 6940       | 202          | [38]      | 6817                  | 6781                    | -1.8%             | -2.3%               | 191                    | 192                      | -5.6%                                   | -4.8%               | 2.79                                        | 2.87            | 2.80              | 0.26 | 0.57 |
| tnt                  | 1.59           | 6950       | nan          | [34]      | 6817                  | 6781                    | -1.9%             | -2.4%               | 191                    | 192                      |                                         |                     |                                             |                 |                   | 0.26 | 0.57 |
| tnt                  | 1.59           | 6940       | 176.5        | [10]      | 6817                  | 6781                    | -1.8%             | -2.3%               | 191                    | 192                      | 8.1%                                    | 8.9%                | 3.34                                        | 2.87            | 2.80              | 0.26 | 0.57 |
| tnt                  | 1.60           | 6700       | 189          | [53]      | 6831                  | 6796                    | 2.0%              | 1.4%                | 192                    | 194                      | 1.6%                                    | 2.4%                | 2.79                                        | 2.88            | 2.81              | 0.26 | 0.57 |
| tnt                  | 1.61           | 6842       | nan          | [34]      | 6860                  | 6825                    | 0.3%              | -0.2%               | 194                    | 196                      |                                         |                     |                                             |                 |                   | 0.26 | 0.57 |
| tnt                  | 1.62           | 6883       | nan          | [10]      | 6889                  | 6854                    | 0.1%              | -0.4%               | 197                    | 199                      |                                         |                     |                                             |                 |                   | 0.26 | 0.57 |
| tnt                  | 1.63           | NaN        | 210          | [34]      | 6932                  | 6898                    |                   |                     | 200                    | 203                      | -4.5%                                   | -3.3%               |                                             |                 |                   | 0.26 | 0.58 |
| tnt                  | 1.63           | 7070       | 205          | [8]       | 6932                  | 6898                    | -1.9%             | -2.4%               | 200                    | 203                      | -2.2%                                   | -1.0%               | 2.97                                        | 2.91            | 2.82              | 0.26 | 0.58 |
| tnt                  | 1.63           | 6940       | 190          | [34]      | 6938                  | 6904                    | 0.0%              | -0.5%               | 201                    | 204                      | 5.8%                                    | 7.2%                | 3.14                                        | 2.91            | 2.82              | 0.26 | 0.58 |
| tnt                  | 1.63           | 7070       | 205          | [34]      | 6938                  | 6904                    | -1.9%             | -2.3%               | 201                    | 204                      | -2.0%                                   | -0.7%               | 2.98                                        | 2.91            | 2.82              | 0.26 | 0.58 |
| tnt                  | 1.64           | 6940       | nan          | [48]      | 6961                  | 6928                    | 0.3%              | -0.2%               | 203                    | 206                      |                                         |                     |                                             |                 |                   | 0.26 | 0.58 |
| tnt                  | 1.64           | 6930       | 210          | [8]       | 6961                  | 6928                    | 0.5%              | 0.0%                | 203                    | 206                      | -3.4%                                   | -2.0%               | 2.75                                        | 2.92            | 2.82              | 0.26 | 0.58 |
| tnt                  | 1.64           | 6950       | 190          | [31]      | 6961                  | 6928                    | 0.2%              | -0.3%               | 203                    | 206                      | 6.8%                                    | 8.3%                | 3.17                                        | 2.92            | 2.82              | 0.26 | 0.58 |
| tnt                  | 1.64           | 6958       | 192          | [31]      | 6961                  | 6928                    | 0.0%              | -0.4%               | 203                    | 206                      | 5.7%                                    | 7.2%                | 3.14                                        | 2.92            | 2.82              | 0.26 | 0.58 |
| tnt                  | 1.64           | NaN        | 195          | [53]      | 6961                  | 6928                    |                   |                     | 203                    | 206                      | 4.1%                                    | 5.5%                |                                             |                 |                   | 0.26 | 0.58 |
| tnt                  | 1.64           | NaN        | 217          | [14]      | 6961                  | 6928                    |                   |                     | 203                    | 206                      | -6.5%                                   | -5.2%               |                                             |                 |                   | 0.26 | 0.58 |
| TNT/FOX-12(50/50)    | 1.65           | 7120       | 221          | [18]      | 7317                  | 7471                    | 2.8%              | 4.9%                | 225                    | 234                      | 1.9%                                    | 5.8%                | 2.79                                        | 2.93            | 2.94              | 0.28 | 0.64 |
| tnstab               | 1.74           | 8580       | nan          | [8]       | 8247                  | 8647                    | -3.9%             | 0.8%                | 296                    | 338                      |                                         |                     |                                             |                 |                   | 0.26 | 0.59 |
| tnmtnta              | 1.49           | 7300       | nan          | [14]      | 7355                  | 7542                    | 0.8%              | 3.3%                | 213                    | 221                      |                                         |                     |                                             |                 |                   | 0.26 | 0.59 |
| tnmtnta              | 1.57           | 7800       | nan          | [48]      | 7615                  | 7825                    | -2.4%             | 0.3%                | 236                    | 248                      |                                         |                     |                                             |                 |                   | 0.27 | 0.60 |
| TO/NM (14.5/85.5)    | 1.09           | 5840       | 100          | [14]      | 5716                  | 5674                    | -2.1%             | -2.8%               | 101                    | 96                       | 1.3%                                    | -4.3%               | 2.71                                        | 2.51            | 2.66              | 0.24 | 0.51 |
| ttnh                 | 2.01           | 9150       | nan          | [48]      | 8991                  | 9214                    | 0.7%              | -1.7%               | 401                    | 412                      |                                         |                     |                                             |                 |                   | 0.28 | 0.64 |
| X-0341               | 1.90           | 7816       | nan          | [7]       |                       | 7931                    |                   | 1.5%                |                        |                          |                                         |                     |                                             |                 |                   | 0.31 | 0.72 |
| X-0342               | 1.90           | 7866       | nan          | [7]       |                       | 7979                    |                   | 1.4%                |                        |                          |                                         |                     |                                             |                 |                   | 0.30 | 0.71 |
| X-0343               | 1.90           | 7915       | nan          | [7]       |                       | 8029                    |                   | 1.4%                |                        |                          |                                         |                     |                                             |                 |                   | 0.30 | 0.71 |
| X-0344               | 1.89           | 8046       | nan          | [7]       |                       | 8121                    |                   | 0.9%                |                        |                          |                                         |                     |                                             |                 |                   | 0.30 | 0.70 |

[\*] D<sub>KJ</sub> = 6482 m/s and D<sub>TW</sub> = 6266 m/s with H2O(l) instead of H2O(g)  
 [\*\*] 3% of Viton B in the composition as 3% Viton A in the calculation

## references

- [1] A. Belaada and W. A. Trzcinski, 1,1-Diamino-2,2-dinitroethene (DADNE, FOX-7) – Properties and Formulations (a Review), *Cent. Eur. J. Energ. Mater.* 2016, 2(13), 527–544.
- [2] A. Dolgoborodov, M. Brajnikov, M. Makhov, N. Safronov, V. Kirilenko, Detonation parameters of pressed charges of benzotrifuroxane. *Combust. Explos. Shock Waves* 2013, 49, 723–730.
- [3] A. Elbeih, M. M. Mohamed, T. Wafy, Sensitivity and detonation characteristics of selected nitramines bonded by sylgard binder, *Propellants Explos. Pyrotech.* 2016, 41(6), 1044–1049.
- [4] A. K. Hussein, A. Elbeih, S. Zeman, The effect of glycidyl azide polymer on the stability and explosive properties of different interesting nitramines. *RSC Adv.* 2018, 8,17272-17278.
- [5] A. Singh, M. Kumar, P. Soni, M. Singh, A. Srivastava, Mechanical and explosive properties of plastic bonded explosives based on mixture of HMX and TATB. *Def. Sci. J.* 2013, 63(6), 622–629.
- [6] A. V. Utkin, V. M. Mochalova, A. M. Astakhov, V. E. Rykova, S. A. Koldunov, Structure of detonation waves in mixtures of tetranitromethane with nitrobenzene and methanol. *Combust. Explos. Shock Waves* 2020, 56, 556–565.
- [7] A. W. Campbell, H. L. Flaugh, A. Popolato, A. J. B. Ramsay, Customized explosives based on plastic-bonded mixtures to TATB and HMX, Seventh Symposium (International) on Detonation, Annapolis, 19 Jun 1981, Los Alamos National Lab. (LANL), MD, USA 1981.
- [8] B. C. McGee, M. L. Hobbs, M. R. Baer, Exponential 6 Parameterization for the JC23-EOS, Report SAND98-1191, Sandia National Laboratories, Albuquerque, NM, USA 1998.
- [9] B. Le Roux, M. Goffier, M. Rat, S. Lecume, Development of a cast plastic bonded explosive with high CL20 content, Insensitive munitions & energetic materials technology symposium, Bristol, 24-28 april 2006, NDIA, MSIAC and IMEMG, UK 2006.
- [10] B. M. Dobratz, P. C. Crawford, LLNL Explosives: Handbook Properties of Chemical Explosives and Explosive Simulants, Lawrence Livermore National Laboratory, California, CA, USA 1985.
- [11] B. T. Fedoroff, O. E. Sheffield, Encyclopedia of explosives and related items, PATR 2700, Vol. 2, p. B270, Picatinny Arsenal, Dover, NJ, USA 1962.
- [12] B. T. Fedoroff, O. E. Sheffield, Encyclopedia of explosives and related items, PATR 2700, Vol. 5, p. E124, Picatinny Arsenal, Dover, NJ, USA 1962.
- [13] C. M. Tarver, Ignition and growth reactive flow modeling of detonating LX-04 using recent and older experimental data, AIP Conference Proceedings 1979, 100042 (2018)
- [14] C.L. Mader, Numerical Modeling of Explosives and Propellants, Third Edition, CRC Press, 2008.
- [15] D. Price, A. R. Clairmont Jr., (1968), The Response of Nitroguanidine to a Strong Shock, NOLTR 67-169, US Naval Ordnance Laboratory, White Oak, MD, USA 1968.
- [16] D. Price, The detonation velocity-loading density relation for selected explosives and mixtures of explosives, *J. Energ. Mater.* 1983, 1(1), 55-82.
- [17] E.G. Francois, D.E. Chavez, J.T. Mang, V.E. Sanders, J.M. Lloyd, Shock sensitivity of Diaminoazoxyfuran (DAAF) using an instrumented Small Scale Gap Test, LA-UR-08-07858, 40th International Conference of ICT, Los Alamos National Laboratories, Los Alamos, NM, USA, 2009
- [18] E-C Koch, Insensitive high explosives: IV. Nitroguanidine — Initiation & detonation, *Def. Technol.* 2019, 15(4), 467-487.
- [19] G. S. Yakovleva, R. K. Kurbangalina, L. N. Stesik, Rate of detonation of hydrazonium azide. *Combust. Explos. Shock Waves* 1974, 10, 233-235.
- [20] H. Östmark, A. Helte, T.E. Carlsson, N-guanylurea-dinitramide (FOX-12): A new extremely insensitive energetic material for explosives applications, Thirteenth International Detonation Symp., Norfolk, 23-28 Jul 2006, Office of Naval Research, VA, USA 2006.
- [21] I. Zhukov, G. Kozak, Calculation of thermochemical and explosive characteristics of furoxanes. *Central Eur. J. Energ. Mater.* 2008, 5(34), 45-54.
- [22] J. P. Lu, Evaluation of the Thermo Chemical Code CheetaH 2.0 for Modeling Explosives Performance. Report DSTO-TR-1199, Aeronautical and Maritime Research Laboratory, Melbourne, AU 2001.
- [23] J. R. Stine, On predicting properties of explosives – detonation velocity. *J. Energ. Mater.* 1990, 8(1-2), 41-73.
- [24] J. Rečko, R. Lewczuk, L. Szymańczyk, S. Zeman, Study on explosive properties of BCHMX. Proceedings of the 22nd Seminar on New Trends in Research of Energetic Materials : NTREM, Pardubice, 10-12 April 2019, University of Pardubice, CZ 2019.
- [25] L. G. Green, E. L. Lee, Detonation pressure measurements on PETN. Proceedings of the 13th International Detonation Symposium, Norfolk, VA, United States 2006, pp. 1144-1150.
- [26] M. A. Daniel, P. J. Davies, I. J. Lochert, FOX-7 for Insensitive Boosters, Report DSTO-TR-2449, Defence Science and Technology Organisation, Weapons Systems DIV, Edinburgh, AU 2010.
- [27] M. A. Ilyushin, I. V. Tselinsky, I. V. Shugalei, Environmentally friendly energetic materials for initiation devices. *Cent. Eur. J. Energ. Mater.* 2012, 9(4), 293-327.
- [28] M. D. Joseph, S. K. Jangid, R. S. Satpute, B. G. Polke, T. Nath, S. N. Asthana, A. S. Rao, Studies on Advanced RDX/TATB-Based Low Vulnerable Sheet Explosives with HTPB Binder, *Propellants Explos. Pyrotech.* 2009, 34, 326–330.
- [29] M. F. Gogulya, M. N. Makhov, A. Yu. Dolgoborodov, M. A. Brazhnikov, V. I. Arkhipov, V. G. Shchetinin, Mechanical sensitivity and detonation parameters of aluminized explosives. *Combust. Explos. Shock Waves* 2004, 40, 445-457.
- [30] M. F. Gogulya, M. N. Makhov, M. A. Brazhnikov, A. Yu. Dolgoborodov, Detonation velocity of BTNEN/Al. *Combust. Explos. Shock Waves* 2006, 42, 480-485.
- [31] M. J. Kamlet, J. M. Short, The chemistry of detonations. VI. A Rule for Gamma as a criterion for choice among conflicting detonation pressure measurements, *Combust. Flame* 1980, 38, 221-230.
- [32] M. Künzel, R. Matyáš, O. Vodochoďský, J. Pachman, Explosive properties of melt cast erythritol tetranitrate (ETN). *Cent. Eur. J. Energ. Mater.* 2017, 14(2), 418-429.
- [33] N. V. Kozryev, Reparametrization of the BKW equation of state for CHNO explosives which release no condensed carbon upon detonation. *Cent. Eur. J. Energ. Mater.* 2015, 12(4), 651-669.
- [34] P. Cooper, *Explosives Engineering*, Wiley-VCH, NY, USA 1996.
- [35] P. Samuels, K. Spangler, D. Iwaniuk, R. Cornell, E. L. Baker, L. I. Stiel, Detonation performance analyses for recent energetic molecules, AIP Conference Proceedings 1979, 2018, 150033.
- [36] R. E. Cornell, E. T. Wrobel, An experimental investigation of corner-turning performance in a large double cylinder of highly-insensitive explosive. *Propellants Explos. Pyrotech.* 2021, 46, 378-388.
- [37] R. Engelke, S. A. Sheffield, L. L. Davis, Experimental and Predicted Detonation Parameters for Liquid-Phase H2O2/H2O Mixtures, *J. Phys. Chem.* 2000, 104, 6894-6898.
- [38] R. Jeremić, J. Bogdanov, Development of a new model for the calculation of the detonation parameters of high explosives, *J. Serb. Chem. Soc.* 2012, 77-3, 371–380.
- [39] R. K. Kurbangalina, E. A. Patskov, L. N. Stesik, G. Yakovleva, Detonation of liquid hydrazoic acid and its aqueous solutions. *J. Appl. Mech. Tech. Phys.* 1970, 11, 672-677.
- [40] R. Lewczuk, P. Košík, J. Rečko, Performance of BCHMX in small charges. *Propellants Explos. Pyrotech.* 2020, 45, 581-586.
- [41] R. Meyer, J. Köhler, A. Homburg, *Explosives*, Wiley-VCH Verlag GmbH, Weinheim, 2007.
- [42] S. A. Kolesnikov, A. V. Utkin, Nonclassical steady-state detonation regimes in pressed TNETB. *Combust. Explos. Shock Waves* 2007, 43, 710–716.
- [43] S. W. Vincent, S. I. Jackson, C. Chiquete, M. Short, The geometric scaling of IMX-104 explosive: Detonation velocity versus charge size for cylindrical rate sticks and slab tests, in: *Proc. 15th International Detonation Symposium* (Eds.: J. Carney and J. Maienschein), Office of Naval Research, 2015, p. 534.
- [44] S. Zeman, A. Elbeih, Z. Akštejn. Preliminary study on several plastic bonded explosives based on cyclic nitramines. *Chin. J. Energ. Mater.* 2011, 19 (1), 8-12.
- [45] V. Džingalašević, G. Antić, D. Mladenović, Ratio of detonation pressure and critical pressure of high explosives with different compounds. *Sci. Tech. Rev.* 2004, 3-4, 72-76.
- [46] V. I. Pepekin, B. L. Korsunskii, Y. N. Matyushin, Explosive properties of furoxanes. *Combust. Explos. Shock Waves* 2008, 44, 110-114.
- [47] V. I. Pepekin, Limiting detonation velocities and limiting propelling powers of organic explosives. *Dokl. Phys. Chem.* 2007, 414, 159-161.
- [48] V. I. Pepekin, S. A. Gubin, Methods of calculating the detonation parameters of explosives, *Khimicheskaya fizika* 2003, 22(9), 72–97. [in Russian]
- [49] V. M. Mochalova, A. V. Utkin, A. V. Anan'in, Effect of the degree of dispersion on the detonation wave structure in pressed TNETB. *Combust. Explos. Shock Waves* 2007, 43, 575–579.
- [50] V. Pepekin, Development of High Efficiency Energetic Explosives, 22nd International Pyrotechnics Seminar, Fort Collins, 15-19 July 1996, The International Pyrotechnics Society, Colorado, USA 1996.
- [51] V. W. Manner, D. N. Preston, B. C. Tappan, V. E. Sanders, G. W. Brown, E. Hartline, B. Jensen, Explosive performance properties of erythritol tetranitrate (ETN). *Propellants Explos. Pyrotech.* 2015, 40(4), 460-462.
- [52] V. S. Mishra, S. R. Vadali, A. L. Bhagat, R. K. Garg, V. M. Kugaonkar, S. Raman, R. K. Sinha, S. Asthana, Studies on NTO-, FOX-7- and DNAN-based melt cast formulations. *Cent. Eur. J. Energ. Mater.* 2017, 14, 403–417.
- [53] W. A. Trzcinski, S. Cudzilo, S. Dipak, M. Nita, A comparison of the sensitivity and performance characteristics of melt-pour explosives with TNT and DNAN binder. *Cent. Eur. J. Energ., Mat.* 2014, 11: 445-455
- [54] W. A. Trzcinski, S. Cudzilo, Z. Chylek, L. Szymańczyk, Detonation properties of 1,1-diamino-2,2-dinitroethene (DADNE). *J. Hazard. Mater.* 2008, 157 (2-3): 605-612.
- [55] W. Xiong, A simple method for calculating detonation parameters of explosives, *J. Energ. Mater.* 1985, 3(4), 263-277.
- [56] Y. A. Bogdanova, S. A. Gubin, B. L. Korsunskii, V. I. Pepekin, Detonation characteristics of powerful insensitive explosives. *Combust. Explos. Shock Waves* 2009, 45, 738-743.
- [57] Y. A. Bogdanova, S. A. Gubin, A. A. Anikeev, S. B. Victorov, Thermodynamic modelling of detonation H-N-O high explosives, *J. Phys.: Conf. Ser.* 2015, 751, 012018.

[c] calculated value
